# Supplementary material for: Properties and reactivities of nonheme iron(iv)–oxo versus iron(v)–oxo: long-range electron transfer versus hydrogen atom abstraction
Source: Royal Society of Chemistry journal article supplement (doi:10.1039/c4cp03053b), 2014-01-01
Supplement: c4cp03053b1.pdf [file c4cp03053b1.pdf]

# Electronic Supporting Information

## **Properties and reactivities of nonheme iron(IV)-oxo versus iron(V)-oxo: Long-range electron transfer versus hydrogen atom abstraction**

Baharan Karamzadeh,<sup>a</sup> Devendra Singh,<sup>b</sup> Wonwoo Nam,<sup>\*c</sup> Devesh Kumar<sup>\*b</sup> and Sam P. de Visser<sup>\*a</sup>

<sup>a</sup> Manchester Institute of Biotechnology and School of Chemical Engineering and Analytical Science, the University of Manchester, 131 Princess Street, Manchester M1 7DN, United Kingdom. E-mail: [sam.devisser@manchester.ac.uk](mailto:sam.devisser@manchester.ac.uk)

<sup>b</sup> Department of Applied Physics, School for Physical Sciences, Babasaheb Bhimrao Ambedkar University, Vidya Vihar, Rai Bareilly Road, Lucknow 226 025, India. E-mail: [dkclcre@yahoo.com](mailto:dkclcre@yahoo.com)

<sup>c</sup> Department of Chemistry and Nano Science, Ewha Womans University, Seoul 120-750, Korea. E-mail: [wwnam@ewha.ac.kr](mailto:wwnam@ewha.ac.kr)

Full reference for Gaussian-09:

Gaussian 09, Revision B.01,

M. J. Frisch, G. W. Trucks, H. B. Schlegel, G. E. Scuseria, M. A. Robb, J. R. Cheeseman, G. Scalmani, V. Barone, B. Mennucci, G. A. Petersson, H. Nakatsuji, M. Caricato, X. Li, H. P. Hratchian, A. F. Izmaylov, J. Bloino, G. Zheng, J. L. Sonnenberg, M. Hada, M. Ehara, K. Toyota, R. Fukuda, J. Hasegawa, M. Ishida, T. Nakajima, Y. Honda, O. Kitao, H. Nakai, T. Vreven, J. A. Montgomery Jr., J. E. Peralta, F. Ogliaro, M. Bearpark, J. J. Heyd, E. Brothers, K. N. Kudin, V. N. Staroverov, T. Keith, R. Kobayashi, J. Normand, K. Raghavachari, A. Rendell, J. C. Burant, S. S. Iyengar, J. Tomasi, M. Cossi, N. Rega, J. M. Millam, M. Klene, J. E. Knox, J. B. Cross, V. Bakken, C. Adamo, J. Jaramillo, R. Gomperts, R. E. Stratmann, O. Yazyev, A. J. Austin, R. Cammi, C. Pomelli, J. W. Ochterski, R. L. Martin, K. Morokuma, V. G. Zakrzewski, G. A. Voth, P. Salvador, J. J. Dannenberg, S. Dapprich, A. D. Daniels, O. Farkas, J. B. Foresman, J. V. Ortiz, J. Cioslowski and D. J. Fox, Gaussian, Inc., Wallingford CT, 2010.

**Table S1: Group spin densities and charges of UB3LYP/B1 optimized geometries in the gas-phase.**

|                                      | Spin |      |       |      | Charge |       |      |      |
|--------------------------------------|------|------|-------|------|--------|-------|------|------|
|                                      | Fe   | O    | BQEN  | EB   | Fe     | O     | BQEN | EB   |
| <sup>3</sup> <b>1</b>                | 1.05 | 1.03 | -0.08 | -    | 0.61   | -0.27 | 1.65 | -    |
| <sup>5</sup> <b>1</b>                | 2.95 | 0.84 | 0.21  | -    | 0.75   | -0.28 | 1.53 | -    |
| <sup>3</sup> <b>RC</b> <sub>1</sub>  | 1.04 | 1.02 | -0.07 | 0.00 | 0.62   | -0.28 | 1.61 | 0.06 |
|                                      | Fe   | OH   | BQEN  | EB-H | Fe     | OH    | BQEN | EB-H |
| <sup>3</sup> <b>TS</b> <sub>HA</sub> | 0.85 | 0.78 | -0.07 | 0.43 | 0.64   | -0.17 | 1.47 | 0.06 |

|                                      | Spin |      |       |       | Charge |       |      |      |
|--------------------------------------|------|------|-------|-------|--------|-------|------|------|
|                                      | Fe   | O    | BQEN  | EB    | Fe     | O     | BQEN | EB   |
| <sup>2</sup> <b>2</b>                | 0.99 | 1.07 | -1.06 | -     | 0.63   | -0.24 | 2.60 | -    |
| <sup>4</sup> <b>2</b>                | 1.02 | 1.08 | 0.90  | -     | 0.64   | -0.23 | 2.60 | -    |
| <sup>2</sup> <b>RC</b> <sub>2</sub>  | 1.10 | 0.98 | -0.08 | -1.00 | 0.62   | -0.32 | 1.70 | 1.00 |
| <sup>4</sup> <b>RC</b> <sub>2</sub>  | 2.98 | 0.82 | 0.20  | -1.00 | 0.75   | -0.33 | 1.58 | 1.00 |
|                                      | Fe   | OH   | BQEN  | EB-H  | Fe     | OH    | BQEN | EB-H |
| <sup>2</sup> <b>TS</b> <sub>HA</sub> | 1.21 | 0.60 | -0.11 | -0.70 | 0.70   | -0.12 | 1.80 | 0.62 |
| <sup>4</sup> <b>TS</b> <sub>HA</sub> | 1.80 | 0.66 | -0.13 | 0.67  | 0.75   | -0.17 | 1.83 | 0.59 |
| <sup>2</sup> <b>I</b>                | 0.98 | 0.11 | -0.09 | 0.00  | 0.65   | -0.28 | 1.65 | 0.98 |
| <sup>4</sup> <b>I</b>                | 2.85 | 0.06 | 0.09  | 0.00  | 0.77   | -0.29 | 1.53 | 0.99 |
| <sup>2</sup> <b>P</b>                | 1.13 | 0.03 | -0.14 | -0.01 | 0.76   | -0.22 | 1.85 | 0.60 |
| <sup>4</sup> <b>P</b>                | 3.05 | 0.02 | 0.02  | -0.09 | 0.82   | -0.22 | 1.74 | 0.66 |

**Table S2: Group spin densities and charges of UB3LYP/B2//UB3LYP/B1 calculations in the gas-phase.**

|                                      | Spin |      |       |      | Charge |       |      |       |
|--------------------------------------|------|------|-------|------|--------|-------|------|-------|
|                                      | Fe   | O    | BQEN  | EB   | Fe     | O     | BQEN | EB    |
| <sup>3</sup> <b>1</b>                | 1.11 | 0.97 | -0.08 | -    | 0.55   | -0.25 | 1.79 | -     |
| <sup>5</sup> <b>1</b>                | 3.09 | 0.76 | 0.15  | -    | 0.61   | -0.24 | 1.63 | -     |
| <sup>3</sup> <b>RC</b> <sub>1</sub>  | 1.10 | 0.96 | -0.07 | 0.01 | 0.40   | -0.21 | 1.85 | -0.04 |
|                                      | Fe   | OH   | BQEN  | EB-H | Fe     | OH    | BQEN | EB-H  |
| <sup>3</sup> <b>TS</b> <sub>HA</sub> | 0.89 | 0.75 | -0.07 | 0.43 | 0.47   | -0.02 | 1.68 | -0.14 |

|                                      | Spin |      |       |       | Charge |       |      |      |
|--------------------------------------|------|------|-------|-------|--------|-------|------|------|
|                                      | Fe   | O    | BQEN  | EB    | Fe     | O     | BQEN | EB   |
| <sup>2</sup> <b>2</b>                | 1.05 | 1.01 | -1.06 | -     | 0.44   | -0.19 | 2.76 | -    |
| <sup>4</sup> <b>2</b>                | 1.08 | 1.02 | 0.90  | -     | 0.43   | -0.19 | 2.76 | -    |
| <sup>2</sup> <b>RC</b> <sub>2</sub>  | 1.16 | 0.93 | -0.09 | -1.00 | 0.32   | -0.26 | 1.93 | 1.01 |
| <sup>4</sup> <b>RC</b> <sub>2</sub>  | 3.12 | 0.74 | 0.14  | -1.00 | 0.47   | -0.27 | 1.79 | 1.01 |
|                                      | Fe   | OH   | BQEN  | EB-H  | Fe     | OH    | BQEN | EB-H |
| <sup>2</sup> <b>TS</b> <sub>HA</sub> | 1.26 | 0.57 | -0.12 | -0.71 | 0.50   | 0.00  | 2.03 | 0.48 |
| <sup>4</sup> <b>TS</b> <sub>HA</sub> | 1.82 | 0.65 | -0.16 | 0.68  | 0.59   | -0.10 | 2.06 | 0.45 |
| <sup>2</sup> <b>I</b>                | 1.00 | 0.10 | -0.10 | 0.00  | 0.48   | -0.29 | 1.82 | 0.99 |
| <sup>4</sup> <b>I</b>                | 2.93 | 0.04 | 0.03  | 0.00  | 0.61   | -0.24 | 1.64 | 0.99 |
| <sup>2</sup> <b>P</b>                | 1.14 | 0.02 | -0.15 | -0.01 | 0.60   | -0.13 | 2.02 | 0.50 |
| <sup>4</sup> <b>P</b>                | 3.12 | 0.00 | -0.04 | -0.08 | 0.67   | -0.01 | 1.84 | 0.50 |

**Table S3: Group spin densities and charges of UB3LYP/B1 single point calculations in solvent on gas-phase optimized geometries.**

|                                      | Spin |      |       |       | Charge |       |      |      |
|--------------------------------------|------|------|-------|-------|--------|-------|------|------|
|                                      | Fe   | O    | BQEN  | EB    | Fe     | O     | BQEN | EB   |
| <sup>2</sup> <b>RC</b> <sub>2</sub>  | 1.09 | 0.99 | -0.08 | -1.00 | 0.63   | -0.32 | 1.68 | 1.00 |
|                                      | Fe   | OH   | BQEN  | EB-H  | Fe     | OH    | BQEN | EB-H |
| <sup>2</sup> <b>TS</b> <sub>HA</sub> | 1.18 | 0.62 | -0.10 | -0.70 | 0.71   | -0.12 | 1.78 | 0.62 |

**Table S4: Group spin densities and charges of UB3LYP/B2 optimized geometries in solvent.**

|                                      | Spin |      |       |       | Charge |       |      |       |
|--------------------------------------|------|------|-------|-------|--------|-------|------|-------|
|                                      | Fe   | O    | BQEN  | EB    | Fe     | O     | BQEN | EB    |
| <sup>3</sup> <b>RC</b> <sub>1</sub>  | 1.11 | 0.96 | -0.07 | 0.01  | 0.39   | -0.21 | 1.85 | -0.04 |
| <sup>5</sup> <b>RC</b> <sub>1</sub>  | 3.15 | 0.68 | 0.13  | 0.00  | 0.61   | -0.33 | 1.28 | 0.21  |
|                                      | Fe   | OH   | BQEN  | EB-H  | Fe     | OH    | BQEN | EB-H  |
| <sup>3</sup> <b>TS</b> <sub>HA</sub> | 0.89 | 0.75 | -0.07 | 0.43  | 0.47   | -0.02 | 1.68 | -0.14 |
| <sup>5</sup> <b>TS</b> <sub>HA</sub> | 4.08 | 0.31 | 0.28  | -0.69 | 0.69   | -0.55 | 1.18 | 0.44  |

|                                      | Spin |      |       |       | Charge |       |      |      |
|--------------------------------------|------|------|-------|-------|--------|-------|------|------|
|                                      | Fe   | O    | BQEN  | EB    | Fe     | O     | BQEN | EB   |
| <sup>2</sup> <b>RC</b> <sub>2</sub>  | 1.17 | 0.92 | -0.09 | -1.00 | 0.32   | -0.26 | 1.93 | 1.01 |
| <sup>4</sup> <b>RC</b> <sub>2</sub>  | 3.16 | 0.69 | 0.12  | -1.00 | 0.61   | -0.32 | 1.27 | 1.20 |
|                                      | Fe   | OH   | BQEN  | EB-H  | Fe     | OH    | BQEN | EB-H |
| <sup>2</sup> <b>TS</b> <sub>HA</sub> | 1.29 | 0.55 | -0.13 | -0.71 | 0.50   | 0.00  | 2.03 | 0.47 |
| <sup>4</sup> <b>TS</b> <sub>HA</sub> | 1.84 | 0.64 | -0.16 | 0.68  | 0.59   | -0.11 | 2.06 | 0.45 |

**Table S5: Group spin densities and charges of UB3LYP\*/B2// UB3LYP/B2 calculations in solvent.**

|                               | Spin |      |       |       | Charge |      |       |       |
|-------------------------------|------|------|-------|-------|--------|------|-------|-------|
|                               | Fe   | O    | BQEN  | EB    | Fe     | O    | BQEN  | EB    |
| <sup>3</sup> RC <sub>1</sub>  | 1.26 | 0.90 | -0.16 | 0.00  | 1.83   | 0.38 | -0.20 | -0.01 |
| <sup>5</sup> RC <sub>1</sub>  | 2.95 | 0.72 | 0.11  | 0.00  | 3.16   | 0.41 | -0.75 | 0.01  |
|                               | Fe   | OH   | BQEN  | EB-H  | Fe     | OH   | BQEN  | EB-H  |
| <sup>3</sup> TS <sub>HA</sub> | 1.14 | 0.84 | -0.13 | 0.16  | -2.66  | 1.21 | 3.80  | -0.35 |
| <sup>5</sup> TS <sub>HA</sub> | 3.80 | 0.27 | 0.47  | -0.63 | -1.72  | 1.36 | 2.67  | -0.30 |

|                               | Spin |      |       |       | Charge |      |      |      |
|-------------------------------|------|------|-------|-------|--------|------|------|------|
|                               | Fe   | O    | BQEN  | EB    | Fe     | O    | BQEN | EB   |
| <sup>2</sup> RC <sub>2</sub>  | 1.25 | 0.91 | -0.16 | -1.00 | -2.35  | 0.36 | 3.98 | 1.01 |
| <sup>4</sup> RC <sub>2</sub>  | 3.18 | 0.75 | 0.08  | -1.00 | -1.97  | 0.63 | 0.02 | 1.02 |
|                               | Fe   | OH   | BQEN  | EB-H  | Fe     | OH   | BQEN | EB-H |
| <sup>2</sup> TS <sub>HA</sub> | 1.36 | 0.52 | -0.19 | -0.69 | -2.44  | 1.40 | 3.73 | 0.31 |
| <sup>4</sup> TS <sub>HA</sub> | 1.57 | 0.82 | -0.18 | 0.78  | -2.91  | 2.11 | 3.55 | 0.26 |

**Table S6: Group spin densities and charges of UB3LYP-D3/B2//UB3LYP/B2 calculations in solvent.**

|                               | Spin |      |       |       | Charge |      |       |       |
|-------------------------------|------|------|-------|-------|--------|------|-------|-------|
|                               | Fe   | O    | BQEN  | EB    | Fe     | O    | BQEN  | EB    |
| <sup>3</sup> RC <sub>1</sub>  | 1.22 | 0.93 | -0.14 | 0.00  | 1.87   | 0.38 | -0.24 | -0.01 |
| <sup>5</sup> RC <sub>1</sub>  | 2.96 | 0.71 | 0.11  | 0.00  | 3.18   | 0.41 | -0.75 | 0.01  |
|                               | Fe   | OH   | BQEN  | EB-H  | Fe     | OH   | BQEN  | EB-H  |
| <sup>3</sup> TS <sub>HA</sub> | 1.08 | 0.86 | -0.11 | 0.17  | -2.61  | 1.21 | 3.73  | -0.34 |
| <sup>5</sup> TS <sub>HA</sub> | 3.84 | 0.25 | 0.47  | -0.64 | -1.67  | 1.35 | 2.61  | -0.29 |

|                               | Spin |      |       |       | Charge |      |      |      |
|-------------------------------|------|------|-------|-------|--------|------|------|------|
|                               | Fe   | O    | BQEN  | EB    | Fe     | O    | BQEN | EB   |
| <sup>2</sup> RC <sub>2</sub>  | 1.20 | 0.93 | -0.14 | -1.00 | -2.30  | 0.37 | 3.92 | 1.01 |
| <sup>4</sup> RC <sub>2</sub>  | 3.19 | 0.75 | 0.08  | -1.00 | -1.93  | 0.63 | 3.25 | 1.02 |
|                               | Fe   | OH   | BQEN  | EB-H  | Fe     | OH   | BQEN | EB-H |
| <sup>2</sup> TS <sub>HA</sub> | 1.34 | 0.55 | -0.18 | -0.71 | -2.37  | 1.40 | 3.65 | 0.32 |
| <sup>4</sup> TS <sub>HA</sub> | 1.57 | 0.81 | -0.17 | 0.79  | -2.87  | 2.11 | 3.51 | 0.26 |

**Table S7: Group spin densities and charges of OPBE/B2//UB3LYP/B2 calculations in solvent.**

|                               | Spin |      |       |       | Charge |      |       |       |
|-------------------------------|------|------|-------|-------|--------|------|-------|-------|
|                               | Fe   | O    | BQEN  | EB    | Fe     | O    | BQEN  | EB    |
| <sup>3</sup> RC <sub>1</sub>  | 1.36 | 0.91 | -0.27 | 0.00  | 0.92   | 0.64 | 0.45  | 0.00  |
| <sup>5</sup> RC <sub>1</sub>  | 2.91 | 0.73 | 0.22  | 0.00  | 2.26   | 0.61 | -0.17 | 0.01  |
|                               | Fe   | OH   | BQEN  | EB-H  | Fe     | OH   | BQEN  | EB-H  |
| <sup>3</sup> TS <sub>HA</sub> | 1.27 | 0.84 | -0.23 | 0.13  | -4.08  | 1.72 | 4.90  | -0.54 |
| <sup>5</sup> TS <sub>HA</sub> | 3.64 | 0.34 | 0.46  | -0.53 | -2.80  | 1.79 | 3.50  | -0.50 |

|                               | Spin |      |       |       | Charge |      |      |      |
|-------------------------------|------|------|-------|-------|--------|------|------|------|
|                               | Fe   | O    | BQEN  | EB    | Fe     | O    | BQEN | EB   |
| <sup>2</sup> RC <sub>2</sub>  | 1.27 | 0.83 | -0.28 | -0.82 | -3.53  | 0.70 | 5.00 | 0.83 |
| <sup>4</sup> RC <sub>2</sub>  | 3.19 | 0.79 | -0.26 | -0.81 | -2.97  | 0.96 | 4.07 | 0.82 |
|                               | Fe   | OH   | BQEN  | EB-H  | Fe     | OH   | BQEN | EB-H |
| <sup>2</sup> TS <sub>HA</sub> | 1.36 | 0.48 | -0.28 | -0.55 | -3.36  | 1.87 | 4.47 | 0.03 |
| <sup>4</sup> TS <sub>HA</sub> | 1.64 | 0.86 | -0.25 | 0.75  | -4.23  | 2.60 | 4.59 | 0.04 |

**Table S8: Group spin densities and charges of MO6/B2//UB3LYP/B2 calculations in solvent.**

|                               | Spin |      |       |       | Charge |      |       |       |
|-------------------------------|------|------|-------|-------|--------|------|-------|-------|
|                               | Fe   | O    | BQEN  | EB    | Fe     | O    | BQEN  | EB    |
| <sup>3</sup> RC <sub>1</sub>  | 1.32 | 0.81 | -0.12 | 0.00  | 1.63   | 0.35 | 0.03  | -0.01 |
| <sup>5</sup> RC <sub>1</sub>  | 3.03 | 0.62 | 0.22  | 0.00  | 2.74   | 0.41 | -0.42 | 0.01  |
|                               | Fe   | OH   | BQEN  | EB-H  | Fe     | OH   | BQEN  | EB-H  |
| <sup>3</sup> TS <sub>HA</sub> | 1.35 | 0.72 | -0.17 | 0.10  | -2.58  | 1.07 | 3.79  | -0.28 |
| <sup>5</sup> TS <sub>HA</sub> | 3.67 | 0.33 | 0.59  | -0.69 | -1.69  | 1.22 | 2.56  | -0.09 |

|                               | Spin |      |       |       | Charge |      |      |      |
|-------------------------------|------|------|-------|-------|--------|------|------|------|
|                               | Fe   | O    | BQEN  | EB    | Fe     | O    | BQEN | EB   |
| <sup>2</sup> RC <sub>2</sub>  | 1.40 | 0.80 | -0.21 | -1.00 | -2.32  | 0.32 | 3.99 | 1.01 |
| <sup>4</sup> RC <sub>2</sub>  | 3.40 | 0.64 | -0.14 | -1.00 | -1.94  | 0.58 | 3.40 | 1.03 |
|                               | Fe   | OH   | BQEN  | EB-H  | Fe     | OH   | BQEN | EB-H |
| <sup>2</sup> TS <sub>HA</sub> | 1.58 | 0.44 | -0.26 | -0.76 | -2.44  | 1.29 | 3.71 | 0.44 |
| <sup>4</sup> TS <sub>HA</sub> | 1.91 | 0.62 | -0.25 | 0.72  | -2.81  | 1.87 | 3.56 | 0.37 |

**Table S9: Absolute energies (in au) of solvent optimized geometries at UB3LYP/B2 level of theory in Jaguar. Also given are absolute energies obtained at UB3LYP-D3/B2// UB3LYP/B2 and UB3LYP/B2 single points with counter-ions and/or solvent models included.**

|                                | E <sub>B2</sub> (au) | E <sub>solv</sub> (kcal/mol) | E <sub>B1</sub> (au) | ZPE (au) | G (au)      | E(B3LYP-D3)  | E(counterions) |
|--------------------------------|----------------------|------------------------------|----------------------|----------|-------------|--------------|----------------|
| <sup>2</sup> RC                | -1712.74651          | -216.5617                    | -1711.65619          | 0.62045  | -1711.09320 | -1712.863521 | -1711.904542   |
| <sup>2</sup> TS <sub>HA</sub>  | -1712.73652          | -226.2400                    | -1711.63556          | 0.61687  | -1711.07854 | -1712.865673 | -1711.895622   |
| <sup>2</sup> I                 | -1712.81313          | -219.1558                    | -1711.71574          | 0.62094  | -1711.15372 |              |                |
| <sup>2</sup> P                 | -1712.82206          | -233.8217                    | -1711.70324          | 0.62513  | -1711.13774 |              |                |
| <sup>4</sup> TS <sub>HA</sub>  | -1712.72814          | -225.4092                    | -1711.63093          | 0.61585  | -1711.07653 | -1712.855127 | -1711.869671   |
| <sup>4</sup> I                 | -1712.80531          | -216.8435                    | -1711.71212          | 0.61853  | -1711.15367 |              |                |
| <sup>4</sup> P                 | -1712.80766          | -230.6535                    | -1711.69278          | 0.62205  | -1711.13279 |              |                |
| <sup>3</sup> RC                | -1713.01226          | -112.4750                    | -1712.08207          | 0.62259  | -1711.51579 | -1713.139412 | -1712.239256   |
| <sup>3</sup> TS <sub>HA</sub>  | -1712.99183          | -112.1291                    | -1712.06820          | 0.62009  | -1711.50518 | -1713.129724 | -1712.223723   |
| <sup>3</sup> TS <sub>reb</sub> | -1713.01969          | -104.1334                    | -1712.10465          | 0.61805  | -1711.54721 |              |                |
| <sup>5</sup> RC                | -1713.00582          | -120.2618                    | -1712.06849          | 0.62011  | -1711.50593 | -1713.125068 | -1712.222864   |
| <sup>5</sup> TS <sub>HA</sub>  | -1712.99448          | -103.7208                    | -1712.83526          | 0.61547  | -1712.30187 | -1713.123225 | -1712.229450   |



**Table S10: Relative energies (in kcal/mol) of solvent optimized geometries in Jaguar followed by single points with dispersion and/or counter-ions included.**

| gas/solvent                    | $\Delta E$ | $\Delta E$ | $\Delta E+ZPE$ | $\Delta E+ZPE$ | $\Delta G$ | $\Delta G$ | $\Delta G+E_{disp}$ | $\Delta E+ZPE+E_{disp}$ | $\Delta E+ZPE$ |
|--------------------------------|------------|------------|----------------|----------------|------------|------------|---------------------|-------------------------|----------------|
|                                | gas        | solv       | gas            | solv           | gas        | solv       | solv                | solv                    | counterions    |
| <sup>2</sup> RC                | 0.00       | 0.00       | 0.00           | 0.00           | 0.00       | 0.00       | 0.00                | 0.00                    | 0.00           |
| <sup>2</sup> TS <sub>HA</sub>  | 15.95      | 6.27       | 13.70          | 4.02           | 9.20       | 2.52       | -5.10               | -3.60                   | 3.35           |
| <sup>2</sup> I                 | -39.21     | -41.80     | -38.90         | -41.50         | -37.98     | -42.41     |                     |                         |                |
| <sup>2</sup> P                 | 0.00       | -47.41     | -27.21         | -44.47         | -27.95     | -45.84     |                     |                         |                |
| <sup>4</sup> TS <sub>HA</sub>  | 20.38      | 11.53      | 17.49          | 8.64           | 10.46      | 6.14       | -0.12               | 2.38                    | 18.99          |
| <sup>4</sup> I                 | -36.62     | -36.90     | -37.82         | -38.11         | -37.94     | -39.75     |                     |                         |                |
| <sup>4</sup> P                 | -24.28     | -38.37     | -23.27         | -37.36         | -24.84     | -40.25     |                     |                         |                |
| <sup>3</sup> RC                | 0.00       | 0.00       | 0.00           | 0.00           | 0.00       | 0.00       | 0.00                | 0.00                    | 0.00           |
| <sup>3</sup> TS <sub>HA</sub>  | 12.48      | 12.82      | 10.91          | 11.25          | 6.65       | 10.77      | 4.03                | 4.51                    | 8.18           |
| <sup>3</sup> TS <sub>reb</sub> | -13.00     | -4.66      | -15.85         | -7.51          | -19.72     | -10.21     |                     |                         |                |
| <sup>3</sup> RC                | 11.83      | 4.04       | 10.27          | 2.49           | 6.19       | 1.71       | 6.67                | 7.44                    | 8.73           |
| <sup>5</sup> TS <sub>HA</sub>  | 14.69      | 11.16      | 10.22          | 6.69           | 3.66       | -9.48      | -10.48              | 5.69                    | 1.68           |

**Table S11: Absolute (in au) and relative (in kcal/mol) energies of UB3LYP-D3/BS2 optimized geometries in solvent using Jaguar.**

|                               | E (au)       | ZPE (au) | G (au)       | $\Delta E$ | $\Delta E+ZPE$ | $\Delta G$ |
|-------------------------------|--------------|----------|--------------|------------|----------------|------------|
| <sup>2</sup> RC <sub>2</sub>  | -1711.857781 | 0.616669 | -1711.315668 | 0.00       | 0.00           | 0.00       |
| <sup>2</sup> TS <sub>HA</sub> | -1711.790995 | 0.616889 | -1711.243077 | 41.91      | 42.05          | 45.55      |
| <sup>4</sup> RC <sub>2</sub>  | -1711.842463 | 0.614722 | -1711.307660 | 9.61       | 8.39           | 5.03       |
| <sup>4</sup> TS <sub>HA</sub> | -1711.769837 | 0.610991 | -1711.227567 | 55.19      | 51.62          | 55.28      |
| <sup>3</sup> RC <sub>1</sub>  | -1712.232231 | 0.619824 | -1711.679293 | 0.00       | 0.00           | 0.00       |
| <sup>3</sup> TS <sub>HA</sub> | -1712.225490 | 0.618635 | -1711.672314 | 4.23       | 3.48           | 4.38       |
| <sup>5</sup> RC <sub>1</sub>  | -1712.216906 | 0.617624 | -1711.667722 | 9.62       | 8.24           | 7.26       |
| <sup>5</sup> TS <sub>HA</sub> | -1712.212018 | 0.608498 | -1711.668939 | 12.68      | 5.58           | 6.50       |

**Table S12: Absolute energies for the individual components of the thermodynamic cycles displayed in Fig 6. Data obtained after a UB3LYP/B1 geometry optimization in Jaguar followed by single points with solvent at UB3LYP/B2 and UB3LYP-D3.**

|                                                             | E            | ZPE          | G            | E            | Esolv        |
|-------------------------------------------------------------|--------------|--------------|--------------|--------------|--------------|
|                                                             | [in au, BS1] | [in au, BS1] | [in au, BS1] | [in au, BS2] | [in au, BS2] |
| H                                                           | -0.500273    | 0.000000     | -0.512911    | -0.502257    | -0.502313    |
| $^3[\text{Fe}(\text{O})(\text{BQEN})(\text{NCCH}_3)]^{2+}$  | -1401.266720 | 0.461886     | -1400.861516 | -1401.882792 | -1401.438646 |
| $^2[\text{Fe}(\text{O})(\text{BQEN})(\text{NCCH}_3)]^+$     | -1401.550421 | 0.459390     | -1401.147290 | -1402.169877 | -1401.610266 |
| $^4[\text{Fe}(\text{O})(\text{BQEN})(\text{NCCH}_3)]^+$     | -1401.575277 | 0.458005     | -1401.177038 | -1402.200044 | -1401.632442 |
| $^2[\text{Fe}(\text{O})(\text{BQEN})(\text{NCCH}_3)]^{3+}$  | -1400.762866 | 0.459175     | -1400.358975 | -1401.375046 | -1401.133819 |
| $^4[\text{Fe}(\text{O})(\text{BQEN})(\text{NCCH}_3)]^{3+}$  | -1400.763880 | 0.459204     | -1400.360585 | -1401.375849 | -1401.135186 |
| $^2[\text{Fe}(\text{OH})(\text{BQEN})(\text{NCCH}_3)]^{2+}$ | -1401.913891 | 0.472648     | -1401.496957 | -1402.534099 | -1402.086966 |
| $^4[\text{Fe}(\text{OH})(\text{BQEN})(\text{NCCH}_3)]^{2+}$ | -1401.906223 | 0.468655     | -1401.496106 | -1402.528603 | -1402.078055 |
| $^3[\text{Fe}(\text{OH})(\text{BQEN})(\text{NCCH}_3)]^{3+}$ | -1401.417264 | 0.470718     | -1401.003078 | -1402.034687 | -1401.796828 |

**Table S13: Relative energies (in kcal/mol) for the electron and hydrogen atom transfer reactions of the thermodynamic cycles in Fig 6.**

|                                                                                                                                                                           | $\Delta E$ | $\Delta E + \text{ZPE}$ | $\Delta E_{\text{solv}} + \text{ZPE}$ | $\Delta G$ | $\Delta G_{\text{solv}}$ |
|---------------------------------------------------------------------------------------------------------------------------------------------------------------------------|------------|-------------------------|---------------------------------------|------------|--------------------------|
|                                                                                                                                                                           | B2         | B2                      | B2                                    | B2         | B2                       |
| $^3[\text{Fe}(\text{O})(\text{BQEN})(\text{NCCH}_3)]^{2+} + e^- \rightarrow$<br>$^2[\text{Fe}(\text{O})(\text{BQEN})(\text{NCCH}_3)]^+ + \text{EA}$                       | -180.15    | -181.71                 | -111.38                               | -181.45    | -108.99                  |
| $^3[\text{Fe}(\text{O})(\text{BQEN})(\text{NCCH}_3)]^{2+} + e^- \rightarrow$<br>$^4[\text{Fe}(\text{O})(\text{BQEN})(\text{NCCH}_3)]^+ + \text{EA}$                       | -199.08    | -201.51                 | -129.50                               | -203.45    | -125.98                  |
| $^3[\text{Fe}(\text{O})(\text{BQEN})(\text{NCCH}_3)]^{2+} + \text{H} \rightarrow$<br>$^2[\text{Fe}(\text{OH})(\text{BQEN})(\text{NCCH}_3)]^{2+} + \text{BDE}_{\text{OH}}$ |            | 93.53                   | 91.62                                 | 78.24      | 76.33                    |
| $^2[\text{Fe}(\text{O})(\text{BQEN})(\text{NCCH}_3)]^{3+} + e^- \rightarrow$<br>$^3[\text{Fe}(\text{O})(\text{BQEN})(\text{NCCH}_3)]^{2+} + \text{EA}$                    | -318.62    | -316.92                 | -192.02                               | -317.79    | -190.46                  |
| $^4[\text{Fe}(\text{O})(\text{BQEN})(\text{NCCH}_3)]^{3+} + e^- \rightarrow$<br>$^3[\text{Fe}(\text{O})(\text{BQEN})(\text{NCCH}_3)]^{2+} + \text{EA}$                    | -318.11    | -316.43                 | -191.32                               | -316.91    | -189.23                  |
| $^2[\text{Fe}(\text{O})(\text{BQEN})(\text{NCCH}_3)]^{3+} + \text{H} \rightarrow$<br>$^3[\text{Fe}(\text{OH})(\text{BQEN})(\text{NCCH}_3)]^{3+} + \text{BDE}_{\text{OH}}$ |            | 91.52                   | 96.89                                 | 84.37      | 86.45                    |

**Table S14: Absolute energies for the individual components of the thermodynamic cycles displayed in Fig 7. Data obtained after a UB3LYP/B1 geometry optimization in Jaguar followed by single points with solvent at UB3LYP/B2 and UB3LYP-D3.**

|                                               | E            | ZPE         | G            | E            | Esolv        |
|-----------------------------------------------|--------------|-------------|--------------|--------------|--------------|
|                                               | [in au, B1]  | [in au, B1] | [in au, B1]  | [in au, B2]  | [in au, B2]  |
| <sup>3</sup> [Fe(O)(BQEN)(OH)] <sup>+</sup>   | -1344.640154 | 0.426784    | -1344.263911 | -1345.236049 | -1344.701872 |
| <sup>2</sup> [Fe(O)(BQEN)(OH)] <sup>2+</sup>  | -1344.262697 | 0.426691    | -1343.886110 | -1344.850734 | -1344.448874 |
| <sup>4</sup> [Fe(O)(BQEN)(OH)] <sup>2+</sup>  | -1344.276599 | 0.427571    | -1343.899539 | -1344.866957 | -1344.462715 |
| <sup>2</sup> [Fe(O)(BQEN)(OH)] <sup>0</sup>   | -1344.783244 | 0.422066    | -1344.412137 | -1345.387793 | -1344.814723 |
| <sup>4</sup> [Fe(O)(BQEN)(OH)] <sup>0</sup>   | -1344.793373 | 0.421041    | -1344.426164 | -1345.403078 | -1344.824752 |
| <sup>3</sup> [Fe(OH)(BQEN)(OH)] <sup>2+</sup> | -1344.934494 | 0.438374    | -1344.546587 | -1345.529067 | -1345.122397 |
| <sup>2</sup> [Fe(OH)(BQEN)(OH)] <sup>+</sup>  | -1345.288254 | 0.437570    | -1344.901024 | -1345.887425 | -1345.347652 |
| <sup>4</sup> [Fe(OH)(BQEN)(OH)] <sup>+</sup>  | -1345.273599 | 0.435068    | -1344.891585 | -1345.877056 | -1345.333367 |

**Cartesian coordinates:**

**Gas-phase optimized geometries:**

|                 |              |              |              |   |              |              |              |
|-----------------|--------------|--------------|--------------|---|--------------|--------------|--------------|
| <sup>3</sup> 1: |              |              |              | 6 | 2.635251000  | 0.662788000  | 4.610927000  |
| 26              | 0.000000000  | 0.000000000  | 0.000000000  | 6 | 3.753262000  | 0.677373000  | 3.800536000  |
| 7               | 0.000000000  | 0.000000000  | 1.987721000  | 6 | 3.633151000  | 0.458576000  | 2.405234000  |
| 7               | 2.048457000  | 0.000000000  | 0.190792000  | 6 | 2.396134000  | 0.230067000  | 1.826050000  |
| 7               | 0.010434000  | -0.145226000 | -1.984366000 | 6 | 1.235328000  | 0.215123000  | 2.640852000  |
| 6               | -1.063272000 | -0.002981000 | 2.801967000  | 1 | -2.047668000 | -0.135894000 | 2.299475000  |
| 6               | -0.942827000 | 0.182394000  | 4.194980000  | 1 | -1.985884000 | 0.184253000  | 4.777570000  |
| 6               | 0.307477000  | 0.389048000  | 4.750736000  | 1 | 0.215957000  | 0.575108000  | 5.896259000  |
| 6               | 1.457002000  | 0.408121000  | 3.914832000  | 1 | 2.724295000  | 0.829656000  | 5.678789000  |
| 6               | 2.780068000  | 0.623541000  | 4.388653000  | 1 | 4.733847000  | 0.857602000  | 4.224811000  |
| 6               | 3.841560000  | 0.634941000  | 3.504035000  | 1 | 4.530024000  | 0.477804000  | 1.795740000  |
| 6               | 3.631987000  | 0.433838000  | 2.114977000  | 6 | -0.024196000 | 0.885206000  | -2.848574000 |
| 6               | 2.353981000  | 0.225833000  | 1.628005000  | 6 | -0.066634000 | 0.701903000  | -4.245274000 |
| 6               | 1.258793000  | 0.206580000  | 2.514598000  | 6 | -0.006812000 | -0.580684000 | -4.767057000 |
| 1               | -2.031037000 | -0.146170000 | 2.344022000  | 6 | 0.102807000  | -1.701548000 | -3.897874000 |
| 1               | -1.834553000 | 0.169075000  | 4.808734000  | 6 | 0.169589000  | -3.050335000 | -4.343320000 |
| 1               | 0.420699000  | 0.543137000  | 5.818506000  | 6 | 0.279704000  | -4.079790000 | -3.427446000 |
| 1               | 2.943711000  | 0.781851000  | 5.448923000  | 6 | 0.326469000  | -3.810896000 | -2.035080000 |
| 1               | 4.849728000  | 0.801899000  | 3.864100000  | 6 | 0.257486000  | -2.508186000 | -1.570960000 |
| 1               | 4.489718000  | 0.453442000  | 1.452221000  | 6 | 0.145855000  | -1.445567000 | -2.493028000 |
| 6               | -0.071521000 | 0.903163000  | -2.815153000 | 1 | -0.080951000 | 1.866788000  | -2.393751000 |
| 6               | -0.176006000 | 0.738882000  | -4.213095000 | 1 | -0.148319000 | 1.567291000  | -4.890796000 |
| 6               | -0.208471000 | -0.535973000 | -4.750442000 | 1 | -0.042553000 | -0.741474000 | -5.839272000 |
| 6               | -0.137623000 | -1.668767000 | -3.892693000 | 1 | 0.133060000  | -3.259857000 | -5.406491000 |
| 6               | -0.175767000 | -3.014401000 | -4.350954000 | 1 | 0.330350000  | -5.107812000 | -3.766487000 |
| 6               | -0.105082000 | -4.058708000 | -3.448586000 | 1 | 0.411936000  | -4.644225000 | -1.346140000 |
| 6               | 0.010682000  | -3.808572000 | -2.056450000 | 7 | 0.293581000  | -2.148107000 | -0.133354000 |
| 6               | 0.047084000  | -2.509751000 | -1.579545000 | 6 | 1.669172000  | -2.415549000 | 0.460851000  |
| 6               | -0.025918000 | -1.429980000 | -2.487834000 | 6 | 2.671939000  | -1.383899000 | -0.027537000 |
| 1               | -0.059342000 | 1.882799000  | -2.353656000 | 1 | 1.564431000  | -2.372628000 | 1.547702000  |
| 1               | -0.231457000 | 1.616945000  | -4.844216000 | 1 | 1.996329000  | -3.427402000 | 0.194970000  |
| 1               | -0.290530000 | -0.683410000 | -5.822125000 | 1 | 3.669129000  | -1.603520000 | 0.373841000  |
| 1               | -0.261038000 | -3.209048000 | -5.414466000 | 1 | 2.743967000  | -1.394724000 | -1.118855000 |
| 1               | -0.134757000 | -5.083869000 | -3.798313000 | 6 | -0.752338000 | -2.916761000 | 0.638443000  |
| 1               | 0.068860000  | -4.653359000 | -1.378932000 | 1 | -1.725742000 | -2.751784000 | 0.179843000  |
| 7               | 0.189332000  | -2.163759000 | -0.147578000 | 1 | -0.764359000 | -2.556206000 | 1.666602000  |
| 6               | 1.605858000  | -2.434597000 | 0.327252000  | 1 | -0.524586000 | -3.987412000 | 0.641232000  |
| 6               | 2.529887000  | -1.377728000 | -0.244087000 | 8 | -0.069483000 | 1.651262000  | -0.053635000 |
| 1               | 1.598415000  | -2.401593000 | 1.419760000  | 7 | -2.282215000 | -0.189458000 | -0.170502000 |
| 1               | 1.924856000  | -3.437734000 | 0.021547000  | 6 | -3.394517000 | 0.082626000  | -0.408834000 |
| 1               | 3.560731000  | -1.529901000 | 0.092851000  | 6 | -4.774065000 | 0.431769000  | -0.699683000 |
| 1               | 2.525110000  | -1.394938000 | -1.336330000 | 1 | -4.897379000 | 1.522486000  | -0.673816000 |
| 6               | -0.792260000 | -2.928438000 | 0.701153000  | 1 | -5.446987000 | -0.013646000 | 0.040460000  |
| 1               | -1.798131000 | -2.770233000 | 0.314555000  | 1 | -5.059530000 | 0.067029000  | -1.692079000 |
| 1               | -0.730263000 | -2.565248000 | 1.726474000  | 6 | 2.900818000  | 1.063797000  | -0.441030000 |
| 1               | -0.568558000 | -4.000094000 | 0.694674000  | 1 | 2.544724000  | 2.039801000  | -0.113528000 |
| 8               | -0.043663000 | 1.654364000  | -0.045087000 | 1 | 2.634969000  | 0.915406000  | -1.488249000 |
| 7               | -2.024503000 | -0.066565000 | -0.150335000 | 1 | 3.990754000  | 1.014722000  | -0.343772000 |
| 6               | -3.153422000 | 0.155311000  | -0.343003000 | 1 | -1.343867000 | 3.259608000  | 2.055953000  |
| 6               | -4.559901000 | 0.442761000  | -0.580229000 | 6 | -2.248843000 | 3.759911000  | 2.429242000  |
| 1               | -4.730933000 | 1.524735000  | -0.555937000 | 6 | -3.277125000 | 3.839300000  | 1.314868000  |
| 1               | -5.185755000 | -0.025441000 | 0.186961000  | 6 | -2.872444000 | 4.000696000  | -0.024825000 |
| 1               | -4.869219000 | 0.062822000  | -1.559657000 | 6 | -3.816788000 | 4.156972000  | -1.047647000 |
| 6               | 2.699759000  | 1.066790000  | -0.660947000 | 6 | -5.187358000 | 4.149165000  | -0.748327000 |
| 1               | 2.356938000  | 2.043026000  | -0.322324000 | 6 | -5.603576000 | 3.979722000  | 0.580920000  |
| 1               | 2.409806000  | 0.912869000  | -1.698428000 | 6 | -4.655119000 | 3.824549000  | 1.600336000  |
| 1               | 3.788416000  | 1.001691000  | -0.582868000 | 6 | -1.864019000 | 5.151181000  | 2.983591000  |
| <sup>5</sup> 1: |              |              |              | 1 | -1.810958000 | 4.026606000  | -0.258001000 |
| 26              | 0.000000000  | 0.000000000  | 0.000000000  | 1 | -3.487127000 | 4.312053000  | -2.070996000 |
| 7               | 0.000000000  | 0.000000000  | 2.060394000  | 1 | -5.920213000 | 4.298387000  | -1.534974000 |
| 7               | 2.230084000  | 0.000000000  | 0.383529000  | 1 | -6.661716000 | 3.987183000  | 0.824125000  |
| 7               | 0.079758000  | -0.153870000 | -2.005284000 | 1 | -4.986826000 | 3.713362000  | 2.629541000  |
| 6               | -1.107639000 | 0.004947000  | 2.814807000  | 1 | -2.643473000 | 3.146298000  | 3.251625000  |
| 6               | -1.063765000 | 0.197232000  | 4.210513000  | 1 | -2.741933000 | 5.667532000  | 3.386275000  |
| 6               | 0.156451000  | 0.412526000  | 4.825262000  | 1 | -1.439401000 | 5.782044000  | 2.194919000  |
| 6               | 1.348920000  | 0.432167000  | 4.051564000  | 1 | -1.123112000 | 5.062792000  | 3.786600000  |

<sup>3</sup>RC<sub>1</sub>:



|   |              |             |              |   |              |             |              |
|---|--------------|-------------|--------------|---|--------------|-------------|--------------|
| 6 | -5.061825000 | 3.778697000 | 1.126283000  | 1 | 3.998764000  | 1.053708000 | -0.279173000 |
| 6 | -3.774498000 | 3.499646000 | 1.597331000  | 1 | -0.760879000 | 2.659519000 | 0.728840000  |
| 6 | -0.242335000 | 4.628039000 | 1.201226000  | 6 | -1.154850000 | 3.593859000 | 1.399871000  |
| 1 | -1.978893000 | 4.449492000 | -1.146342000 | 6 | -2.591023000 | 3.794723000 | 1.072880000  |
| 1 | -4.256542000 | 4.923851000 | -1.984059000 | 6 | -3.006216000 | 4.440134000 | -0.116277000 |
| 1 | -6.235817000 | 4.524173000 | -0.529120000 | 6 | -4.361605000 | 4.633358000 | -0.388068000 |
| 1 | -5.920364000 | 3.620002000 | 1.770742000  | 6 | -5.336466000 | 4.178678000 | 0.514930000  |
| 1 | -3.640677000 | 3.123169000 | 2.607898000  | 6 | -4.944043000 | 3.518371000 | 1.690227000  |
| 1 | -1.310630000 | 3.116481000 | 2.361696000  | 6 | -3.587865000 | 3.320253000 | 1.958689000  |
| 1 | -0.548105000 | 5.491199000 | 1.806064000  | 6 | -0.171451000 | 4.721379000 | 1.085021000  |
| 1 | -0.138520000 | 4.969180000 | 0.166424000  | 1 | -2.264640000 | 4.807594000 | -0.817500000 |
| 1 | 0.742297000  | 4.302057000 | 1.551653000  | 1 | -4.662692000 | 5.151966000 | -1.292122000 |

<sup>5</sup>TS<sub>HA</sub>:

|    |              |              |              |
|----|--------------|--------------|--------------|
| 26 | 0.000000000  | 0.000000000  | 0.000000000  |
| 7  | 0.000000000  | 0.000000000  | 2.073632000  |
| 7  | 2.242388000  | 0.000000000  | 0.408033000  |
| 7  | 0.124377000  | -0.113653000 | -2.017761000 |
| 6  | -1.103784000 | -0.028333000 | 2.831893000  |
| 6  | -1.062431000 | 0.134205000  | 4.232550000  |
| 6  | 0.155859000  | 0.348748000  | 4.851277000  |
| 6  | 1.347771000  | 0.391356000  | 4.077676000  |
| 6  | 2.633181000  | 0.606279000  | 4.645573000  |
| 6  | 3.753655000  | 0.626000000  | 3.839161000  |
| 6  | 3.635860000  | 0.426978000  | 2.440617000  |
| 6  | 2.399956000  | 0.219341000  | 1.850926000  |
| 6  | 1.234519000  | 0.203569000  | 2.661841000  |
| 1  | -2.042794000 | -0.174040000 | 2.314486000  |
| 1  | -1.982760000 | 0.092181000  | 4.801477000  |
| 1  | 0.215747000  | 0.485477000  | 5.925920000  |
| 1  | 2.719720000  | 0.751508000  | 5.716904000  |
| 1  | 4.734657000  | 0.789772000  | 4.269365000  |
| 1  | 4.535537000  | 0.441191000  | 1.835015000  |
| 6  | 0.033073000  | 0.936971000  | -2.844254000 |
| 6  | 0.049225000  | 0.780724000  | -4.246236000 |
| 6  | 0.156089000  | -0.488876000 | -4.788745000 |
| 6  | 0.252424000  | -1.624259000 | -3.936489000 |
| 6  | 0.366371000  | -2.960930000 | -4.407594000 |
| 6  | 0.461025000  | -4.007600000 | -3.510175000 |
| 6  | 0.447870000  | -3.766695000 | -2.112142000 |
| 6  | 0.334422000  | -2.476722000 | -1.622161000 |
| 6  | 0.234401000  | -1.394355000 | -2.525821000 |
| 1  | -0.056671000 | 1.903728000  | -2.364026000 |
| 1  | -0.022514000 | 1.656390000  | -4.878910000 |
| 1  | 0.168242000  | -0.630545000 | -5.864273000 |
| 1  | 0.379314000  | -3.147131000 | -5.475997000 |
| 1  | 0.548874000  | -5.026614000 | -3.868130000 |
| 1  | 0.526819000  | -4.612146000 | -1.437296000 |
| 7  | 0.321462000  | -2.153739000 | -0.176666000 |
| 6  | 1.683002000  | -2.416392000 | 0.448688000  |
| 6  | 2.694399000  | -1.377446000 | -0.007534000 |
| 1  | 1.551041000  | -2.381181000 | 1.533163000  |
| 1  | 2.022921000  | -3.425258000 | 0.185905000  |
| 1  | 3.684414000  | -1.604183000 | 0.408664000  |
| 1  | 2.786479000  | -1.377853000 | -1.097266000 |
| 6  | -0.731503000 | -2.952082000 | 0.548194000  |
| 1  | -1.692121000 | -2.803357000 | 0.057742000  |
| 1  | -0.788163000 | -2.601267000 | 1.578734000  |
| 1  | -0.484691000 | -4.019041000 | 0.550704000  |
| 8  | -0.097333000 | 1.730480000  | -0.095915000 |
| 7  | -2.310895000 | -0.200524000 | -0.195135000 |
| 6  | -3.427110000 | 0.045698000  | -0.440245000 |
| 6  | -4.815756000 | 0.365147000  | -0.733447000 |
| 1  | -5.060686000 | 1.358001000  | -0.339484000 |
| 1  | -5.484610000 | -0.371073000 | -0.275221000 |
| 1  | -4.988323000 | 0.363741000  | -1.814694000 |
| 6  | 2.910392000  | 1.071828000  | -0.404601000 |
| 1  | 2.514296000  | 2.039006000  | -0.098969000 |
| 1  | 2.675290000  | 0.909037000  | -1.457024000 |

|   |              |             |              |
|---|--------------|-------------|--------------|
| 1 | 3.998764000  | 1.053708000 | -0.279173000 |
| 1 | -0.760879000 | 2.659519000 | 0.728840000  |
| 6 | -1.154850000 | 3.593859000 | 1.399871000  |
| 6 | -2.591023000 | 3.794723000 | 1.072880000  |
| 6 | -3.006216000 | 4.440134000 | -0.116277000 |
| 6 | -4.361605000 | 4.633358000 | -0.388068000 |
| 6 | -5.336466000 | 4.178678000 | 0.514930000  |
| 6 | -4.944043000 | 3.518371000 | 1.690227000  |
| 6 | -3.587865000 | 3.320253000 | 1.958689000  |
| 6 | -0.171451000 | 4.721379000 | 1.085021000  |
| 1 | -2.264640000 | 4.807594000 | -0.817500000 |
| 1 | -4.662692000 | 5.151966000 | -1.292122000 |
| 1 | -6.388139000 | 4.353115000 | 0.313405000  |
| 1 | -5.692980000 | 3.185119000 | 2.401374000  |
| 1 | -3.285997000 | 2.832953000 | 2.882039000  |
| 1 | -1.028612000 | 3.225874000 | 2.425694000  |
| 1 | -0.401734000 | 5.605531000 | 1.692996000  |
| 1 | -0.206574000 | 5.023410000 | 0.033924000  |
| 1 | 0.854377000  | 4.415166000 | 1.312085000  |

<sup>3</sup>I:

|    |              |              |              |
|----|--------------|--------------|--------------|
| 26 | 0.000000000  | 0.000000000  | 0.000000000  |
| 7  | 0.000000000  | 0.000000000  | 1.981731000  |
| 7  | 2.273563000  | 0.000000000  | 0.359931000  |
| 7  | 0.059444000  | -0.119456000 | -1.997379000 |
| 6  | -1.115164000 | -0.046403000 | 2.728021000  |
| 6  | -1.089768000 | 0.081216000  | 4.130988000  |
| 6  | 0.120713000  | 0.283680000  | 4.770337000  |
| 6  | 1.322134000  | 0.349403000  | 4.013797000  |
| 6  | 2.597207000  | 0.563640000  | 4.605368000  |
| 6  | 3.729704000  | 0.608295000  | 3.816808000  |
| 6  | 3.634775000  | 0.427844000  | 2.414279000  |
| 6  | 2.410115000  | 0.218204000  | 1.800286000  |
| 6  | 1.232592000  | 0.188195000  | 2.592652000  |
| 1  | -2.045263000 | -0.182804000 | 2.192883000  |
| 1  | -2.017234000 | 0.022450000  | 4.686468000  |
| 1  | 0.166895000  | 0.393124000  | 5.848860000  |
| 1  | 2.665715000  | 0.689000000  | 5.680516000  |
| 1  | 4.702184000  | 0.773832000  | 4.265431000  |
| 1  | 4.542408000  | 0.454383000  | 1.820923000  |
| 6  | -0.067098000 | 0.933410000  | -2.810350000 |
| 6  | -0.062144000 | 0.790373000  | -4.216693000 |
| 6  | 0.071340000  | -0.467465000 | -4.776101000 |
| 6  | 0.207248000  | -1.606818000 | -3.933912000 |
| 6  | 0.352748000  | -2.937732000 | -4.412470000 |
| 6  | 0.486025000  | -3.986693000 | -3.522283000 |
| 6  | 0.482954000  | -3.755261000 | -2.122303000 |
| 6  | 0.340171000  | -2.470684000 | -1.627546000 |
| 6  | 0.199174000  | -1.387980000 | -2.522218000 |
| 1  | -0.175154000 | 1.889373000  | -2.312661000 |
| 1  | -0.162651000 | 1.671763000  | -4.837602000 |
| 1  | 0.075945000  | -0.598616000 | -5.853088000 |
| 1  | 0.359513000  | -3.118246000 | -5.481979000 |
| 1  | 0.597657000  | -5.000719000 | -3.887906000 |
| 1  | 0.594208000  | -4.601885000 | -1.453520000 |
| 7  | 0.343873000  | -2.145219000 | -0.181494000 |
| 6  | 1.712920000  | -2.410772000 | 0.423531000  |
| 6  | 2.722607000  | -1.374388000 | -0.047628000 |
| 1  | 1.597667000  | -2.376329000 | 1.509983000  |
| 1  | 2.045319000  | -3.420322000 | 0.155193000  |
| 1  | 3.715485000  | -1.607151000 | 0.360780000  |
| 1  | 2.804520000  | -1.383212000 | -1.138250000 |
| 6  | -0.702167000 | -2.947753000 | 0.551511000  |
| 1  | -1.673604000 | -2.764214000 | 0.095761000  |
| 1  | -0.721584000 | -2.632357000 | 1.594854000  |
| 1  | -0.473226000 | -4.017547000 | 0.510112000  |
| 8  | -0.205957000 | 1.772320000  | -0.134762000 |
| 7  | -2.411068000 | -0.284299000 | -0.250460000 |
| 6  | -3.499474000 | -0.014525000 | -0.583948000 |

6 -4.855863000 0.330052000 -0.987105000  
 1 -5.116507000 1.325268000 -0.611962000  
 1 -5.572207000 -0.393798000 -0.584867000  
 1 -4.943881000 0.332222000 -2.078391000  
 6 2.925626000 1.073120000 -0.455553000  
 1 2.511345000 2.036195000 -0.159874000  
 1 2.691514000 0.900297000 -1.507126000  
 1 4.015447000 1.080400000 -0.333054000  
 1 -0.664827000 2.359679000 0.518786000  
 6 -1.217460000 4.294050000 1.324553000  
 6 -2.592490000 4.063533000 1.601423000  
 6 -3.628856000 4.312221000 0.647168000  
 6 -4.964606000 4.108847000 0.979725000  
 6 -5.319145000 3.650157000 2.262037000  
 6 -4.318500000 3.395605000 3.218032000  
 6 -2.981888000 3.595126000 2.897635000  
 6 -0.667179000 4.955360000 0.101881000  
 1 -3.374633000 4.691382000 -0.335973000  
 1 -5.740688000 4.334222000 0.255438000  
 1 -6.363669000 3.512722000 2.520114000  
 1 -4.595944000 3.065924000 4.213550000  
 1 -2.211301000 3.425047000 3.644396000  
 1 -0.522712000 4.149486000 2.152083000  
 1 -0.655174000 6.049994000 0.235704000  
 1 -1.252055000 4.750436000 -0.799661000  
 1 0.366585000 4.649620000 -0.083694496

<sup>3</sup>P:

26 0.000000000 0.000000000 0.000000000  
 7 0.000000000 0.000000000 1.989435000  
 7 2.225277000 0.000000000 0.361378000  
 7 -0.055560000 -0.049066000 -1.978104000  
 6 -1.116109000 -0.033663000 2.733226000  
 6 -1.089941000 0.039323000 4.142857000  
 6 0.125902000 0.169273000 4.792946000  
 6 1.330853000 0.217873000 4.039132000  
 6 2.617568000 0.363907000 4.627882000  
 6 3.744839000 0.401714000 3.831145000  
 6 3.637691000 0.287229000 2.420996000  
 6 2.401174000 0.147864000 1.814149000  
 6 1.231066000 0.117422000 2.614641000  
 1 -2.056426000 -0.097298000 2.197178000  
 1 -2.021033000 -0.000750000 4.694339000  
 1 0.172639000 0.238038000 5.875128000  
 1 2.699862000 0.445879000 5.706483000  
 1 4.725133000 0.515113000 4.278759000  
 1 4.543539000 0.311924000 1.824961000  
 6 -0.208496000 1.016247000 -2.779539000  
 6 -0.226425000 0.906162000 -4.187144000  
 6 -0.093477000 -0.339714000 -4.775384000  
 6 0.059980000 -1.495040000 -3.958853000  
 6 0.196552000 -2.813017000 -4.476768000  
 6 0.345773000 -3.886128000 -3.619023000  
 6 0.371036000 -3.689696000 -2.214034000  
 6 0.241513000 -2.418346000 -1.679039000  
 6 0.079733000 -1.308427000 -2.541400000  
 1 -0.330347000 1.972695000 -2.287969000  
 1 -0.345339000 1.800815000 -4.786318000  
 1 -0.105438000 -0.449156000 -5.855046000  
 1 0.182326000 -2.963422000 -5.551102000  
 1 0.447716000 -4.890577000 -4.014343000  
 1 0.492375000 -4.553204000 -1.568083000  
 7 0.271005000 -2.141003000 -0.227030000  
 6 1.638285000 -2.429400000 0.356885000  
 6 2.641491000 -1.378722000 -0.101510000  
 1 1.537283000 -2.423662000 1.445089000  
 1 1.977171000 -3.429644000 0.059258000  
 1 3.643230000 -1.623075000 0.277746000  
 1 2.696954000 -1.352151000 -1.193672000

6 -0.797998000 -2.919662000 0.495983000  
 1 -1.768885000 -2.692695000 0.051130000  
 1 -0.798597000 -2.631071000 1.547194000  
 1 -0.621931000 -3.998369000 0.427552000  
 8 -1.236320000 1.628512000 0.000124000  
 7 -3.748053000 0.935320000 -0.954400000  
 6 -4.886861000 0.901778000 -1.213157000  
 6 -6.307136000 0.880390000 -1.530200000  
 1 -6.749536000 1.860968000 -1.333644000  
 1 -6.827016000 0.137477000 -0.917788000  
 1 -6.463709000 0.631815000 -2.584179000  
 6 2.959710000 1.055193000 -0.415006000  
 1 2.701868000 2.038274000 -0.018909000  
 1 2.659114000 0.995336000 -1.462728000  
 1 4.047225000 0.925331000 -0.355870000  
 1 -2.152776000 1.463655000 -0.378182000  
 6 -1.161499000 2.922758000 0.824324000  
 6 -2.531386000 3.539526000 1.024340000  
 6 -3.202945000 4.200808000 -0.021115000  
 6 -4.453783000 4.782375000 0.198193000  
 6 -5.048740000 4.717046000 1.465946000  
 6 -4.387206000 4.064528000 2.513579000  
 6 -3.138063000 3.479208000 2.291088000  
 6 -0.152701000 3.840001000 0.144171000  
 1 -2.751201000 4.275206000 -1.004934000  
 1 -4.954188000 5.304690000 -0.610857000  
 1 -6.010241000 5.185096000 1.639553000  
 1 -4.835557000 4.024860000 3.500725000  
 1 -2.620437000 2.990485000 3.113426000  
 1 -0.772194000 2.614832000 1.801242000  
 1 -0.002747000 4.736509000 0.752492000  
 1 -0.495305000 4.162540000 -0.844967000  
 1 0.814890000 3.338600000 0.033715000

<sup>5</sup>P:

26 0.000000000 0.000000000 0.000000000  
 7 0.000000000 0.000000000 2.168169000  
 7 2.252570000 0.000000000 0.468366000  
 7 0.021584000 -0.271061000 -2.130483000  
 6 -1.084819000 -0.058544000 2.955184000  
 6 -1.025966000 0.099021000 4.356103000  
 6 0.199875000 0.336596000 4.949876000  
 6 1.377736000 0.404771000 4.153687000  
 6 2.665360000 0.647124000 4.706034000  
 6 3.774250000 0.690953000 3.884013000  
 6 3.641006000 0.482429000 2.488692000  
 6 2.403518000 0.246283000 1.910540000  
 6 1.243299000 0.214200000 2.738356000  
 1 -2.031241000 -0.233191000 2.456588000  
 1 -1.934849000 0.037121000 4.942840000  
 1 0.278267000 0.470489000 6.023650000  
 1 2.762125000 0.793623000 5.776212000  
 1 4.758119000 0.876748000 4.299263000  
 1 4.534889000 0.508539000 1.874019000  
 6 -0.232018000 0.681582000 -3.034916000  
 6 -0.248766000 0.431265000 -4.424703000  
 6 0.010828000 -0.846134000 -4.879924000  
 6 0.264982000 -1.891812000 -3.950012000  
 6 0.520007000 -3.231675000 -4.346901000  
 6 0.735603000 -4.207852000 -3.395292000  
 6 0.693215000 -3.886494000 -2.015298000  
 6 0.448323000 -2.592195000 -1.590010000  
 6 0.246763000 -1.566634000 -2.554446000  
 1 -0.430811000 1.670831000 -2.644396000  
 1 -0.459741000 1.240463000 -5.111519000  
 1 0.015868000 -1.067534000 -5.941912000  
 1 0.538886000 -3.475265000 -5.403873000  
 1 0.931175000 -5.229975000 -3.695446000  
 1 0.845290000 -4.680368000 -1.291890000

|    |              |              |              |    |              |              |              |
|----|--------------|--------------|--------------|----|--------------|--------------|--------------|
| 7  | 0.365908000  | -2.244990000 | -0.159261000 | 6  | -0.032626000 | -1.392178000 | -2.497545000 |
| 6  | 1.685691000  | -2.443578000 | 0.546831000  | 1  | 0.048200000  | 1.909585000  | -2.337163000 |
| 6  | 2.695314000  | -1.398946000 | 0.097446000  | 1  | -0.112439000 | 1.663648000  | -4.846482000 |
| 1  | 1.496939000  | -2.366036000 | 1.620528000  | 1  | -0.246825000 | -0.627325000 | -5.831008000 |
| 1  | 2.077994000  | -3.449957000 | 0.353108000  | 1  | -0.303863000 | -3.159347000 | -5.428921000 |
| 1  | 3.679349000  | -1.611298000 | 0.535112000  | 1  | -0.245686000 | -5.038181000 | -3.814018000 |
| 1  | 2.803325000  | -1.424371000 | -0.990370000 | 1  | -0.036652000 | -4.620510000 | -1.395407000 |
| 6  | -0.722483000 | -3.022396000 | 0.528124000  | 7  | 0.165143000  | -2.129072000 | -0.156047000 |
| 1  | -1.660807000 | -2.868923000 | -0.004770000 | 6  | 1.588305000  | -2.425147000 | 0.300942000  |
| 1  | -0.822518000 | -2.657546000 | 1.551125000  | 6  | 2.523050000  | -1.380896000 | -0.273044000 |
| 1  | -0.498335000 | -4.094789000 | 0.555647000  | 1  | 1.592284000  | -2.403936000 | 1.393719000  |
| 8  | -0.451546000 | 2.146140000  | 0.062465000  | 1  | 1.880199000  | -3.431555000 | -0.018149000 |
| 7  | -2.326881000 | -0.090329000 | -0.211237000 | 1  | 3.553385000  | -1.551966000 | 0.056277000  |
| 6  | -3.436375000 | -0.059536000 | -0.579082000 | 1  | 2.511385000  | -1.394871000 | -1.364941000 |
| 6  | -4.821570000 | -0.024207000 | -1.029855000 | 6  | -0.804357000 | -2.904627000 | 0.699864000  |
| 1  | -5.057154000 | 0.956823000  | -1.454150000 | 1  | -1.813180000 | -2.771030000 | 0.313373000  |
| 1  | -5.501780000 | -0.213399000 | -0.192514000 | 1  | -0.745983000 | -2.539114000 | 1.723959000  |
| 1  | -4.997414000 | -0.786682000 | -1.795015000 | 1  | -0.560018000 | -3.971168000 | 0.695927000  |
| 6  | 3.001233000  | 0.998271000  | -0.363663000 | 8  | -0.000532000 | 1.844531000  | -0.056198000 |
| 1  | 2.758700000  | 2.004740000  | -0.024654000 | 7  | -2.012240000 | -0.097481000 | -0.117422000 |
| 1  | 2.696966000  | 0.881423000  | -1.405790000 | 6  | -3.158072000 | -0.158530000 | -0.331601000 |
| 1  | 4.087137000  | 0.857241000  | -0.300744000 | 6  | -4.587032000 | -0.240276000 | -0.599187000 |
| 1  | -1.192630000 | 2.164396000  | 0.705074000  | 1  | -5.103042000 | 0.648617000  | -0.220244000 |
| 6  | 0.195883000  | 3.548648000  | 0.118494000  | 1  | -5.020585000 | -1.122233000 | -0.114912000 |
| 6  | -0.821419000 | 4.496833000  | 0.709011000  | 1  | -4.769629000 | -0.313430000 | -1.676880000 |
| 6  | -1.788615000 | 5.149564000  | -0.077880000 | 6  | 2.713330000  | 1.061931000  | -0.677350000 |
| 6  | -2.725254000 | 6.000348000  | 0.515857000  | 1  | 2.309176000  | 2.027164000  | -0.382859000 |
| 6  | -2.712910000 | 6.207560000  | 1.902593000  | 1  | 2.478738000  | 0.870853000  | -1.722793000 |
| 6  | -1.759795000 | 5.557300000  | 2.696120000  | 1  | 3.799026000  | 1.039764000  | -0.549837000 |
| 6  | -0.818709000 | 4.710431000  | 2.101832000  | 1  | -0.729399000 | 2.280591000  | 0.433763000  |
| 6  | 0.708320000  | 3.871947000  | -1.273207000 | 6  | -0.275887000 | 5.226763000  | 0.095537000  |
| 1  | -1.808243000 | 5.013152000  | -1.153340000 | 6  | 0.273008000  | 6.497150000  | 0.241625000  |
| 1  | -3.455489000 | 6.510089000  | -0.102498000 | 6  | -0.443009000 | 7.705189000  | -0.096610000 |
| 1  | -3.434881000 | 6.877542000  | 2.359545000  | 6  | 0.149476000  | 8.939807000  | 0.086770000  |
| 1  | -1.736006000 | 5.727495000  | 3.766854000  | 6  | 1.463826000  | 9.020440000  | 0.603065000  |
| 1  | -0.058750000 | 4.233252000  | 2.717503000  | 6  | 2.194333000  | 7.859093000  | 0.940690000  |
| 1  | 1.029848000  | 3.432256000  | 0.817270000  | 6  | 1.615089000  | 6.617222000  | 0.764639000  |
| 1  | 1.274558000  | 4.808717000  | -1.244032000 | 6  | -1.631561000 | 4.885932000  | -0.392739000 |
| 1  | -0.108610000 | 3.995419000  | -1.988168000 | 1  | -1.448544000 | 7.649010000  | -0.495194000 |
| 1  | 1.374454000  | 3.088222000  | -1.643182000 | 1  | -0.385162000 | 9.848038000  | -0.164701000 |
| 2: |              |              |              | 1  | 1.920761000  | 9.995519000  | 0.740938000  |
| 26 | 0.000000000  | 0.000000000  | 0.000000000  | 1  | 3.199511000  | 7.951015000  | 1.333959000  |
| 7  | 0.000000000  | 0.000000000  | 1.983425000  | 1  | 2.161676000  | 5.715078000  | 1.020801000  |
| 7  | 2.057305000  | 0.000000000  | 0.168783000  | 1  | 0.352949000  | 4.378955000  | 0.371798000  |
| 7  | 0.036731000  | -0.111759000 | -1.987188000 | 1  | -2.156999000 | 5.703938000  | -0.885073000 |
| 6  | -1.052607000 | -0.040600000 | 2.815992000  | 1  | -2.252253000 | 4.563431000  | 0.461592000  |
| 6  | -0.915947000 | 0.091011000  | 4.212230000  | 1  | -1.578656000 | 4.026852000  | -1.072418000 |
| 6  | 0.343452000  | 0.275232000  | 4.758841000  | 4: |              |              |              |
| 6  | 1.482276000  | 0.325675000  | 3.909758000  | 26 | 0.000000000  | 0.000000000  | 0.000000000  |
| 6  | 2.811146000  | 0.505154000  | 4.383754000  | 7  | 0.000000000  | 0.000000000  | 1.996212000  |
| 6  | 3.867392000  | 0.531074000  | 3.493187000  | 7  | 2.058065000  | 0.000000000  | 0.212557000  |
| 6  | 3.645216000  | 0.376658000  | 2.099751000  | 7  | 0.027200000  | -0.102428000 | -1.984736000 |
| 6  | 2.362056000  | 0.206892000  | 1.608878000  | 6  | -1.074969000 | -0.002119000 | 2.811931000  |
| 6  | 1.269635000  | 0.180123000  | 2.502556000  | 6  | -0.961828000 | 0.205207000  | 4.197861000  |
| 1  | -2.025855000 | -0.181114000 | 2.367669000  | 6  | 0.294534000  | 0.431239000  | 4.762117000  |
| 1  | -1.798192000 | 0.044095000  | 4.838391000  | 6  | 1.439436000  | 0.439312000  | 3.926092000  |
| 1  | 0.471169000  | 0.378369000  | 5.831336000  | 6  | 2.763476000  | 0.664457000  | 4.402628000  |
| 1  | 2.983719000  | 0.613765000  | 5.448963000  | 6  | 3.847125000  | 0.660325000  | 3.512420000  |
| 1  | 4.881220000  | 0.660894000  | 3.853022000  | 6  | 3.645970000  | 0.437177000  | 2.138628000  |
| 1  | 4.501581000  | 0.388582000  | 1.434711000  | 6  | 2.354422000  | 0.220909000  | 1.643862000  |
| 6  | 0.000671000  | 0.940296000  | -2.815107000 | 6  | 1.249057000  | 0.215252000  | 2.529655000  |
| 6  | -0.095793000 | 0.784520000  | -4.214425000 | 1  | -2.038676000 | -0.156540000 | 2.350166000  |
| 6  | -0.168791000 | -0.487147000 | -4.757948000 | 1  | -1.854347000 | 0.197573000  | 4.811600000  |
| 6  | -0.142223000 | -1.624341000 | -3.903803000 | 1  | 0.397272000  | 0.604951000  | 5.828522000  |
| 6  | -0.219742000 | -2.967639000 | -4.364752000 | 1  | 2.929388000  | 0.837943000  | 5.461160000  |
| 6  | -0.186643000 | -4.014825000 | -3.462807000 | 1  | 4.850611000  | 0.832922000  | 3.884200000  |
| 6  | -0.068724000 | -3.771317000 | -2.068997000 | 1  | 4.505066000  | 0.445074000  | 1.477785000  |
| 6  | 0.005653000  | -2.473866000 | -1.591890000 | 6  | -0.056385000 | 0.971298000  | -2.799947000 |



|   |              |              |              |   |              |              |              |
|---|--------------|--------------|--------------|---|--------------|--------------|--------------|
| 6 | -0.161308000 | 0.834709000  | -4.195932000 | 1 | -0.294857000 | -3.314414000 | -5.354841000 |
| 6 | -0.191519000 | -0.438853000 | -4.764213000 | 1 | -0.179659000 | -5.160278000 | -3.704899000 |
| 6 | -0.114253000 | -1.580619000 | -3.924538000 | 1 | 0.045608000  | -4.687614000 | -1.297210000 |
| 6 | -0.137641000 | -2.919990000 | -4.408615000 | 7 | 0.206902000  | -2.176632000 | -0.110989000 |
| 6 | -0.055608000 | -3.997631000 | -3.516160000 | 6 | 1.637104000  | -2.436705000 | -0.332304000 |
| 6 | 0.056066000  | -3.775946000 | -2.130751000 | 6 | 2.537141000  | -1.373457000 | -0.259623000 |
| 6 | 0.078568000  | -2.471982000 | -1.624810000 | 1 | 1.655195000  | -2.406853000 | 1.424733000  |
| 6 | -0.004280000 | -1.369760000 | -2.516509000 | 1 | 1.955414000  | -3.436943000 | 0.017796000  |
| 1 | -0.047522000 | 1.942346000  | -2.320444000 | 1 | 3.576701000  | -1.515397000 | 0.053753000  |
| 1 | -0.219021000 | 1.723243000  | -4.813032000 | 1 | 2.508211000  | -1.386669000 | -1.351274000 |
| 1 | -0.274160000 | -0.560952000 | -5.839336000 | 6 | -0.741624000 | -2.946846000 | 0.772334000  |
| 1 | -0.214158000 | -3.101821000 | -5.475899000 | 1 | -1.757803000 | -2.824572000 | 0.401275000  |
| 1 | -0.074236000 | -5.013112000 | -3.894986000 | 1 | -0.669928000 | -2.563024000 | 1.789282000  |
| 1 | 0.120804000  | -4.631434000 | -1.467696000 | 1 | -0.490469000 | -4.012065000 | 0.783241000  |
| 7 | 0.195645000  | -2.155017000 | -0.191721000 | 8 | -0.066419000 | 1.662026000  | -0.061488000 |
| 6 | 1.609051000  | -2.443379000 | 0.305599000  | 7 | -2.018652000 | -0.177307000 | -0.164795000 |
| 6 | 2.549429000  | -1.380910000 | -0.228320000 | 6 | -3.164771000 | -0.173364000 | -0.383459000 |
| 1 | 1.572367000  | -2.433821000 | 1.398441000  | 6 | -4.595817000 | -0.171140000 | -0.650500000 |
| 1 | 1.930911000  | -3.443263000 | -0.006813000 | 1 | -5.080206000 | 0.669712000  | -0.142680000 |
| 1 | 3.573263000  | -1.542756000 | 0.124899000  | 1 | -5.055611000 | -1.100316000 | -0.296642000 |
| 1 | 2.572250000  | -1.375206000 | -1.320973000 | 1 | -4.783169000 | -0.081169000 | -1.725949000 |
| 6 | -0.809556000 | -2.938404000 | 0.624623000  | 6 | 2.709285000  | 1.071711000  | -0.643611000 |
| 1 | -1.806463000 | -2.783443000 | 0.214847000  | 1 | 2.367683000  | 2.044413000  | -0.295691000 |
| 1 | -0.774455000 | -2.576518000 | 1.652366000  | 1 | 2.423570000  | 0.929765000  | -1.684058000 |
| 1 | -0.575758000 | -4.007249000 | 0.622607000  | 1 | 3.797533000  | 1.003344000  | -0.562050000 |
| 8 | -0.037884000 | 1.657285000  | -0.013576000 | 1 | 0.053573000  | 4.647746000  | 0.205124000  |
| 7 | -2.017748000 | -0.065268000 | -0.153126000 | 6 | -0.763139000 | 5.389863000  | 0.095850000  |
| 6 | -3.149444000 | 0.169931000  | -0.325207000 | 6 | -0.194845000 | 6.772940000  | 0.145988000  |
| 6 | -4.557770000 | 0.470209000  | -0.527712000 | 6 | -0.483545000 | 7.765448000  | -0.850478000 |
| 1 | -4.724002000 | 1.552559000  | -0.469048000 | 6 | 0.026752000  | 9.040421000  | -0.732109000 |
| 1 | -5.173133000 | -0.016557000 | 0.237694000  | 6 | 0.854239000  | 9.382878000  | 0.390565000  |
| 1 | -4.890835000 | 0.120245000  | -1.511184000 | 6 | 1.159599000  | 8.412559000  | 1.388838000  |
| 6 | 2.720636000  | 1.079384000  | -0.629077000 | 6 | 0.650057000  | 7.139667000  | 1.270537000  |
| 1 | 2.391358000  | 2.056498000  | -0.278303000 | 6 | -1.636439000 | 5.022878000  | -1.109131000 |
| 1 | 2.417602000  | 0.938247000  | -1.665219000 | 1 | -1.113659000 | 7.509235000  | -1.692235000 |
| 1 | 3.809114000  | 1.000715000  | -0.566766000 | 1 | -0.192521000 | 9.796647000  | -1.477424000 |

<sup>2</sup>RC<sub>2</sub>:

|    |              |              |              |
|----|--------------|--------------|--------------|
| 26 | 0.000000000  | 0.000000000  | 0.000000000  |
| 7  | 0.000000000  | 0.000000000  | 1.986305000  |
| 7  | 2.051967000  | 0.000000000  | 0.193499000  |
| 7  | 0.017867000  | -0.187385000 | -1.983105000 |
| 6  | -1.064034000 | -0.017441000 | 2.800394000  |
| 6  | -0.940159000 | 0.107938000  | 4.200013000  |
| 6  | 0.314169000  | 0.267311000  | 4.763826000  |
| 6  | 1.463722000  | 0.306814000  | 3.928043000  |
| 6  | 2.791106000  | 0.474787000  | 4.410314000  |
| 6  | 3.853537000  | 0.503651000  | 3.526354000  |
| 6  | 3.640881000  | 0.362104000  | 2.129944000  |
| 6  | 2.358877000  | 0.196559000  | 1.635354000  |
| 6  | 1.262307000  | 0.167334000  | 2.519916000  |
| 1  | -2.033470000 | -0.131951000 | 2.337790000  |
| 1  | -1.831027000 | 0.076646000  | 4.814503000  |
| 1  | 0.430304000  | 0.363779000  | 5.838111000  |
| 1  | 2.958809000  | 0.576075000  | 5.476988000  |
| 1  | 4.865268000  | 0.628522000  | 3.893719000  |
| 1  | 4.500850000  | 0.381756000  | 1.469698000  |
| 6  | -0.055934000 | 0.843012000  | -2.836951000 |
| 6  | -0.163870000 | 0.652680000  | -4.229966000 |
| 6  | -0.211408000 | -0.632836000 | -4.741785000 |
| 6  | -0.149908000 | -1.747512000 | -3.861937000 |
| 6  | -0.203489000 | -3.100842000 | -4.295747000 |
| 6  | -0.138858000 | -4.129079000 | -3.374699000 |
| 6  | -0.011896000 | -3.853794000 | -1.988213000 |
| 6  | 0.039603000  | -2.546408000 | -1.535373000 |
| 6  | -0.030462000 | -1.482529000 | -2.461118000 |
| 1  | -0.035606000 | 1.829944000  | -2.394022000 |
| 1  | -0.210754000 | 1.516201000  | -4.881361000 |
| 1  | -0.297486000 | -0.800634000 | -5.809970000 |

|   |              |              |              |
|---|--------------|--------------|--------------|
| 1 | -0.294857000 | -3.314414000 | -5.354841000 |
| 1 | -0.179659000 | -5.160278000 | -3.704899000 |
| 1 | 0.045608000  | -4.687614000 | -1.297210000 |
| 7 | 0.206902000  | -2.176632000 | -0.110989000 |
| 6 | 1.637104000  | -2.436705000 | -0.332304000 |
| 6 | 2.537141000  | -1.373457000 | -0.259623000 |
| 1 | 1.655195000  | -2.406853000 | 1.424733000  |
| 1 | 1.955414000  | -3.436943000 | 0.017796000  |
| 1 | 3.576701000  | -1.515397000 | 0.053753000  |
| 1 | 2.508211000  | -1.386669000 | -1.351274000 |
| 6 | -0.741624000 | -2.946846000 | 0.772334000  |
| 1 | -1.757803000 | -2.824572000 | 0.401275000  |
| 1 | -0.669928000 | -2.563024000 | 1.789282000  |
| 1 | -0.490469000 | -4.012065000 | 0.783241000  |
| 8 | -0.066419000 | 1.662026000  | -0.061488000 |
| 7 | -2.018652000 | -0.177307000 | -0.164795000 |
| 6 | -3.164771000 | -0.173364000 | -0.383459000 |
| 6 | -4.595817000 | -0.171140000 | -0.650500000 |
| 1 | -5.080206000 | 0.669712000  | -0.142680000 |
| 1 | -5.055611000 | -1.100316000 | -0.296642000 |
| 1 | -4.783169000 | -0.081169000 | -1.725949000 |
| 6 | 2.709285000  | 1.071711000  | -0.643611000 |
| 1 | 2.367683000  | 2.044413000  | -0.295691000 |
| 1 | 2.423570000  | 0.929765000  | -1.684058000 |
| 1 | 3.797533000  | 1.003344000  | -0.562050000 |
| 1 | 0.053573000  | 4.647746000  | 0.205124000  |
| 6 | -0.763139000 | 5.389863000  | 0.095850000  |
| 6 | -0.194845000 | 6.772940000  | 0.145988000  |
| 6 | -0.483545000 | 7.765448000  | -0.850478000 |
| 6 | 0.026752000  | 9.040421000  | -0.732109000 |
| 6 | 0.854239000  | 9.382878000  | 0.390565000  |
| 6 | 1.159599000  | 8.412559000  | 1.388838000  |
| 6 | 0.650057000  | 7.139667000  | 1.270537000  |
| 6 | -1.636439000 | 5.022878000  | -1.109131000 |
| 1 | -1.113659000 | 7.509235000  | -1.692235000 |
| 1 | -0.192521000 | 9.796647000  | -1.477424000 |
| 1 | 1.247645000  | 10.391023000 | 0.477229000  |
| 1 | 1.783566000  | 8.688616000  | 2.230689000  |
| 1 | 0.862459000  | 6.389522000  | 2.025083000  |
| 1 | -1.339804000 | 5.255413000  | 1.032535000  |
| 1 | -2.541523000 | 5.636592000  | -1.166853000 |
| 1 | -1.948897000 | 3.978755000  | -1.018652000 |
| 1 | -1.090192000 | 5.125195000  | -2.053390000 |

<sup>4</sup>RC<sub>2</sub>:

|    |              |              |              |
|----|--------------|--------------|--------------|
| 26 | 0.000000000  | 0.000000000  | 0.000000000  |
| 7  | 0.000000000  | 0.000000000  | 2.052707000  |
| 7  | 2.226227000  | 0.000000000  | 0.367925000  |
| 7  | 0.074625000  | -0.178889000 | -2.000352000 |
| 6  | -1.104574000 | 0.001508000  | 2.813010000  |
| 6  | -1.050690000 | 0.135034000  | 4.214571000  |
| 6  | 0.178557000  | 0.286535000  | 4.832729000  |
| 6  | 1.367794000  | 0.308813000  | 4.054564000  |
| 6  | 2.663050000  | 0.468113000  | 4.619496000  |
| 6  | 3.779741000  | 0.482520000  | 3.806834000  |
| 6  | 3.648733000  | 0.335640000  | 2.402755000  |
| 6  | 2.402827000  | 0.177655000  | 1.818219000  |
| 6  | 1.243789000  | 0.161111000  | 2.634822000  |
| 1  | -2.049853000 | -0.105278000 | 2.297875000  |
| 1  | -1.969888000 | 0.115846000  | 4.786424000  |
| 1  | 0.246778000  | 0.391025000  | 5.910540000  |
| 1  | 2.760773000  | 0.574080000  | 5.694289000  |
| 1  | 4.767463000  | 0.600917000  | 4.236370000  |
| 1  | 4.545646000  | 0.346157000  | 1.792746000  |
| 6  | -0.004729000 | 0.852549000  | -2.857409000 |
| 6  | -0.047342000 | 0.658620000  | -4.250626000 |
| 6  | -0.018042000 | -0.631153000 | -4.760847000 |
| 6  | 0.063862000  | -1.744659000 | -3.881062000 |
| 6  | 0.095447000  | -3.098271000 | -4.316836000 |

|   |              |              |              |
|---|--------------|--------------|--------------|
| 6 | 0.182153000  | -4.122805000 | -3.392622000 |
| 6 | 0.247603000  | -3.842730000 | -2.003013000 |
| 6 | 0.214430000  | -2.534228000 | -1.549122000 |
| 6 | 0.117540000  | -1.477244000 | -2.477028000 |
| 1 | -0.041048000 | 1.838669000  | -2.411665000 |
| 1 | -0.105140000 | 1.517996000  | -4.906653000 |
| 1 | -0.056059000 | -0.800737000 | -5.831777000 |
| 1 | 0.051920000  | -3.315103000 | -5.378560000 |
| 1 | 0.205754000  | -5.154599000 | -3.722737000 |
| 1 | 0.323402000  | -4.672913000 | -1.309317000 |
| 7 | 0.299338000  | -2.161180000 | -0.115684000 |
| 6 | 1.702217000  | -2.419825000 | 0.422382000  |
| 6 | 2.672586000  | -1.370807000 | -0.087843000 |
| 1 | 1.638999000  | -2.396187000 | 1.513032000  |
| 1 | 2.027561000  | -3.423833000 | 0.127896000  |
| 1 | 3.686493000  | -1.582677000 | 0.273391000  |
| 1 | 2.705264000  | -1.360380000 | -1.180775000 |
| 6 | -0.698157000 | -2.943666000 | 0.706626000  |
| 1 | -1.689286000 | -2.819726000 | 0.273005000  |
| 1 | -0.693357000 | -2.560087000 | 1.726100000  |
| 1 | -0.432256000 | -4.004968000 | 0.729872000  |
| 8 | -0.128338000 | 1.657709000  | -0.056115000 |
| 7 | -2.300598000 | -0.332521000 | -0.195076000 |
| 6 | -3.427882000 | -0.329733000 | -0.506111000 |
| 6 | -4.835796000 | -0.338685000 | -0.877205000 |
| 1 | -5.186500000 | 0.678435000  | -1.080854000 |
| 1 | -5.442451000 | -0.758961000 | -0.067437000 |
| 1 | -4.993391000 | -0.946704000 | -1.774564000 |
| 6 | 2.897188000  | 1.086386000  | -0.425223000 |
| 1 | 2.537823000  | 2.052234000  | -0.072170000 |
| 1 | 2.637271000  | 0.964972000  | -1.477552000 |
| 1 | 3.986594000  | 1.037212000  | -0.324335000 |
| 1 | -0.695367000 | 4.550794000  | 0.499351000  |
| 6 | -1.577395000 | 5.150948000  | 0.238052000  |
| 6 | -1.480493000 | 6.554407000  | 0.727589000  |
| 6 | -2.682611000 | 7.294868000  | 1.037561000  |
| 6 | -2.614293000 | 8.612437000  | 1.429404000  |
| 6 | -1.339457000 | 9.255285000  | 1.524281000  |
| 6 | -0.135452000 | 8.540094000  | 1.224256000  |
| 6 | -0.204623000 | 7.222420000  | 0.831742000  |
| 6 | -1.719934000 | 5.138482000  | -1.330409000 |
| 1 | -3.640732000 | 6.792960000  | 0.957255000  |
| 1 | -3.512424000 | 9.171865000  | 1.664497000  |
| 1 | -1.284575000 | 10.297507000 | 1.822991000  |
| 1 | 0.818208000  | 9.048420000  | 1.306671000  |
| 1 | 0.697500000  | 6.668612000  | 0.596315000  |
| 1 | -2.461743000 | 4.662218000  | 0.661960000  |
| 1 | -0.859616000 | 5.613172000  | -1.810118000 |
| 1 | -2.629000000 | 5.652471000  | -1.653647000 |
| 1 | -1.772252000 | 4.094111000  | -1.651533000 |

<sup>2</sup>TS<sub>HA</sub>:

|    |              |              |              |
|----|--------------|--------------|--------------|
| 26 | 0.000000000  | 0.000000000  | 0.000000000  |
| 7  | 0.000000000  | 0.000000000  | 1.978362000  |
| 7  | 2.058824000  | 0.000000000  | 0.185594000  |
| 7  | 0.030222000  | -0.174524000 | -1.990210000 |
| 6  | -1.064548000 | -0.034450000 | 2.795931000  |
| 6  | -0.937674000 | 0.070613000  | 4.195905000  |
| 6  | 0.318860000  | 0.228518000  | 4.759162000  |
| 6  | 1.467263000  | 0.282605000  | 3.922942000  |
| 6  | 2.793978000  | 0.456427000  | 4.406352000  |
| 6  | 3.855947000  | 0.502122000  | 3.521974000  |
| 6  | 3.644100000  | 0.367182000  | 2.124725000  |
| 6  | 2.362554000  | 0.196286000  | 1.628824000  |
| 6  | 1.265506000  | 0.157060000  | 2.512634000  |
| 1  | -2.034301000 | -0.149278000 | 2.332708000  |
| 1  | -1.826139000 | 0.024967000  | 4.813285000  |
| 1  | 0.435748000  | 0.311967000  | 5.834411000  |
| 1  | 2.961878000  | 0.551165000  | 5.473437000  |

|   |              |              |              |
|---|--------------|--------------|--------------|
| 1 | 4.866628000  | 0.634809000  | 3.889589000  |
| 1 | 4.504577000  | 0.396347000  | 1.465528000  |
| 6 | -0.033143000 | 0.858634000  | -2.843543000 |
| 6 | -0.124917000 | 0.671183000  | -4.237818000 |
| 6 | -0.167212000 | -0.613450000 | -4.713327000 |
| 6 | -0.118182000 | -1.730361000 | -3.874735000 |
| 6 | -0.165406000 | -3.083088000 | -4.311579000 |
| 6 | -0.112743000 | -4.113901000 | -3.392071000 |
| 6 | -0.002817000 | -3.841950000 | -2.003579000 |
| 6 | 0.045249000  | -2.534408000 | -1.549582000 |
| 6 | -0.015336000 | -1.468677000 | -2.472018000 |
| 1 | -0.016758000 | 1.845021000  | -2.399351000 |
| 1 | -0.162977000 | 1.537085000  | -4.886857000 |
| 1 | -0.239102000 | -0.778245000 | -5.823111000 |
| 1 | -0.241233000 | -3.294590000 | -5.372387000 |
| 1 | -0.147543000 | -5.144368000 | -3.725251000 |
| 1 | 0.048717000  | -4.677875000 | -1.314621000 |
| 7 | 0.212549000  | -2.165479000 | -0.122232000 |
| 6 | 1.644044000  | -2.433885000 | 0.321059000  |
| 6 | 2.544055000  | -1.374077000 | -0.270131000 |
| 1 | 1.663170000  | -2.410522000 | 1.413459000  |
| 1 | 1.952584000  | -3.434928000 | 0.000721000  |
| 1 | 3.583657000  | -1.513469000 | 0.043926000  |
| 1 | 2.515987000  | -1.385146000 | -1.361612000 |
| 6 | -0.732281000 | -2.944477000 | 0.760562000  |
| 1 | -1.748407000 | -2.838287000 | 0.386091000  |
| 1 | -0.667363000 | -2.562250000 | 1.778179000  |
| 1 | -0.465008000 | -4.005499000 | 0.770343000  |
| 8 | -0.042016000 | 1.685562000  | -0.135093000 |
| 7 | -2.016681000 | -0.225756000 | -0.174618000 |
| 6 | -3.145257000 | -0.323081000 | -0.457339000 |
| 6 | -4.552384000 | -0.456663000 | -0.803289000 |
| 1 | -5.117764000 | 0.419884000  | -0.468870000 |
| 1 | -4.983096000 | -1.346025000 | -3.329457000 |
| 1 | -4.671113000 | -0.551595000 | -1.888376000 |
| 6 | 2.723851000  | 1.065321000  | -0.656884000 |
| 1 | 2.408382000  | 2.043727000  | -0.303774000 |
| 1 | 2.424743000  | 0.931546000  | -1.694289000 |
| 1 | 3.811120000  | 0.973136000  | -0.586925000 |
| 1 | -0.337714000 | 2.841247000  | 0.654854000  |
| 6 | -0.378589000 | 3.848427000  | 1.397188000  |
| 6 | -1.097693000 | 4.873510000  | 0.655660000  |
| 6 | -0.425347000 | 5.803806000  | -0.214396000 |
| 6 | -1.122811000 | 6.833253000  | -0.815046000 |
| 6 | -2.521886000 | 6.963538000  | -0.601280000 |
| 6 | -3.215673000 | 6.038723000  | 0.223427000  |
| 6 | -2.524689000 | 5.005319000  | 0.823636000  |
| 6 | 1.086764000  | 4.077588000  | 1.773658000  |
| 1 | 0.642043000  | 5.713835000  | -0.373544000 |
| 1 | -0.609629000 | 7.550374000  | -1.445355000 |
| 1 | -3.064514000 | 7.774619000  | -1.075801000 |
| 1 | -4.280160000 | 6.160403000  | 0.386569000  |
| 1 | -3.040863000 | 4.306648000  | 1.474013000  |
| 1 | -0.972449000 | 3.455426000  | 2.231606000  |
| 1 | 1.166625000  | 4.911267000  | 2.482741000  |
| 1 | 1.716709000  | 4.316330000  | 0.911426000  |
| 1 | 1.499786000  | 3.190107000  | 2.259009000  |

<sup>4</sup>TS<sub>HA</sub>:

|    |              |              |              |
|----|--------------|--------------|--------------|
| 26 | 0.000000000  | 0.000000000  | 0.000000000  |
| 7  | 0.000000000  | 0.000000000  | 1.982555000  |
| 7  | 2.067282000  | 0.000000000  | 0.199508000  |
| 7  | 0.043731000  | -0.244611000 | -1.984012000 |
| 6  | -1.070398000 | -0.025987000 | 2.791564000  |
| 6  | -0.954095000 | 0.118480000  | 4.188626000  |
| 6  | 0.296636000  | 0.307070000  | 4.755731000  |
| 6  | 1.450118000  | 0.351430000  | 3.926299000  |
| 6  | 2.772142000  | 0.546987000  | 4.414120000  |
| 6  | 3.840191000  | 0.575547000  | 3.536497000  |

|    |              |              |              |   |              |              |              |
|----|--------------|--------------|--------------|---|--------------|--------------|--------------|
| 6  | 3.638610000  | 0.408367000  | 2.141379000  | 7 | 0.037565000  | -0.123545000 | -1.987816000 |
| 6  | 2.361011000  | 0.218183000  | 1.642120000  | 6 | -1.052914000 | -0.043727000 | 2.815283000  |
| 6  | 1.259463000  | 0.188291000  | 2.518530000  | 6 | -0.916242000 | 0.079389000  | 4.212215000  |
| 1  | -2.035836000 | -0.159213000 | 2.325240000  | 6 | 0.343256000  | 0.259316000  | 4.760245000  |
| 1  | -1.846682000 | 0.800576000  | 4.800524000  | 6 | 1.482343000  | 0.314213000  | 3.911871000  |
| 1  | 0.405110000  | 0.422575000  | 5.829169000  | 6 | 2.811157000  | 0.491025000  | 4.387184000  |
| 1  | 2.931533000  | 0.671309000  | 5.479699000  | 6 | 3.867731000  | 0.521624000  | 3.497053000  |
| 1  | 4.847673000  | 0.722523000  | 3.907405000  | 6 | 3.646052000  | 0.372950000  | 2.102919000  |
| 1  | 4.503121000  | 0.430967000  | 1.487144000  | 6 | 2.362954000  | 0.205295000  | 1.610786000  |
| 6  | -0.001483000 | 0.767225000  | -2.864151000 | 6 | 1.270028000  | 0.175891000  | 2.503668000  |
| 6  | -0.084155000 | 0.547294000  | -4.253556000 | 1 | -2.026181000 | -0.180311000 | 2.366179000  |
| 6  | -0.140946000 | -0.749517000 | -4.736831000 | 1 | -1.798649000 | 0.029492000  | 4.837879000  |
| 6  | -0.108334000 | -1.844387000 | -3.830803000 | 1 | 0.470934000  | 0.355656000  | 5.833387000  |
| 6  | -0.171151000 | -3.205737000 | -4.238710000 | 1 | 2.983521000  | 0.594331000  | 5.452964000  |
| 6  | -0.129440000 | -4.216789000 | -3.297395000 | 1 | 4.881362000  | 0.650957000  | 3.857608000  |
| 6  | -0.010877000 | -3.915312000 | -1.915866000 | 1 | 4.502871000  | 0.387894000  | 1.438550000  |
| 6  | 0.051048000  | -2.599121000 | -1.488140000 | 6 | 0.005385000  | 0.924123000  | -2.821065000 |
| 6  | -0.006311000 | -1.551736000 | -2.433145000 | 6 | -0.082447000 | 0.761930000  | -4.219966000 |
| 1  | 0.021113000  | 1.764638000  | -2.447859000 | 6 | -0.152857000 | -0.512171000 | -4.757826000 |
| 1  | -0.105841000 | 1.397057000  | -4.924323000 | 6 | -0.132416000 | -1.645116000 | -3.898154000 |
| 1  | -0.210973000 | -0.940542000 | -5.802579000 | 6 | -0.208324000 | -2.990457000 | -4.353208000 |
| 1  | -0.250025000 | -3.438514000 | -5.295037000 | 6 | -0.179823000 | -4.033269000 | -3.446068000 |
| 1  | -0.177432000 | -5.253914000 | -3.607610000 | 6 | -0.066922000 | -3.783143000 | -2.052983000 |
| 1  | 0.037448000  | -4.736590000 | -1.209362000 | 6 | 0.006038000  | -2.483373000 | -1.581799000 |
| 7  | 0.231632000  | -2.208379000 | -0.070171000 | 6 | -0.029443000 | -1.406285000 | -2.492535000 |
| 6  | 1.668990000  | -2.442822000 | 0.367802000  | 1 | 0.050504000  | 1.895227000  | -2.347178000 |
| 6  | 2.555734000  | -1.378894000 | -0.238700000 | 1 | -0.093332000 | 1.637726000  | -4.856719000 |
| 1  | 1.692276000  | -2.403753000 | 1.459695000  | 1 | -0.223645000 | -0.657201000 | -5.830537000 |
| 1  | 1.995376000  | -3.442767000 | 0.060452000  | 1 | -0.287306000 | -3.187049000 | -5.416880000 |
| 1  | 3.596585000  | -1.506731000 | 0.077143000  | 1 | -0.237652000 | -5.058294000 | -3.792601000 |
| 1  | 2.527930000  | -1.403860000 | -1.329969000 | 1 | -0.036573000 | -4.629309000 | -1.375562000 |
| 6  | -0.698823000 | -2.973138000 | 0.837361000  | 7 | 0.165980000  | -2.130975000 | -0.148015000 |
| 1  | -1.719427000 | -2.878723000 | 0.471242000  | 6 | 1.590427000  | -2.425028000 | 0.306907000  |
| 1  | -0.625443000 | -2.569429000 | 1.846079000  | 6 | 2.523648000  | -1.381179000 | -0.270574000 |
| 1  | -0.427257000 | -4.032989000 | 0.867988000  | 1 | 1.596560000  | -2.402321000 | 1.399589000  |
| 8  | -0.095118000 | 1.695072000  | -0.071908000 | 1 | 1.882418000  | -3.431686000 | -0.011273000 |
| 7  | -2.027374000 | -0.257074000 | -0.178665000 | 1 | 3.554648000  | -1.551755000 | 0.057046000  |
| 6  | -3.167424000 | -0.349413000 | -0.412631000 | 1 | 2.510433000  | -1.396504000 | -1.362440000 |
| 6  | -4.589402000 | -0.472583000 | -0.697426000 | 6 | -0.802599000 | -2.902984000 | 0.712128000  |
| 1  | -5.158300000 | 0.287749000  | -0.151146000 | 1 | -1.812491000 | -2.766708000 | 0.329178000  |
| 1  | -4.957816000 | -1.460388000 | -0.397792000 | 1 | -0.739400000 | -2.537252000 | 1.735781000  |
| 1  | -4.777198000 | -0.344937000 | -1.769204000 | 1 | -0.561304000 | -3.970193000 | 0.708229000  |
| 6  | 2.731527000  | 1.057775000  | -0.649344000 | 8 | 0.004410000  | 1.845410000  | -0.067997000 |
| 1  | 2.419537000  | 2.037805000  | -0.297707000 | 7 | -2.011720000 | -0.085222000 | -0.114714000 |
| 1  | 2.433434000  | 0.918624000  | -1.686576000 | 6 | -3.160701000 | -0.129754000 | -0.315886000 |
| 1  | 3.818934000  | 0.965819000  | -0.579508000 | 6 | -4.592804000 | -0.192359000 | -0.571675000 |
| 1  | -0.269370000 | 3.000492000  | -0.002271000 | 1 | -5.054026000 | 0.790466000  | -0.426225000 |
| 6  | -0.087544000 | 4.308689000  | 0.073936000  | 1 | -5.076528000 | -0.904163000 | 0.106207000  |
| 6  | -1.361313000 | 4.896254000  | 0.420964000  | 1 | -4.781791000 | -0.514090000 | -1.601841000 |
| 6  | -2.293274000 | 5.368363000  | -0.567345000 | 6 | 2.716773000  | 1.061684000  | -0.674641000 |
| 6  | -3.461726000 | 6.000843000  | -0.184867000 | 1 | 2.314044000  | 2.027515000  | -0.380358000 |
| 6  | -3.758272000 | 6.176329000  | 1.191023000  | 1 | 2.483375000  | 0.871027000  | -1.720496000 |
| 6  | -2.871200000 | 5.696322000  | 2.185376000  | 1 | 3.802311000  | 1.038614000  | -0.545994000 |
| 6  | -1.706898000 | 5.052689000  | 1.811608000  | 1 | -0.752439000 | 2.292848000  | 0.367077000  |
| 6  | 0.592808000  | 4.635902000  | -1.249951000 | 6 | -0.160234000 | 5.221148000  | 0.094404000  |
| 1  | -2.064331000 | 5.255333000  | -1.620026000 | 6 | -0.777231000 | 6.431953000  | -0.210921000 |
| 1  | -4.149361000 | 6.379603000  | -0.932242000 | 6 | -1.485822000 | 6.555739000  | -1.463702000 |
| 1  | -4.671157000 | 6.684632000  | 1.483441000  | 6 | -2.064831000 | 7.755646000  | -1.830502000 |
| 1  | -3.102893000 | 5.852764000  | 3.232511000  | 6 | -1.963805000 | 8.868520000  | -0.966109000 |
| 1  | -1.008359000 | 4.703557000  | 2.565337000  | 6 | -1.283956000 | 8.780454000  | 0.270899000  |
| 1  | 0.608743000  | 4.284433000  | 0.921295000  | 6 | -0.701500000 | 7.586695000  | 0.652250000  |
| 1  | 0.940703000  | 5.678076000  | -1.238489000 | 6 | 0.686406000  | 4.914500000  | 1.267405000  |
| 1  | -0.066498000 | 4.522125000  | -2.115723000 | 1 | -1.545814000 | 5.694545000  | -2.121806000 |
| 1  | 1.474102000  | 4.007199000  | -1.403425000 | 1 | -2.589106000 | 7.852448000  | -2.773560000 |
|    |              |              |              | 1 | -2.417309000 | 9.811116000  | -1.256611000 |
|    |              |              |              | 1 | -1.223393000 | 9.650855000  | 0.913321000  |
|    |              |              |              | 1 | -0.181894000 | 7.522977000  | 1.600479000  |
|    |              |              |              | 1 | -0.257670000 | 4.415512000  | -0.634555000 |
|    |              |              |              | 1 | 0.526989000  | 5.567005000  | 2.126678000  |
| Σ: |              |              |              |   |              |              |              |
| 26 | 0.000000000  | 0.000000000  | 0.000000000  |   |              |              |              |
| 7  | 0.000000000  | 0.000000000  | 1.983149000  |   |              |              |              |
| 7  | 2.058529000  | 0.000000000  | 0.170417000  |   |              |              |              |

|                       |              |              |              |                       |              |              |              |
|-----------------------|--------------|--------------|--------------|-----------------------|--------------|--------------|--------------|
| 1                     | 1.744464000  | 5.022968000  | 0.965579000  | 1                     | -2.672205000 | 7.239123000  | 0.503119000  |
| 1                     | 0.579967000  | 3.865062000  | 1.558105933  | 1                     | -2.158550000 | 9.649139000  | 0.419855000  |
| <b><sup>4</sup>I:</b> |              |              |              | 1                     | 0.193516000  | 10.417710000 | 0.229929000  |
| 26                    | 0.000000000  | 0.000000000  | 0.000000000  | 1                     | 2.069877000  | 8.793536000  | 0.124570000  |
| 7                     | 0.000000000  | 0.000000000  | 2.025129000  | 1                     | 1.595150000  | 6.357191000  | 0.211441000  |
| 7                     | 2.243332000  | 0.000000000  | 0.368398000  | 1                     | 0.083889000  | 4.583367000  | 0.372760000  |
| 7                     | 0.067815000  | -0.030064000 | -1.974286000 | 1                     | -2.965186000 | 5.149521000  | 0.371292000  |
| 6                     | -1.109401000 | -0.039909000 | 2.782605000  | 1                     | -2.187028000 | 4.139783000  | 1.595530000  |
| 6                     | -1.064673000 | 0.035510000  | 4.188834000  | 1                     | -2.109431000 | 3.645314000  | -0.088536000 |
| 6                     | 0.160018000  | 0.162911000  | 4.821974000  | <b><sup>2</sup>P:</b> |              |              |              |
| 6                     | 1.355245000  | 0.209809000  | 4.054116000  | 26                    | 0.000000000  | 0.000000000  | 0.000000000  |
| 6                     | 2.647062000  | 0.334056000  | 4.636318000  | 7                     | 0.000000000  | 0.000000000  | 1.977165000  |
| 6                     | 3.771824000  | 0.359246000  | 3.834839000  | 7                     | 2.053914000  | 0.000000000  | 0.208792000  |
| 6                     | 3.652860000  | 0.255238000  | 2.425615000  | 7                     | 0.042388000  | -0.070805000 | -2.003571000 |
| 6                     | 2.410651000  | 0.137270000  | 1.823304000  | 6                     | -1.072807000 | -0.038294000 | 2.788546000  |
| 6                     | 1.242994000  | 0.118634000  | 2.627920000  | 6                     | -0.960035000 | 0.072122000  | 4.188245000  |
| 1                     | -2.051021000 | -0.135812000 | 2.258195000  | 6                     | 0.290608000  | 0.244040000  | 4.763567000  |
| 1                     | -1.987591000 | -0.010613000 | 4.753312000  | 6                     | 1.446225000  | 0.301098000  | 3.937571000  |
| 1                     | 0.220062000  | 0.223716000  | 5.903651000  | 6                     | 2.768561000  | 0.482932000  | 4.430863000  |
| 1                     | 2.735757000  | 0.401887000  | 5.715156000  | 6                     | 3.838423000  | 0.522094000  | 3.554793000  |
| 1                     | 4.756750000  | 0.449490000  | 4.277583000  | 6                     | 3.639685000  | 0.376644000  | 2.155980000  |
| 1                     | 4.556047000  | 0.264062000  | 1.824630000  | 6                     | 2.361196000  | 0.203729000  | 1.650740000  |
| 6                     | -0.036972000 | 1.054854000  | -2.755501000 | 6                     | 1.258659000  | 0.166148000  | 2.525801000  |
| 6                     | -0.074192000 | 0.950653000  | -4.160194000 | 1                     | -2.039653000 | -0.157805000 | 2.320888000  |
| 6                     | -0.011151000 | -0.300632000 | -4.755487000 | 1                     | -1.854666000 | 0.026141000  | 4.796854000  |
| 6                     | 0.095214000  | -1.469542000 | -3.951868000 | 1                     | 0.395235000  | 0.336757000  | 5.839789000  |
| 6                     | 0.159075000  | -2.791551000 | -4.472759000 | 1                     | 2.926982000  | 0.588798000  | 5.498829000  |
| 6                     | 0.263331000  | -3.871516000 | -3.615308000 | 1                     | 4.845611000  | 0.659217000  | 3.930750000  |
| 6                     | 0.313379000  | -3.681405000 | -2.209700000 | 1                     | 4.506711000  | 0.400754000  | 1.504915000  |
| 6                     | 0.250989000  | -2.405180000 | -1.675185000 | 6                     | 0.065325000  | 0.966496000  | -2.859866000 |
| 6                     | 0.138236000  | -1.293292000 | -2.534442000 | 6                     | -0.024355000 | 0.790665000  | -4.255168000 |
| 1                     | -0.103381000 | 1.999942000  | -2.231220000 | 6                     | -0.145879000 | -0.487519000 | -4.777362000 |
| 1                     | -0.155917000 | 1.849169000  | -4.758676000 | 6                     | -0.162856000 | -1.608697000 | -3.903343000 |
| 1                     | -0.043585000 | -0.399105000 | -5.835673000 | 6                     | -0.267586000 | -2.956549000 | -4.347699000 |
| 1                     | 0.125361000  | -2.941672000 | -5.546327000 | 6                     | -0.256084000 | -3.993779000 | -3.433561000 |
| 1                     | 0.311064000  | -4.878971000 | -4.011313000 | 6                     | -0.130611000 | -3.734812000 | -2.043257000 |
| 1                     | 0.399401000  | -4.553144000 | -1.570123000 | 6                     | -0.033613000 | -2.431548000 | -1.584203000 |
| 7                     | 0.312956000  | -2.117974000 | -0.218722000 | 6                     | -0.057134000 | -1.358190000 | -2.498318000 |
| 6                     | 1.705394000  | -2.412143000 | 0.328276000  | 1                     | 0.174031000  | 1.957075000  | -2.437194000 |
| 6                     | 2.693951000  | -1.353720000 | -0.125647000 | 1                     | 0.004379000  | 1.660354000  | -4.900130000 |
| 1                     | 1.625727000  | -2.432393000 | 1.418111000  | 1                     | -0.221574000 | -0.642265000 | -5.848892000 |
| 1                     | 2.023120000  | -3.406978000 | -0.002601000 | 1                     | -0.350649000 | -3.159604000 | -5.410063000 |
| 1                     | 3.699000000  | -1.588324000 | 0.245959000  | 1                     | -0.333450000 | -5.020623000 | -3.771764000 |
| 1                     | 2.746730000  | -1.305955000 | -1.216816000 | 1                     | -0.108949000 | -4.577687000 | -1.361261000 |
| 6                     | -0.695268000 | -2.947806000 | 0.542780000  | 7                     | 0.144076000  | -2.079457000 | -0.146380000 |
| 1                     | -1.678053000 | -2.818481000 | 0.095868000  | 6                     | 1.555852000  | -2.419646000 | 0.323033000  |
| 1                     | -0.713308000 | -2.616979000 | 1.580917000  | 6                     | 2.509594000  | -1.390778000 | -0.235901000 |
| 1                     | -0.420057000 | -4.006564000 | 0.515702000  | 1                     | 1.550045000  | -2.412206000 | 1.415474000  |
| 8                     | -0.211088000 | 1.836355000  | -0.040154000 | 1                     | 1.819442000  | -3.429144000 | -0.008787000 |
| 7                     | -2.354965000 | -0.357065000 | -0.203121000 | 1                     | 3.533201000  | -1.566733000 | 0.109747000  |
| 6                     | -3.481697000 | -0.419725000 | -0.512775000 | 1                     | 2.514724000  | -1.400656000 | -1.328218000 |
| 6                     | -4.886670000 | -0.514366000 | -0.884381000 | 6                     | -0.853441000 | -2.828529000 | 0.713797000  |
| 1                     | -5.440416000 | 0.360867000  | -0.528445000 | 1                     | -1.857425000 | -2.669779000 | 0.327408000  |
| 1                     | -5.339855000 | -1.409999000 | -0.445241000 | 1                     | -0.780191000 | -2.477736000 | 1.740837000  |
| 1                     | -4.993688000 | -0.572404000 | -1.972740000 | 1                     | -0.629101000 | -3.898488000 | 0.695624000  |
| 6                     | 2.907706000  | 1.112033000  | -0.391739000 | 8                     | -0.186605000 | 1.964845000  | -0.002199000 |
| 1                     | 2.515582000  | 2.063222000  | -0.034959000 | 7                     | -2.022489000 | -0.076407000 | -0.212507000 |
| 1                     | 2.670738000  | 1.003814000  | -1.450781000 | 6                     | -3.174569000 | -0.089499000 | -0.405986000 |
| 1                     | 3.995799000  | 1.087359000  | -0.267958000 | 6                     | -4.609664000 | -0.112425000 | -0.644379000 |
| 1                     | -0.377159000 | 2.280898000  | 0.818212000  | 1                     | -5.114750000 | 0.645685000  | -0.034677000 |
| 6                     | -0.796302000 | 5.225792000  | 0.428446000  | 1                     | -5.025548000 | -1.094184000 | -0.388498000 |
| 6                     | -0.574211000 | 6.597922000  | 0.367404000  | 1                     | -4.827187000 | 0.089121000  | -1.699886000 |
| 6                     | -1.643265000 | 7.567562000  | 0.422973000  | 6                     | 2.748605000  | 1.034494000  | -0.650596000 |
| 6                     | -1.359613000 | 8.918614000  | 0.376510000  | 1                     | 2.444952000  | 2.032927000  | -0.349832000 |
| 6                     | -0.017727000 | 9.353561000  | 0.268448000  | 1                     | 2.481269000  | 0.867910000  | -1.691801000 |
| 6                     | 1.051849000  | 8.432613000  | 0.207704000  | 1                     | 3.832788000  | 0.935892000  | -0.550239000 |
| 6                     | 0.784701000  | 7.077824000  | 0.255547000  | 1                     | -0.917801000 | 2.248953000  | -0.588389000 |
| 6                     | -2.092851000 | 4.525997000  | 0.565194000  | 6                     | 0.209625000  | 3.272892000  | 0.867149000  |

|   |              |             |              |   |              |              |              |
|---|--------------|-------------|--------------|---|--------------|--------------|--------------|
| 6 | 0.565983000  | 4.351314000 | -0.108868000 | 1 | -4.976497000 | -1.334517000 | -1.571766000 |
| 6 | -0.425773000 | 4.989086000 | -0.886862000 | 6 | 2.942161000  | 1.074029000  | -0.407462000 |
| 6 | -0.077271000 | 6.016362000 | -1.768583000 | 1 | 2.615984000  | 2.049384000  | -0.049745000 |
| 6 | 1.259109000  | 6.429830000 | -1.873134000 | 1 | 2.697589000  | 0.968090000  | -1.464662000 |
| 6 | 2.249314000  | 5.811011000 | -1.097796000 | 1 | 4.027723000  | 0.991357000  | -0.293363000 |
| 6 | 1.906687000  | 4.770715000 | -0.228860000 | 1 | -0.136472000 | 2.209172000  | 1.191934000  |
| 6 | -0.947315000 | 3.557066000 | 1.808714000  | 6 | -0.755621000 | 3.384891000  | -0.426267000 |
| 1 | -1.475763000 | 4.722861000 | -0.779568000 | 6 | -1.596473000 | 4.054226000  | 0.614148000  |
| 1 | -0.844167000 | 6.514156000 | -2.351214000 | 6 | -2.986516000 | 3.795743000  | 0.651169000  |
| 1 | 1.523112000  | 7.241627000 | -2.540265000 | 6 | -3.804911000 | 4.441893000  | 1.575721000  |
| 1 | 3.277017000  | 6.148334000 | -1.160662000 | 6 | -3.245301000 | 5.356398000  | 2.486280000  |
| 1 | 2.674446000  | 4.318220000 | 0.394306000  | 6 | -1.865074000 | 5.615256000  | 2.468247000  |
| 1 | 1.087573000  | 2.906042000 | 1.395295000  | 6 | -1.043381000 | 4.968357000  | 1.544040000  |
| 1 | -0.685432000 | 4.427085000 | 2.421950000  | 6 | 0.446420000  | 4.157337000  | -0.940601000 |
| 1 | -1.147351000 | 2.717363000 | 2.477273000  | 1 | -3.423298000 | 3.116250000  | -0.074814000 |
| 1 | -1.865557000 | 3.817231000 | 1.274363000  | 1 | -4.874375000 | 4.261989000  | 1.580814000  |

**4P:**

|    |              |              |              |   |              |             |              |
|----|--------------|--------------|--------------|---|--------------|-------------|--------------|
| 26 | 0.000000000  | 0.000000000  | 0.000000000  | 1 | -1.439783000 | 6.335532000 | 3.157390000  |
| 7  | 0.000000000  | 0.000000000  | 2.030177000  | 1 | 0.014104000  | 5.210680000 | 1.524316000  |
| 7  | 2.229557000  | 0.000000000  | 0.369510000  | 1 | -1.376843000 | 2.986488000 | -1.230557000 |
| 7  | 0.142369000  | -0.101738000 | -1.980727000 | 1 | 1.136987000  | 4.430065000 | -0.139549000 |
| 6  | -1.112864000 | -0.047790000 | 2.787168000  | 1 | 0.098928000  | 5.086713000 | -1.404948000 |
| 6  | -1.066389000 | 0.032895000  | 4.191249000  | 1 | 1.010122000  | 3.601060000 | -1.693219000 |
| 6  | 0.158810000  | 0.176064000  | 4.824274000  |   |              |             |              |
| 6  | 1.354013000  | 0.231276000  | 4.057995000  |   |              |             |              |
| 6  | 2.645322000  | 0.380972000  | 4.636450000  |   |              |             |              |
| 6  | 3.768466000  | 0.419641000  | 3.832455000  |   |              |             |              |
| 6  | 3.650848000  | 0.301420000  | 2.423788000  |   |              |             |              |
| 6  | 2.408107000  | 0.157975000  | 1.826732000  |   |              |             |              |
| 6  | 1.244647000  | 0.128729000  | 2.631837000  |   |              |             |              |
| 1  | -2.055714000 | -0.142140000 | 2.264926000  |   |              |             |              |
| 1  | -1.989349000 | -0.012603000 | 4.755757000  |   |              |             |              |
| 1  | 0.215958000  | 0.247254000  | 5.905619000  |   |              |             |              |
| 1  | 2.735085000  | 0.462400000  | 5.714283000  |   |              |             |              |
| 1  | 4.752044000  | 0.534325000  | 4.272460000  |   |              |             |              |
| 1  | 4.554565000  | 0.323192000  | 1.824210000  |   |              |             |              |
| 6  | 0.137386000  | 0.939704000  | -2.834195000 |   |              |             |              |
| 6  | 0.109187000  | 0.771546000  | -4.229427000 |   |              |             |              |
| 6  | 0.082818000  | -0.510047000 | -4.760935000 |   |              |             |              |
| 6  | 0.097126000  | -1.636367000 | -3.895849000 |   |              |             |              |
| 6  | 0.078743000  | -2.981550000 | -4.358800000 |   |              |             |              |
| 6  | 0.107370000  | -4.028635000 | -3.456650000 |   |              |             |              |
| 6  | 0.160869000  | -3.779009000 | -2.061440000 |   |              |             |              |
| 6  | 0.174099000  | -2.477904000 | -1.583563000 |   |              |             |              |
| 6  | 0.135344000  | -1.396233000 | -2.484546000 |   |              |             |              |
| 1  | 0.161514000  | 1.926092000  | -2.400229000 |   |              |             |              |
| 1  | 0.107497000  | 1.644884000  | -4.869753000 |   |              |             |              |
| 1  | 0.055899000  | -0.660909000 | -5.835422000 |   |              |             |              |
| 1  | 0.044125000  | -3.173347000 | -5.425765000 |   |              |             |              |
| 1  | 0.096077000  | -5.053568000 | -3.808118000 |   |              |             |              |
| 1  | 0.195114000  | -4.625387000 | -1.384198000 |   |              |             |              |
| 7  | 0.267836000  | -2.142415000 | -0.141208000 |   |              |             |              |
| 6  | 1.669151000  | -2.418731000 | 0.394984000  |   |              |             |              |
| 6  | 2.657097000  | -1.375532000 | -0.096812000 |   |              |             |              |
| 1  | 1.604276000  | -2.416850000 | 1.485444000  |   |              |             |              |
| 1  | 1.980552000  | -3.420439000 | 0.079101000  |   |              |             |              |
| 1  | 3.662430000  | -1.606887000 | 0.274848000  |   |              |             |              |
| 1  | 2.704272000  | -1.354726000 | -1.188703000 |   |              |             |              |
| 6  | -0.740882000 | -2.918576000 | 0.672167000  |   |              |             |              |
| 1  | -1.732206000 | -2.777592000 | 0.247227000  |   |              |             |              |
| 1  | -0.719209000 | -2.563601000 | 1.701363000  |   |              |             |              |
| 1  | -0.493848000 | -3.984587000 | 0.667397000  |   |              |             |              |
| 8  | -0.212694000 | 2.013619000  | 0.234856000  |   |              |             |              |
| 7  | -2.287452000 | -0.245172000 | -0.262993000 |   |              |             |              |
| 6  | -3.414367000 | -0.339112000 | -0.565597000 |   |              |             |              |
| 6  | -4.819142000 | -0.463574000 | -0.924817000 |   |              |             |              |
| 1  | -5.163586000 | 0.429266000  | -1.458215000 |   |              |             |              |
| 1  | -5.434807000 | -0.587098000 | -0.026023000 |   |              |             |              |

**Solvent optimized geometries at UB3LYP/BS2:**

<sup>3</sup>RC<sub>1</sub>:

|    |              |              |              |
|----|--------------|--------------|--------------|
| 26 | 0.000000000  | 0.000000000  | 0.000000000  |
| 7  | 0.000000000  | 0.000000000  | 1.994904000  |
| 7  | 2.052683000  | 0.000000000  | 0.199156000  |
| 7  | 0.009767000  | -0.185165000 | -1.991318000 |
| 6  | -1.046620000 | -0.037150000 | 2.810696000  |
| 6  | -0.932248000 | 0.148085000  | 4.198704000  |
| 6  | 0.305499000  | 0.401503000  | 4.744065000  |
| 6  | 1.444381000  | 0.451200000  | 3.904858000  |
| 6  | 2.757082000  | 0.704879000  | 4.373820000  |
| 6  | 3.811042000  | 0.728397000  | 3.490867000  |
| 6  | 3.606716000  | 0.498871000  | 2.110173000  |
| 6  | 2.340196000  | 0.257942000  | 1.624662000  |
| 6  | 1.246257000  | 0.232640000  | 2.512546000  |
| 1  | -2.014295000 | -0.215601000 | 2.361626000  |
| 1  | -1.825553000 | 0.102074000  | 4.810580000  |
| 1  | 0.418760000  | 0.564693000  | 5.811240000  |
| 1  | 2.916206000  | 0.878898000  | 5.433186000  |
| 1  | 4.817233000  | 0.923672000  | 3.845266000  |
| 1  | 4.466269000  | 0.520406000  | 1.450122000  |
| 6  | -0.070225000 | 0.831905000  | -2.840461000 |
| 6  | -0.179837000 | 0.645362000  | -4.230628000 |
| 6  | -0.224170000 | -0.632698000 | -4.737845000 |
| 6  | -0.151879000 | -1.740956000 | -3.857458000 |
| 6  | -0.194524000 | -3.092108000 | -4.283832000 |
| 6  | -0.123174000 | -4.110962000 | -3.361525000 |
| 6  | -0.007070000 | -3.832763000 | -1.979235000 |
| 6  | 0.047510000  | -2.529582000 | -1.536200000 |
| 6  | -0.028542000 | -1.469935000 | -2.465430000 |
| 1  | -0.050655000 | 1.823034000  | -2.404223000 |
| 1  | -0.230578000 | 1.514363000  | -4.876404000 |
| 1  | -0.315109000 | -0.802686000 | -5.806354000 |
| 1  | -0.284049000 | -3.309504000 | -5.343483000 |
| 1  | -0.158646000 | -5.144813000 | -3.687247000 |
| 1  | 0.051829000  | -4.664204000 | -1.286310000 |
| 7  | 0.197485000  | -2.169282000 | -0.118041000 |
| 6  | 1.603689000  | -2.427897000 | 0.353929000  |
| 6  | 2.534063000  | -1.374000000 | -0.199075000 |
| 1  | 1.592400000  | -2.404280000 | 1.444492000  |
| 1  | 1.933820000  | -3.425630000 | 0.052666000  |
| 1  | 3.554226000  | -1.528789000 | 0.160084000  |
| 1  | 2.563059000  | -1.404178000 | -1.288221000 |
| 6  | -0.754948000 | -2.944627000 | 0.731067000  |
| 1  | -1.765501000 | -2.827004000 | 0.347446000  |
| 1  | -0.707251000 | -2.572522000 | 1.751997000  |
| 1  | -0.498481000 | -4.005960000 | 0.743913000  |
| 8  | -0.029182000 | 1.630945000  | -0.068406000 |
| 7  | -2.002793000 | -0.144540000 | -0.121685000 |
| 6  | -3.138805000 | -0.087233000 | -0.288125000 |
| 6  | -4.571317000 | -0.016158000 | -0.488138000 |
| 1  | -4.842046000 | 0.936334000  | -0.952769000 |
| 1  | -5.086796000 | -0.104476000 | 0.471468000  |
| 1  | -4.896520000 | -0.835635000 | -1.132243000 |
| 6  | 2.723269000  | 1.031658000  | -0.657803000 |
| 1  | 2.407800000  | 2.020894000  | -0.337525000 |
| 1  | 2.437521000  | 0.873589000  | -1.693951000 |
| 1  | 3.808038000  | 0.941131000  | -0.582362000 |
| 1  | -2.859814000 | 5.733405000  | -0.405981000 |
| 6  | -3.930699000 | 5.893336000  | -0.243667000 |
| 6  | -4.721584000 | 4.832053000  | -0.977270000 |
| 6  | -4.271969000 | 4.309004000  | -2.197829000 |
| 6  | -5.037041000 | 3.382298000  | -2.907800000 |
| 6  | -6.266726000 | 2.953958000  | -2.404555000 |
| 6  | -6.718402000 | 3.453642000  | -1.182075000 |
| 6  | -5.953190000 | 4.385452000  | -0.480502000 |
| 6  | -4.299293000 | 7.321330000  | -0.680444000 |
| 1  | -3.318408000 | 4.637462000  | -2.604425000 |
| 1  | -4.679768000 | 3.006424000  | -3.862527000 |

|   |              |             |              |
|---|--------------|-------------|--------------|
| 1 | -6.871100000 | 2.243545000 | -2.960648000 |
| 1 | -7.677710000 | 3.134098000 | -0.785034000 |
| 1 | -6.322866000 | 4.778372000 | 0.463505000  |
| 1 | -4.098806000 | 5.794440000 | 0.833861000  |
| 1 | -5.356989000 | 7.530388000 | -0.497737000 |
| 1 | -4.111266000 | 7.471198000 | -1.747211000 |
| 1 | -3.711694000 | 8.060702000 | -0.128674000 |

<sup>3</sup>TS<sub>HA</sub>:

|    |              |              |              |
|----|--------------|--------------|--------------|
| 26 | 0.000000000  | 0.000000000  | 0.000000000  |
| 7  | 0.000000000  | 0.000000000  | 1.997814000  |
| 7  | 2.063826000  | 0.000000000  | 0.206522000  |
| 7  | 0.061871000  | -0.178306000 | -2.000151000 |
| 6  | -1.037614000 | -0.062727000 | 2.820804000  |
| 6  | -0.917940000 | 0.096865000  | 4.211098000  |
| 6  | 0.318772000  | 0.348250000  | 4.755620000  |
| 6  | 1.451515000  | 0.417372000  | 3.912247000  |
| 6  | 2.763828000  | 0.662403000  | 4.384117000  |
| 6  | 3.815950000  | 0.698994000  | 3.501577000  |
| 6  | 3.608701000  | 0.489545000  | 2.119534000  |
| 6  | 2.342764000  | 0.259732000  | 1.629920000  |
| 6  | 1.247660000  | 0.224912000  | 2.516801000  |
| 1  | -2.006601000 | -0.246885000 | 2.374865000  |
| 1  | -1.803040000 | 0.024182000  | 4.830564000  |
| 1  | 0.435873000  | 0.490704000  | 5.825727000  |
| 1  | 2.922824000  | 0.819956000  | 5.446134000  |
| 1  | 4.823548000  | 0.885297000  | 3.857319000  |
| 1  | 4.468758000  | 0.510818000  | 1.460346000  |
| 6  | 0.009770000  | 0.836305000  | -2.851054000 |
| 6  | -0.069605000 | 0.654791000  | -4.242739000 |
| 6  | -0.112785000 | -0.621062000 | -4.751451000 |
| 6  | -0.062397000 | -1.728619000 | -3.871283000 |
| 6  | -0.104969000 | -3.075894000 | -4.305215000 |
| 6  | -0.050913000 | -4.096990000 | -3.857073000 |
| 6  | 0.051708000  | -3.822710000 | -2.004522000 |
| 6  | 0.089886000  | -2.523759000 | -1.548549000 |
| 6  | 0.031678000  | -1.460555000 | -2.476181000 |
| 1  | 0.032806000  | 1.825608000  | -2.411135000 |
| 1  | -0.100379000 | 1.524828000  | -4.888313000 |
| 1  | -0.184237000 | -0.790737000 | -5.821563000 |
| 1  | -0.180591000 | -3.287392000 | -5.367210000 |
| 1  | -0.084657000 | -5.130043000 | -3.716137000 |
| 1  | 0.100342000  | -4.657252000 | -1.314311000 |
| 7  | 0.207069000  | -2.168244000 | -0.128004000 |
| 6  | 1.602590000  | -2.427519000 | 0.364302000  |
| 6  | 2.544365000  | -1.377124000 | -0.174102000 |
| 1  | 1.574188000  | -2.409273000 | 1.454468000  |
| 1  | 1.936424000  | -3.425554000 | 0.069367000  |
| 1  | 3.556064000  | -1.537781000 | 0.204273000  |
| 1  | 2.595439000  | -1.414281000 | -1.262261000 |
| 6  | -0.755405000 | -2.952016000 | 0.696262000  |
| 1  | -1.759576000 | -2.840501000 | 0.294891000  |
| 1  | -0.729054000 | -2.589607000 | 1.721424000  |
| 1  | -0.493622000 | -4.011676000 | 0.707353000  |
| 8  | -0.019320000 | 1.664294000  | -0.101609000 |
| 7  | -1.980440000 | -0.160731000 | -0.137880000 |
| 6  | -3.114723000 | -0.143341000 | -0.319158000 |
| 6  | -4.545335000 | -0.108027000 | -0.533147000 |
| 1  | -4.920129000 | 0.885578000  | -0.275878000 |
| 1  | -5.037704000 | -0.849251000 | 0.100986000  |
| 1  | -4.778152000 | -0.324743000 | -1.578079000 |
| 6  | 2.748112000  | 1.014674000  | -0.652266000 |
| 1  | 2.435452000  | 2.009213000  | -0.347807000 |
| 1  | 2.474782000  | 0.846074000  | -1.689744000 |
| 1  | 3.831652000  | 0.921625000  | -0.566843000 |
| 1  | -0.876250000 | 2.660765000  | 0.563505000  |
| 6  | -1.445351000 | 3.541925000  | 1.027596000  |
| 6  | -2.825148000 | 3.632474000  | 0.432229000  |
| 6  | -3.019661000 | 3.939656000  | -0.923898000 |

|   |              |             |              |
|---|--------------|-------------|--------------|
| 6 | -4.299234000 | 4.023576000 | -1.468488000 |
| 6 | -5.421777000 | 3.804574000 | -0.667631000 |
| 6 | -5.247935000 | 3.499076000 | 0.681440000  |
| 6 | -3.962990000 | 3.414059000 | 1.219845000  |
| 6 | -0.575038000 | 4.787347000 | 0.836366000  |
| 1 | -2.161824000 | 4.124189000 | -1.563904000 |
| 1 | -4.422343000 | 4.269366000 | -2.519435000 |
| 1 | -6.419791000 | 3.877946000 | -1.089258000 |
| 1 | -6.112543000 | 3.339541000 | 1.319557000  |
| 1 | -3.841792000 | 3.195557000 | 2.277062000  |
| 1 | -1.528095000 | 3.314587000 | 2.095713000  |
| 1 | -1.037959000 | 5.669656000 | 1.290438000  |
| 1 | -0.408367000 | 5.013199000 | -0.219800000 |
| 1 | 0.405559000  | 4.649956000 | 1.300376000  |

<sup>5</sup>RC<sub>1</sub>:

|    |              |               |              |
|----|--------------|---------------|--------------|
| 26 | 0.000000000  | 0.000000000   | 0.000000000  |
| 7  | 0.000000000  | 0.000000000   | 2.085952000  |
| 7  | 2.210495000  | 0.000000000   | 0.399120000  |
| 7  | 0.077794000  | -0.186253000  | -2.020602000 |
| 6  | -1.082083000 | -0.025898000  | 2.854429000  |
| 6  | -1.039667000 | 0.211548000   | 4.238421000  |
| 6  | 0.167467000  | 0.508377000   | 4.826315000  |
| 6  | 1.342675000  | 0.548620000   | 4.039372000  |
| 6  | 2.618634000  | 0.850907000   | 4.575591000  |
| 6  | 3.721518000  | 0.876007000   | 3.756290000  |
| 6  | 3.598407000  | 0.596068000   | 2.377281000  |
| 6  | 2.372698000  | 0.300702000   | 1.819770000  |
| 6  | 1.220590000  | 0.277111000   | 2.644414000  |
| 1  | -2.024748000 | -0.232794000  | 2.363918000  |
| 1  | -1.958056000 | 0.171421000   | 4.812182000  |
| 1  | 0.230811000  | 0.716118000   | 5.889944000  |
| 1  | 2.708782000  | 1.062230000   | 5.636283000  |
| 1  | 4.700308000  | 1.109727000   | 4.160669000  |
| 1  | 4.491267000  | 0.619193000   | 1.762791000  |
| 6  | -0.032032000 | 0.826479000   | -2.875005000 |
| 6  | -0.043130000 | 0.634294000   | -4.265085000 |
| 6  | 0.066331000  | -0.643893000  | -4.766703000 |
| 6  | 0.194904000  | -1.743221000  | -3.883284000 |
| 6  | 0.323891000  | -3.086081000  | -4.314866000 |
| 6  | 0.457796000  | -4.094536000  | -3.390111000 |
| 6  | 0.466546000  | -3.810764000  | -2.005621000 |
| 6  | 0.323708000  | -2.518046000  | -1.549564000 |
| 6  | 0.193321000  | -1.470311000  | -2.485806000 |
| 1  | -0.115943000 | 1.813673000   | -2.437292000 |
| 1  | -0.134765000 | 1.493494000   | -4.918657000 |
| 1  | 0.058080000  | -0.1818691000 | -5.838160000 |
| 1  | 0.319935000  | -3.303381000  | -5.378034000 |
| 1  | 0.559904000  | -5.124249000  | -3.714443000 |
| 1  | 0.577577000  | -4.634852000  | -1.309152000 |
| 7  | 0.299023000  | -2.156324000  | -0.121302000 |
| 6  | 1.639283000  | -2.409460000  | 0.524756000  |
| 6  | 2.662030000  | -1.391280000  | 0.066749000  |
| 1  | 1.492089000  | -2.359659000  | 1.604206000  |
| 1  | 1.982119000  | -3.420834000  | 0.292049000  |
| 1  | 3.632988000  | -1.601109000  | 0.524811000  |
| 1  | 2.798664000  | -1.441169000  | -1.014927000 |
| 6  | -0.747344000 | -2.944955000  | 0.603365000  |
| 1  | -1.706521000 | -2.816678000  | 0.108178000  |
| 1  | -0.814540000 | -2.591842000  | 1.630888000  |
| 1  | -0.490135000 | -4.005994000  | 0.620641000  |
| 8  | -0.057767000 | 1.624929000   | -0.064855000 |
| 7  | -2.222458000 | -0.195000000  | -0.185342000 |
| 6  | -3.344344000 | 0.037821000   | -0.303570000 |
| 6  | -4.764844000 | 0.302516000   | -0.394652000 |
| 1  | -4.965679000 | 1.296467000   | -0.809154000 |
| 1  | -5.199260000 | 0.238406000   | 0.602964000  |
| 1  | -5.241040000 | -0.447564000  | -1.031206000 |
| 6  | 2.905016000  | 1.001069000   | -0.460261000 |

|   |              |             |              |
|---|--------------|-------------|--------------|
| 1 | 2.582401000  | 2.000218000 | -0.177513000 |
| 1 | 2.638965000  | 0.820605000 | -1.500294000 |
| 1 | 3.991123000  | 0.924017000 | -0.366712000 |
| 1 | -5.076541000 | 7.275163000 | -1.498722000 |
| 6 | -6.081182000 | 7.044783000 | -1.130006000 |
| 6 | -6.437712000 | 5.615839000 | -1.478852000 |
| 6 | -5.962448000 | 5.003134000 | -2.646387000 |
| 6 | -6.354427000 | 3.707225000 | -2.991857000 |
| 6 | -7.232641000 | 2.998957000 | -2.170036000 |
| 6 | -7.700948000 | 3.597264000 | -1.000008000 |
| 6 | -7.307410000 | 4.888822000 | -0.658536000 |
| 6 | -7.080785000 | 8.065322000 | -1.699731000 |
| 1 | -5.288942000 | 5.550862000 | -3.300748000 |
| 1 | -5.985973000 | 3.259501000 | -3.910549000 |
| 1 | -7.565973000 | 2.000492000 | -2.437467000 |
| 1 | -8.389895000 | 3.063456000 | -0.355415000 |
| 1 | -7.691355000 | 5.342614000 | 0.252176000  |
| 1 | -6.043658000 | 7.155709000 | -0.041099000 |
| 1 | -8.089876000 | 7.886481000 | -1.317545000 |
| 1 | -7.125855000 | 8.009982000 | -2.790707000 |
| 1 | -6.795475000 | 9.085005000 | -1.425637000 |

<sup>5</sup>TS<sub>HA</sub>:

|    |              |              |              |
|----|--------------|--------------|--------------|
| 26 | 0.115735000  | -0.063531000 | 0.109478000  |
| 7  | 2.241229000  | 0.047894000  | -0.183755000 |
| 7  | 0.471541000  | 2.195934000  | 0.016976000  |
| 7  | -1.993537000 | 0.141619000  | -0.113606000 |
| 6  | 3.047808000  | -1.007624000 | -0.325944000 |
| 6  | 4.452527000  | -0.905023000 | -0.258727000 |
| 6  | 5.025363000  | 0.332462000  | -0.033172000 |
| 6  | 4.200991000  | 1.481665000  | 0.108762000  |
| 6  | 4.719696000  | 2.786748000  | 0.326109000  |
| 6  | 3.863554000  | 3.864054000  | 0.427927000  |
| 6  | 2.462397000  | 3.680576000  | 0.322032000  |
| 6  | 1.921149000  | 2.420688000  | 0.133557000  |
| 6  | 2.783557000  | 1.301110000  | 0.015534000  |
| 1  | 2.566913000  | -1.962842000 | -0.498535000 |
| 1  | 5.059639000  | -1.793555000 | -0.380435000 |
| 1  | 6.102887000  | 0.440195000  | 0.036667000  |
| 1  | 5.793358000  | 2.924423000  | 0.396809000  |
| 1  | 4.255276000  | 4.863032000  | 0.581531000  |
| 1  | 1.817979000  | 4.549901000  | 0.397663000  |
| 6  | -2.825240000 | 0.049640000  | 0.930591000  |
| 6  | -4.227604000 | 0.107766000  | 0.784428000  |
| 6  | -4.771751000 | 0.259555000  | -0.477524000 |
| 6  | -3.920579000 | 0.354401000  | -1.611512000 |
| 6  | -4.407496000 | 0.508513000  | -2.938440000 |
| 6  | -3.523406000 | 0.600069000  | -3.994337000 |
| 6  | -2.125964000 | 0.545361000  | -3.765527000 |
| 6  | -1.616868000 | 0.389499000  | -2.486479000 |
| 6  | -2.507144000 | 0.290982000  | -1.388271000 |
| 1  | -2.351812000 | -0.079817000 | 1.895760000  |
| 1  | -4.859542000 | 0.031553000  | 1.660499000  |
| 1  | -5.847242000 | 0.306997000  | -0.616378000 |
| 1  | -5.478142000 | 0.556635000  | -3.108306000 |
| 1  | -3.890066000 | 0.721014000  | -5.007583000 |
| 1  | -1.457894000 | 0.628115000  | -4.616608000 |
| 7  | -0.174391000 | 0.354142000  | -2.210570000 |
| 6  | 0.437537000  | 1.713851000  | -2.430152000 |
| 6  | -0.003106000 | 2.673576000  | -1.338090000 |
| 1  | 1.523335000  | 1.589436000  | -2.430023000 |
| 1  | 0.151278000  | 2.109862000  | -3.413869000 |
| 1  | 0.383991000  | 3.679602000  | -1.542286000 |
| 1  | -1.093674000 | 2.741591000  | -1.297841000 |
| 6  | 0.526487000  | -0.675961000 | -3.047047000 |
| 1  | 0.038055000  | -1.640014000 | -2.910858000 |
| 1  | 1.564707000  | -0.745971000 | -2.720681000 |
| 1  | 0.512729000  | -0.414391000 | -4.112023000 |
| 8  | 0.103129000  | -0.301338000 | 1.887029000  |

|   |              |              |              |   |              |              |              |
|---|--------------|--------------|--------------|---|--------------|--------------|--------------|
| 7 | -0.095862000 | -2.269841000 | -0.384699000 | 1 | 3.564491000  | -1.515400000 | 0.091681000  |
| 6 | -0.351607000 | -3.396183000 | -0.292233000 | 1 | 2.531466000  | -1.372971000 | -1.325387000 |
| 6 | -0.695976000 | -4.805606000 | -0.191153000 | 6 | -0.711734000 | -2.962618000 | 0.784174000  |
| 1 | -0.399308000 | -5.194410000 | 0.788260000  | 1 | -1.735419000 | -2.857043000 | 0.433033000  |
| 1 | -0.191478000 | -5.382690000 | -0.973388000 | 1 | -0.634192000 | -2.587853000 | 1.802428000  |
| 1 | -1.777059000 | -4.937392000 | -0.308668000 | 1 | -0.447566000 | -4.021786000 | 0.794269000  |
| 6 | -0.294739000 | 2.855575000  | 1.128190000  | 8 | -0.044531000 | 1.635472000  | -0.079423000 |
| 1 | 0.074337000  | 2.479389000  | 2.080554000  | 7 | -1.996086000 | -0.228465000 | -0.124931000 |
| 1 | -1.347778000 | 2.593158000  | 1.022401000  | 6 | -3.133684000 | -0.307429000 | -0.274690000 |
| 1 | -0.200503000 | 3.946461000  | 1.091070000  | 6 | -4.565656000 | -0.437234000 | -0.456446000 |
| 1 | 0.599319000  | -0.807920000 | 2.872028000  | 1 | -5.098334000 | 0.228416000  | 0.226766000  |
| 6 | 1.176145000  | -1.199796000 | 4.046765000  | 1 | -4.873520000 | -1.466683000 | -0.255293000 |
| 6 | 0.954141000  | -2.636707000 | 4.069505000  | 1 | -4.838946000 | -0.183074000 | -1.482875000 |
| 6 | -0.234011000 | -3.220570000 | 4.585680000  | 6 | 2.724421000  | 1.046026000  | -0.629283000 |
| 6 | -0.399263000 | -4.603211000 | 4.586390000  | 1 | 2.408689000  | 2.027637000  | -0.286575000 |
| 6 | 0.599785000  | -5.437908000 | 4.055216000  | 1 | 2.437936000  | 0.911287000  | -1.668596000 |
| 6 | 1.766037000  | -4.876917000 | 3.506506000  | 1 | 3.809259000  | 0.954908000  | -0.556223000 |
| 6 | 1.936102000  | -3.496297000 | 3.504875000  | 1 | 0.093822000  | 4.632056000  | -0.116079000 |
| 6 | 0.531088000  | -0.265672000 | 5.047320000  | 6 | -0.539937000 | 5.528211000  | 0.027799000  |
| 1 | -1.010380000 | -2.589133000 | 5.003312000  | 6 | 0.343107000  | 6.689669000  | 0.307905000  |
| 1 | -1.296420000 | -5.039367000 | 5.012453000  | 6 | 0.290413000  | 7.907480000  | -0.435405000 |
| 1 | 0.475393000  | -6.515318000 | 4.080747000  | 6 | 1.096446000  | 8.960398000  | -0.088015000 |
| 1 | 2.544778000  | -5.520552000 | 3.111142000  | 6 | 1.996284000  | 8.840463000  | 1.014278000  |
| 1 | 2.843871000  | -3.059843000 | 3.097547000  | 6 | 2.073526000  | 7.639192000  | 1.760474000  |
| 1 | 2.198536000  | -0.918783000 | 3.772905000  | 6 | 1.269540000  | 6.587142000  | 1.414543000  |
| 1 | 0.977277000  | -0.423213000 | 6.039268000  | 6 | -1.567525000 | 5.658570000  | -1.090528000 |
| 1 | -0.547358000 | -0.423633000 | 5.144154000  | 1 | -0.393744000 | 8.001654000  | -1.269457000 |
| 1 | 0.696722000  | 0.779509000  | 4.771386000  | 1 | 1.058542000  | 9.893276000  | -0.639296000 |
|   |              |              |              | 1 | 2.626073000  | 9.682747000  | 1.281505000  |
|   |              |              |              | 1 | 2.759311000  | 7.570620000  | 2.597181000  |
|   |              |              |              | 1 | 1.300810000  | 5.657690000  | 1.974650000  |
|   |              |              |              | 1 | -1.040166000 | 5.297706000  | 0.982213000  |
|   |              |              |              | 1 | -2.253879000 | 6.491017000  | -0.917680000 |
|   |              |              |              | 1 | -2.166470000 | 4.747927000  | -1.138912000 |
|   |              |              |              | 1 | -1.098959000 | 5.802247000  | -2.067533000 |

<sup>2</sup>RC<sub>2</sub>:

|    |              |              |              |
|----|--------------|--------------|--------------|
| 26 | 0.000000000  | 0.000000000  | 0.000000000  |
| 7  | 0.000000000  | 0.000000000  | 1.992671000  |
| 7  | 2.053110000  | 0.000000000  | 0.205467000  |
| 7  | 0.031067000  | -0.216877000 | -1.991615000 |
| 6  | -1.047357000 | -0.046478000 | 2.805865000  |
| 6  | -0.929611000 | 0.063108000  | 4.201866000  |
| 6  | 0.314184000  | 0.246437000  | 4.760825000  |
| 6  | 1.453855000  | 0.314814000  | 3.923289000  |
| 6  | 2.772345000  | 0.513698000  | 4.402259000  |
| 6  | 3.825602000  | 0.565456000  | 3.519447000  |
| 6  | 3.616431000  | 0.408678000  | 2.129434000  |
| 6  | 2.345273000  | 0.214901000  | 1.636003000  |
| 6  | 1.250964000  | 0.174413000  | 2.521369000  |
| 1  | -2.019637000 | -0.174990000 | 2.349608000  |
| 1  | -1.823883000 | 0.008415000  | 4.811315000  |
| 1  | 0.430198000  | 0.343945000  | 5.836016000  |
| 1  | 2.936105000  | 0.625052000  | 5.469288000  |
| 1  | 4.835863000  | 0.718971000  | 3.882403000  |
| 1  | 4.476876000  | 0.437465000  | 1.470868000  |
| 6  | -0.022977000 | 0.788539000  | -2.856800000 |
| 6  | -0.136314000 | 0.588732000  | -4.243336000 |
| 6  | -0.217528000 | -0.693985000 | -4.734012000 |
| 6  | -0.170278000 | -1.790298000 | -3.839756000 |
| 6  | -0.252605000 | -3.142501000 | -4.254237000 |
| 6  | -0.198493000 | -4.152757000 | -3.323160000 |
| 6  | -0.052619000 | -3.862266000 | -1.947314000 |
| 6  | 0.026302000  | -2.557480000 | -1.510245000 |
| 6  | -0.035232000 | -1.506459000 | -2.450071000 |
| 1  | 0.021722000  | 1.784480000  | -2.434154000 |
| 1  | -0.167956000 | 1.449446000  | -4.901270000 |
| 1  | -0.316925000 | -0.875218000 | -5.799700000 |
| 1  | -0.358570000 | -3.365677000 | -5.310968000 |
| 1  | -0.263221000 | -5.188981000 | -3.636234000 |
| 1  | -0.002551000 | -4.688512000 | -1.247699000 |
| 7  | 0.207862000  | -2.185282000 | -0.099454000 |
| 6  | 1.630014000  | -2.434090000 | 0.329417000  |
| 6  | 2.533477000  | -1.363628000 | -0.235670000 |
| 1  | 1.651018000  | -2.428804000 | 1.420051000  |
| 1  | 1.960199000  | -3.423533000 | 0.003387000  |

<sup>2</sup>TS<sub>HA</sub>:

|    |              |              |              |
|----|--------------|--------------|--------------|
| 26 | 0.000000000  | 0.000000000  | 0.000000000  |
| 7  | 0.000000000  | 0.000000000  | 1.981006000  |
| 7  | 2.056016000  | 0.000000000  | 0.187016000  |
| 7  | 0.030149000  | -0.209359000 | -1.998073000 |
| 6  | -1.049198000 | -0.037697000 | 2.800152000  |
| 6  | -0.920577000 | 0.076057000  | 4.193462000  |
| 6  | 0.328564000  | 0.248812000  | 4.747995000  |
| 6  | 1.465850000  | 0.302915000  | 3.908575000  |
| 6  | 2.787655000  | 0.490986000  | 4.384408000  |
| 6  | 3.839240000  | 0.534567000  | 3.499499000  |
| 6  | 3.625003000  | 0.384845000  | 2.109953000  |
| 6  | 2.350282000  | 0.203384000  | 1.619710000  |
| 6  | 1.257246000  | 0.164765000  | 2.506372000  |
| 1  | -2.027648000 | -0.160436000 | 2.352211000  |
| 1  | -1.810435000 | 0.028143000  | 4.809489000  |
| 1  | 0.448997000  | 0.344717000  | 5.822626000  |
| 1  | 2.955414000  | 0.600113000  | 5.450790000  |
| 1  | 4.851618000  | 0.680689000  | 3.859245000  |
| 1  | 4.483307000  | 0.412596000  | 1.448529000  |
| 6  | -0.024612000 | 0.796208000  | -2.863764000 |
| 6  | -0.127581000 | 0.591889000  | -4.250251000 |
| 6  | -0.192681000 | -0.692320000 | -4.739697000 |
| 6  | -0.141278000 | -1.787796000 | -3.844856000 |
| 6  | -0.198891000 | -3.142001000 | -4.257809000 |
| 6  | -0.136306000 | -4.150624000 | -3.325231000 |
| 6  | -0.007703000 | -3.856844000 | -1.948392000 |
| 6  | 0.048135000  | -2.549426000 | -1.516064000 |
| 6  | -0.021974000 | -1.500786000 | -2.454818000 |
| 1  | 0.007608000  | 1.793864000  | -2.442897000 |
| 1  | -0.159897000 | 1.451086000  | -4.909501000 |
| 1  | -0.281193000 | -0.875648000 | -5.805926000 |
| 1  | -0.290062000 | -3.368671000 | -5.315147000 |



|   |              |              |              |   |              |              |              |
|---|--------------|--------------|--------------|---|--------------|--------------|--------------|
| 1 | -0.178323000 | -5.188046000 | -3.638112000 | 6 | -0.029316000 | -3.887983000 | -1.924692000 |
| 1 | 0.054006000  | -4.681647000 | -1.247856000 | 6 | 0.040824000  | -2.579553000 | -1.494552000 |
| 7 | 0.221899000  | -2.168242000 | -0.104588000 | 6 | -0.040446000 | -1.532639000 | -2.435705000 |
| 6 | 1.645252000  | -2.426367000 | 0.324920000  | 1 | 0.004168000  | 1.761899000  | -2.437381000 |
| 6 | 2.542532000  | -1.363285000 | -0.252554000 | 1 | -0.173793000 | 1.418763000  | -4.901985000 |
| 1 | 1.670383000  | -2.416698000 | 1.415187000  | 1 | -0.318537000 | -0.913638000 | -5.789392000 |
| 1 | 1.964862000  | -3.419257000 | 0.000471000  | 1 | -0.356217000 | -3.405623000 | -5.289256000 |
| 1 | 3.575970000  | -1.504689000 | 0.071020000  | 1 | -0.234598000 | -5.221480000 | -3.609298000 |
| 1 | 2.536879000  | -1.377368000 | -1.342287000 | 1 | 0.042206000  | -4.711352000 | -1.223209000 |
| 6 | -0.694825000 | -2.953398000 | 0.778635000  | 7 | 0.232782000  | -2.201664000 | -0.083426000 |
| 1 | -1.716420000 | -2.867347000 | 0.418033000  | 6 | 1.662563000  | -2.435824000 | 0.347896000  |
| 1 | -0.626791000 | -2.574952000 | -1.795700000 | 6 | 2.548894000  | -1.366379000 | -0.240594000 |
| 1 | -0.409622000 | -4.006782000 | 0.791857000  | 1 | 1.686047000  | -2.409305000 | 1.438158000  |
| 8 | -0.059442000 | 1.654873000  | -0.147778000 | 1 | 1.994216000  | -3.428406000 | 0.031576000  |
| 7 | -1.998492000 | -0.209680000 | -0.136619000 | 1 | 3.585612000  | -1.501513000 | 0.077744000  |
| 6 | -3.128203000 | -0.257751000 | -0.347456000 | 1 | 2.530820000  | -1.376810000 | -1.330078000 |
| 6 | -4.552647000 | -0.317330000 | -0.600061000 | 6 | -0.676398000 | -2.982846000 | 0.816486000  |
| 1 | -5.038701000 | 0.581562000  | -0.211802000 | 1 | -1.700329000 | -2.899924000 | 0.460849000  |
| 1 | -4.985109000 | -1.194327000 | -0.111292000 | 1 | -0.601246000 | -2.593037000 | 1.829210000  |
| 1 | -4.739592000 | -0.381618000 | -1.675263000 | 1 | -0.387981000 | -4.036096000 | 0.836362000  |
| 6 | 2.730669000  | 1.045197000  | -0.648897000 | 8 | -0.097953000 | 1.670388000  | -0.076335000 |
| 1 | 2.431703000  | 2.030677000  | -0.306521000 | 7 | -2.019999000 | -0.260345000 | -0.166780000 |
| 1 | 2.441698000  | 0.912986000  | -1.687643000 | 6 | -3.139774000 | -0.331723000 | -0.419267000 |
| 1 | 3.813836000  | 0.938366000  | -0.576958000 | 6 | -4.548051000 | -0.419949000 | -0.753803000 |
| 1 | -0.272370000 | 2.772438000  | 0.733561000  | 1 | -5.116995000 | 0.328993000  | -0.195664000 |
| 6 | -0.282752000 | 3.735958000  | 1.518175000  | 1 | -4.935323000 | -1.413155000 | -0.509451000 |
| 6 | -1.162824000 | 4.688327000  | 0.872472000  | 1 | -4.686929000 | -0.239591000 | -1.824342000 |
| 6 | -0.678414000 | 5.682650000  | -0.035002000 | 6 | 2.737271000  | 1.053021000  | -0.623298000 |
| 6 | -1.531232000 | 6.634380000  | -0.545220000 | 1 | 2.432962000  | 2.032962000  | -0.267481000 |
| 6 | -2.899509000 | 6.613549000  | -0.200643000 | 1 | 2.449289000  | 0.925828000  | -1.663665000 |
| 6 | -3.410589000 | 5.616240000  | 0.655675000  | 1 | 3.821206000  | 0.948887000  | -0.548616000 |
| 6 | -2.565819000 | 4.657383000  | 1.163273000  | 1 | -0.336565000 | 3.025677000  | -0.056555000 |
| 6 | 1.177743000  | 4.085215000  | 1.762366000  | 6 | -0.261045000 | 4.315391000  | -0.032919000 |
| 1 | 0.370306000  | 5.704095000  | -0.304754000 | 6 | -1.596361000 | 4.748239000  | 0.294728000  |
| 1 | -1.157623000 | 7.404461000  | -1.210874000 | 6 | -2.569138000 | 5.072791000  | -0.704879000 |
| 1 | -3.566368000 | 7.368576000  | -0.603825000 | 6 | -3.810194000 | 5.546212000  | -0.342132000 |
| 1 | -4.463936000 | 5.617453000  | 0.911735000  | 6 | -4.139162000 | 5.695862000  | 1.023032000  |
| 1 | -2.946198000 | 3.887644000  | 1.826880000  | 6 | -3.210729000 | 5.354111000  | 2.027339000  |
| 1 | -0.757296000 | 3.272273000  | 2.387700000  | 6 | -1.970551000 | 4.871919000  | 1.674403000  |
| 1 | 1.244418000  | 4.901230000  | 2.489808000  | 6 | 0.392202000  | 4.672942000  | -1.359297000 |
| 1 | 1.705070000  | 4.404293000  | 0.861629000  | 1 | -2.321022000 | 4.968265000  | -1.754198000 |
| 1 | 1.711708000  | 3.231234000  | 2.180707000  | 1 | -4.536010000 | 5.816067000  | -1.101143000 |
|   |              |              |              | 1 | -5.115318000 | 6.078927000  | 1.301196000  |
|   |              |              |              | 1 | -3.474300000 | 5.486739000  | 3.070696000  |
|   |              |              |              | 1 | -1.243288000 | 4.618237000  | 2.439114000  |
|   |              |              |              | 1 | 0.425788000  | 4.388866000  | 0.816223000  |
|   |              |              |              | 1 | 0.646702000  | 5.739801000  | -1.366253000 |
|   |              |              |              | 1 | -0.243344000 | 4.486820000  | -2.229110000 |
|   |              |              |              | 1 | 1.324887000  | 4.121321000  | -1.492188000 |

<sup>4</sup>TS<sub>HA</sub>:

|    |              |              |              |
|----|--------------|--------------|--------------|
| 26 | 0.000000000  | 0.000000000  | 0.000000000  |
| 7  | 0.000000000  | 0.000000000  | 1.984341000  |
| 7  | 2.062006000  | 0.000000000  | 0.207790000  |
| 7  | 0.021475000  | -0.237571000 | -1.985058000 |
| 6  | -1.059396000 | -0.028418000 | 2.789501000  |
| 6  | -0.949940000 | 0.113144000  | 4.182664000  |
| 6  | 0.292349000  | 0.302271000  | 4.748548000  |
| 6  | 1.440478000  | 0.347366000  | 3.921494000  |
| 6  | 2.757957000  | 0.540959000  | 4.408210000  |
| 6  | 3.820120000  | 0.567663000  | 3.533530000  |
| 6  | 3.621003000  | 0.401384000  | 2.142674000  |
| 6  | 2.349985000  | 0.213990000  | 1.643598000  |
| 6  | 1.249660000  | 0.185408000  | 2.519136000  |
| 1  | -2.029063000 | -0.165530000 | 2.329344000  |
| 1  | -1.847251000 | 0.070795000  | 4.788135000  |
| 1  | 0.399218000  | 0.415686000  | 5.822796000  |
| 1  | 2.915463000  | 0.663941000  | 5.474603000  |
| 1  | 4.829047000  | 0.713667000  | 3.902588000  |
| 1  | 4.486560000  | 0.421465000  | 1.490268000  |
| 6  | -0.032555000 | 0.765718000  | -2.855916000 |
| 6  | -0.146173000 | 0.559767000  | -4.240395000 |
| 6  | -0.225609000 | -0.727622000 | -4.724332000 |
| 6  | -0.181701000 | -1.820649000 | -3.825166000 |
| 6  | -0.255090000 | -3.176393000 | -4.233574000 |
| 6  | -0.183243000 | -4.183785000 | -3.299324000 |

UB3LYP-D3 optimized geometries in solvent:

<sup>3</sup>RC<sub>1</sub>:

|    |              |              |              |
|----|--------------|--------------|--------------|
| 26 | -0.206978000 | -0.228835000 | 0.247973000  |
| 7  | 1.752286000  | -0.251618000 | 0.479682000  |
| 7  | -0.026444000 | 1.805549000  | 0.396538000  |
| 7  | -2.150458000 | -0.194834000 | -0.126372000 |
| 6  | 2.546439000  | -1.327699000 | 0.524002000  |
| 6  | 3.909213000  | -1.234725000 | 0.876714000  |
| 6  | 4.448402000  | -0.001343000 | 1.199751000  |
| 6  | 3.626193000  | 1.158707000  | 1.174881000  |
| 6  | 4.080568000  | 2.465415000  | 1.502576000  |
| 6  | 3.205819000  | 3.535318000  | 1.464582000  |
| 6  | 1.845280000  | 3.350338000  | 1.104086000  |
| 6  | 1.378208000  | 2.088721000  | 0.785202000  |
| 6  | 2.257287000  | 0.987811000  | 0.808305000  |
| 1  | 2.091174000  | -2.277456000 | 0.287137000  |
| 1  | 4.511892000  | -2.133746000 | 0.897808000  |
| 1  | 5.492223000  | 0.090811000  | 1.480038000  |
| 1  | 5.117391000  | 2.609762000  | 1.785592000  |
| 1  | 3.551747000  | 4.530737000  | 1.716153000  |
| 1  | 1.185631000  | 4.210428000  | 1.090485000  |
| 6  | -3.099404000 | -0.335631000 | 0.807219000  |
| 6  | -4.463027000 | -0.460869000 | 0.465901000  |
| 6  | -4.836354000 | -0.455282000 | -0.867022000 |
| 6  | -3.846924000 | -0.322028000 | -1.880644000 |
| 6  | -4.130134000 | -0.319131000 | -3.274091000 |
| 6  | -3.104564000 | -0.192299000 | -4.192343000 |
| 6  | -1.757767000 | -0.060299000 | -3.763878000 |
| 6  | -1.451824000 | -0.063441000 | -2.414940000 |
| 6  | -2.487510000 | -0.191625000 | -1.463363000 |
| 1  | -2.757454000 | -0.354516000 | 1.833392000  |
| 1  | -5.197180000 | -0.564302000 | 1.254851000  |
| 1  | -5.878424000 | -0.524355000 | -1.150660000 |
| 1  | -5.157858000 | -0.418719000 | -3.604918000 |
| 1  | -3.321324000 | -0.190754000 | -5.253954000 |
| 1  | -0.978304000 | 0.043465000  | -4.510378000 |
| 7  | -0.080723000 | 0.085552000  | -1.884419000 |
| 6  | 0.393228000  | 1.519726000  | -2.018341000 |
| 6  | -0.322053000 | 2.365999000  | -0.985401000 |
| 1  | 1.472395000  | 1.524355000  | -1.845706000 |
| 1  | 0.206465000  | 1.889365000  | -3.032695000 |
| 1  | -0.004282000 | 3.412475000  | -1.035772000 |
| 1  | -1.404503000 | 2.328939000  | -1.125457000 |
| 6  | 0.881882000  | -0.842262000 | -2.573836000 |
| 1  | 0.490849000  | -1.856734000 | -2.525155000 |
| 1  | 1.840522000  | -0.794354000 | -2.059718000 |
| 1  | 1.025294000  | -0.555720000 | -3.620218000 |
| 8  | -0.436591000 | -0.370973000 | 1.882828000  |
| 7  | -0.346284000 | -2.193335000 | -0.050796000 |
| 6  | -0.588956000 | -3.332905000 | -0.014100000 |
| 6  | -0.887757000 | -4.752458000 | 0.012923000  |
| 1  | -1.699763000 | -4.941215000 | 0.725483000  |
| 1  | -0.016107000 | -5.317484000 | 0.356240000  |
| 1  | -1.181670000 | -5.106203000 | -0.980606000 |
| 6  | -0.988017000 | 2.381802000  | 1.408914000  |
| 1  | -0.744138000 | 1.973986000  | 2.387907000  |
| 1  | -1.998459000 | 2.089852000  | 1.130854000  |
| 1  | -0.919451000 | 3.472826000  | 1.421740000  |
| 1  | 0.961086000  | -2.265706000 | 2.735282000  |
| 6  | 0.989817000  | -3.131429000 | 3.410783000  |
| 6  | -0.309601000 | -3.906369000 | 3.288977000  |
| 6  | -1.533091000 | -3.225164000 | 3.130883000  |
| 6  | -2.742557000 | -3.926675000 | 3.052654000  |
| 6  | -2.751912000 | -5.327059000 | 3.140316000  |
| 6  | -1.542024000 | -6.015272000 | 3.314354000  |
| 6  | -0.333411000 | -5.309640000 | 3.384761000  |
| 6  | 1.243109000  | -2.627446000 | 4.849178000  |
| 1  | -1.523487000 | -2.140541000 | 3.086694000  |

|   |              |              |             |
|---|--------------|--------------|-------------|
| 1 | -3.678645000 | -3.386182000 | 2.945340000 |
| 1 | -3.688312000 | -5.873002000 | 3.097895000 |
| 1 | -1.542132000 | -7.096635000 | 3.404262000 |
| 1 | 0.597786000  | -5.850384000 | 3.531078000 |
| 1 | 1.829688000  | -3.767390000 | 3.097685000 |
| 1 | 1.296109000  | -3.465218000 | 5.552097000 |
| 1 | 0.431061000  | -1.967723000 | 5.174215000 |
| 1 | 2.184774000  | -2.069825000 | 4.909697000 |

<sup>3</sup>TS<sub>HA</sub>:

|    |              |              |              |
|----|--------------|--------------|--------------|
| 26 | -0.200769000 | 0.098745000  | 0.050065000  |
| 7  | 1.757493000  | -0.097578000 | 0.219871000  |
| 7  | 0.181403000  | 2.109319000  | -0.084970000 |
| 7  | -2.149216000 | 0.280012000  | -0.256055000 |
| 6  | 2.456311000  | -1.230449000 | 0.353276000  |
| 6  | 3.839639000  | -1.228190000 | 0.632315000  |
| 6  | 4.500590000  | -0.024199000 | 0.799195000  |
| 6  | 3.782598000  | 1.197855000  | 0.680500000  |
| 6  | 4.368197000  | 2.482100000  | 0.848736000  |
| 6  | 3.595058000  | 3.620248000  | 0.716544000  |
| 6  | 2.212105000  | 3.527888000  | 0.410514000  |
| 6  | 1.616379000  | 2.290599000  | 0.249068000  |
| 6  | 2.388908000  | 1.118219000  | 0.380097000  |
| 1  | 1.908766000  | -2.156244000 | 0.263537000  |
| 1  | 4.360992000  | -2.172499000 | 0.725138000  |
| 1  | 5.560968000  | 0.000015000  | 1.026620000  |
| 1  | 5.424380000  | 2.555374000  | 1.083571000  |
| 1  | 4.040186000  | 4.599417000  | 0.846479000  |
| 1  | 1.636754000  | 4.441102000  | 0.311199000  |
| 6  | -3.064704000 | 0.358064000  | 0.716945000  |
| 6  | -4.448422000 | 0.338222000  | 0.437619000  |
| 6  | -4.878268000 | 0.226000000  | -0.873126000 |
| 6  | -3.926236000 | 0.130033000  | -1.926524000 |
| 6  | -4.270430000 | 0.001204000  | -3.300012000 |
| 6  | -3.279432000 | -0.092638000 | -4.259312000 |
| 6  | -1.908384000 | -0.061832000 | -3.893008000 |
| 6  | -1.543331000 | 0.054564000  | -2.563904000 |
| 6  | -2.543223000 | 0.160090000  | -1.571440000 |
| 1  | -2.677874000 | 0.425985000  | 1.725600000  |
| 1  | -5.153313000 | 0.407974000  | 1.256452000  |
| 1  | -5.936704000 | 0.206270000  | -1.109222000 |
| 1  | -5.317091000 | -0.023250000 | -3.582987000 |
| 1  | -3.542314000 | -0.189175000 | -5.306012000 |
| 1  | -1.156766000 | -0.134634000 | -4.671097000 |
| 7  | -0.139458000 | 0.107933000  | -2.100874000 |
| 6  | 0.487368000  | 1.445562000  | -2.443994000 |
| 6  | -0.085323000 | 2.505848000  | -1.526477000 |
| 1  | 1.566270000  | 1.345216000  | -2.300598000 |
| 1  | 0.305264000  | 1.691928000  | -3.495941000 |
| 1  | 0.352437000  | 3.488625000  | -1.729464000 |
| 1  | -1.168651000 | 2.582077000  | -1.644173000 |
| 6  | 0.677045000  | -1.007639000 | -2.691779000 |
| 1  | 0.177275000  | -1.954039000 | -2.495019000 |
| 1  | 1.659609000  | -1.007236000 | -2.224950000 |
| 1  | 0.799385000  | -0.878780000 | -3.771653000 |
| 8  | -0.400307000 | 0.243532000  | 1.717369000  |
| 7  | -0.514829000 | -1.864609000 | 0.064797000  |
| 6  | -0.794492000 | -2.987819000 | 0.196056000  |
| 6  | -1.136359000 | -4.388791000 | 0.356354000  |
| 1  | -0.936604000 | -4.700664000 | 1.387994000  |
| 1  | -0.536763000 | -5.010788000 | -0.316459000 |
| 1  | -2.196421000 | -4.550803000 | 0.134596000  |
| 6  | -0.691147000 | 2.914346000  | 0.846953000  |
| 1  | -0.462567000 | 2.623025000  | 1.870076000  |
| 1  | -1.732070000 | 2.688151000  | 0.626201000  |
| 1  | -0.518491000 | 3.984668000  | 0.705321000  |
| 1  | 0.440392000  | -0.752213000 | 2.779553000  |
| 6  | 1.086841000  | -1.307518000 | 3.520084000  |
| 6  | 0.829826000  | -2.793473000 | 3.423919000  |

|   |              |              |             |
|---|--------------|--------------|-------------|
| 6 | -0.352923000 | -3.368628000 | 3.933694000 |
| 6 | -0.556000000 | -4.753777000 | 3.896167000 |
| 6 | 0.413072000  | -5.597170000 | 3.329442000 |
| 6 | 1.583163000  | -5.039400000 | 2.795197000 |
| 6 | 1.785246000  | -3.654418000 | 2.844032000 |
| 6 | 0.826122000  | -0.686778000 | 4.903682000 |
| 1 | -1.101572000 | -2.735023000 | 4.398203000 |
| 1 | -1.456816000 | -5.178248000 | 4.328002000 |
| 1 | 0.265928000  | -6.672053000 | 3.322421000 |
| 1 | 2.347136000  | -5.684494000 | 2.372589000 |
| 1 | 2.720877000  | -3.237193000 | 2.480705000 |
| 1 | 2.120678000  | -1.096393000 | 3.214333000 |
| 1 | 1.457650000  | -1.157175000 | 5.665926000 |
| 1 | -0.216748000 | -0.806080000 | 5.215035000 |
| 1 | 1.048260000  | 0.385570000  | 4.890520000 |

<sup>5</sup>RC<sub>1</sub>:

|    |              |              |              |
|----|--------------|--------------|--------------|
| 26 | -0.591313000 | 0.292347000  | -0.325337000 |
| 7  | -0.639867000 | 0.722471000  | 1.675802000  |
| 7  | 1.586208000  | 0.693538000  | 0.010516000  |
| 7  | -0.443862000 | -0.281643000 | -2.240182000 |
| 6  | -1.744197000 | 0.694304000  | 2.432384000  |
| 6  | -1.772553000 | 1.234958000  | 3.733784000  |
| 6  | -0.634255000 | 1.836878000  | 4.240143000  |
| 6  | 0.552214000  | 1.889705000  | 3.457632000  |
| 6  | 1.757820000  | 2.494331000  | 3.905885000  |
| 6  | 2.873458000  | 2.508809000  | 3.091142000  |
| 6  | 2.833053000  | 1.918203000  | 1.802884000  |
| 6  | 1.674134000  | 1.324497000  | 1.333726000  |
| 6  | 0.517541000  | 1.304969000  | 2.153026000  |
| 1  | -2.623609000 | 0.253937000  | 1.983446000  |
| 1  | -2.687903000 | 1.185753000  | 4.309291000  |
| 1  | -0.635239000 | 2.276526000  | 5.231839000  |
| 1  | 1.788079000  | 2.942672000  | 4.892636000  |
| 1  | 3.791978000  | 2.971778000  | 3.431424000  |
| 1  | 3.725377000  | 1.940801000  | 1.187455000  |
| 6  | -0.684243000 | 0.517457000  | -3.290306000 |
| 6  | -0.621579000 | 0.034286000  | -4.612467000 |
| 6  | -0.305823000 | -1.297048000 | -4.838357000 |
| 6  | -0.052472000 | -2.167845000 | -3.742437000 |
| 6  | 0.275532000  | -3.545108000 | -3.876281000 |
| 6  | 0.505200000  | -4.317138000 | -2.752147000 |
| 6  | 0.417314000  | -3.753318000 | -1.452617000 |
| 6  | 0.098048000  | -2.416650000 | -1.293078000 |
| 6  | -0.136335000 | -1.614484000 | -2.428901000 |
| 1  | -0.928181000 | 1.546311000  | -3.057081000 |
| 1  | -0.818687000 | 0.711024000  | -5.434083000 |
| 1  | -0.249822000 | -1.686124000 | -5.849341000 |
| 1  | 0.342530000  | -3.979687000 | -4.867517000 |
| 1  | 0.755201000  | -5.366402000 | -2.854098000 |
| 1  | 0.601589000  | -4.386146000 | -0.591508000 |
| 7  | -0.008519000 | -1.751029000 | 0.025088000  |
| 6  | 1.347905000  | -1.669182000 | 0.707024000  |
| 6  | 2.232714000  | -0.669530000 | -0.018766000 |
| 1  | 1.169065000  | -1.354610000 | 1.737450000  |
| 1  | 1.813916000  | -2.660439000 | 0.728960000  |
| 1  | 3.229260000  | -0.630768000 | 0.436700000  |
| 1  | 2.351300000  | -0.952041000 | -1.068419000 |
| 6  | -0.996225000 | -2.465119000 | 0.912402000  |
| 1  | -1.948422000 | -2.535815000 | 0.390647000  |
| 1  | -1.121806000 | -1.885279000 | 1.825738000  |
| 1  | -0.635823000 | -3.466084000 | 1.168445000  |
| 8  | -0.874058000 | 1.868669000  | -0.736163000 |
| 7  | -2.818217000 | -0.237628000 | -0.445132000 |
| 6  | -3.916085000 | -0.087454000 | -0.820105000 |
| 6  | -5.278210000 | 0.094622000  | -1.286999000 |
| 1  | -5.318099000 | 0.939307000  | -1.984459000 |
| 1  | -5.937536000 | 0.334443000  | -0.447625000 |
| 1  | -5.641934000 | -0.810754000 | -1.783653000 |

|   |              |             |              |
|---|--------------|-------------|--------------|
| 6 | 2.094784000  | 1.581140000 | -1.087396000 |
| 1 | 1.581600000  | 2.539453000 | -1.020748000 |
| 1 | 1.858865000  | 1.114177000 | -2.043905000 |
| 1 | 3.177668000  | 1.725567000 | -1.016986000 |
| 1 | -2.540206000 | 2.659288000 | 0.782784000  |
| 6 | -3.453352000 | 3.223035000 | 1.007514000  |
| 6 | -4.311703000 | 3.287283000 | -0.240557000 |
| 6 | -3.716478000 | 3.317363000 | -1.516888000 |
| 6 | -4.502621000 | 3.431131000 | -2.671314000 |
| 6 | -5.898784000 | 3.518584000 | -2.567313000 |
| 6 | -6.500983000 | 3.494726000 | -1.301327000 |
| 6 | -5.712708000 | 3.378085000 | -0.149943000 |
| 6 | -3.055932000 | 4.620022000 | 1.532162000  |
| 1 | -2.633944000 | 3.269487000 | -1.596080000 |
| 1 | -4.030162000 | 3.473569000 | -3.648330000 |
| 1 | -6.507894000 | 3.624257000 | -3.458799000 |
| 1 | -7.579159000 | 3.578592000 | -1.212657000 |
| 1 | -6.185493000 | 3.376043000 | 0.828697000  |
| 1 | -3.991030000 | 2.680878000 | 1.798954000  |
| 1 | -3.942634000 | 5.210181000 | 1.785621000  |
| 1 | -2.493530000 | 5.171493000 | 0.770806000  |
| 1 | -2.431132000 | 4.538202000 | 2.429967000  |

<sup>5</sup>TS<sub>HA</sub>:

|    |              |              |              |
|----|--------------|--------------|--------------|
| 26 | 0.002172000  | -0.003544000 | 0.012880000  |
| 7  | 2.150766000  | 0.003302000  | -0.000789000 |
| 7  | 0.479463000  | 2.235736000  | 0.005032000  |
| 7  | -2.043307000 | 0.319169000  | -0.493380000 |
| 6  | 2.915995000  | -1.090179000 | -0.059481000 |
| 6  | 4.303716000  | -1.060394000 | 0.188564000  |
| 6  | 4.902883000  | 0.143304000  | 0.508945000  |
| 6  | 4.124627000  | 1.331408000  | 0.565921000  |
| 6  | 4.674516000  | 2.605853000  | 0.870890000  |
| 6  | 3.866447000  | 3.724367000  | 0.880491000  |
| 6  | 2.483581000  | 3.613968000  | 0.591385000  |
| 6  | 1.910277000  | 2.385414000  | 0.312994000  |
| 6  | 2.724115000  | 1.224707000  | 0.288054000  |
| 1  | 2.415185000  | -2.016750000 | -0.312810000 |
| 1  | 4.877120000  | -1.977126000 | 0.127838000  |
| 1  | 5.966483000  | 0.194904000  | 0.717731000  |
| 1  | 5.735809000  | 2.687993000  | 1.079628000  |
| 1  | 4.283684000  | 4.700331000  | 1.100440000  |
| 1  | 1.878352000  | 4.514182000  | 0.598482000  |
| 6  | -3.015338000 | 0.262710000  | 0.424415000  |
| 6  | -4.378923000 | 0.399607000  | 0.087233000  |
| 6  | -4.734553000 | 0.594148000  | -1.234643000 |
| 6  | -3.731262000 | 0.653590000  | -2.239017000 |
| 6  | -4.021979000 | 0.848359000  | -3.617379000 |
| 6  | -2.997762000 | 0.902277000  | -4.540851000 |
| 6  | -1.650204000 | 0.768146000  | -4.123912000 |
| 6  | -1.331397000 | 0.570647000  | -2.790146000 |
| 6  | -2.367429000 | 0.509761000  | -1.824802000 |
| 1  | -2.687744000 | 0.097897000  | 1.443151000  |
| 1  | -5.129538000 | 0.349583000  | 0.866102000  |
| 1  | -5.776416000 | 0.702230000  | -1.519432000 |
| 1  | -5.054875000 | 0.957440000  | -3.931592000 |
| 1  | -3.214878000 | 1.053990000  | -5.592383000 |
| 1  | -0.867948000 | 0.822980000  | -4.874022000 |
| 7  | 0.055788000  | 0.454479000  | -2.322263000 |
| 6  | 0.759071000  | 1.782502000  | -2.432828000 |
| 6  | 0.220532000  | 2.751347000  | -1.394023000 |
| 1  | 1.827201000  | 1.601752000  | -2.288493000 |
| 1  | 0.629087000  | 2.203664000  | -3.438969000 |
| 1  | 0.682023000  | 3.737878000  | -1.526056000 |
| 1  | -0.860366000 | 2.875722000  | -1.502660000 |
| 6  | 0.809084000  | -0.601680000 | -3.076840000 |
| 1  | 0.257169000  | -1.539440000 | -3.026953000 |
| 1  | 1.788380000  | -0.732098000 | -2.615082000 |
| 1  | 0.953644000  | -0.326402000 | -4.128620000 |

|   |              |              |              |   |              |              |              |
|---|--------------|--------------|--------------|---|--------------|--------------|--------------|
| 8 | -0.265498000 | -0.259818000 | 1.770849000  | 1 | -0.222253000 | 3.294009000  | -4.188041000 |
| 7 | -0.251604000 | -2.185135000 | -0.564576000 | 1 | -1.024908000 | 2.555576000  | -1.916062000 |
| 6 | -0.570993000 | -3.298652000 | -0.539460000 | 1 | -2.033392000 | 1.830725000  | -3.182261000 |
| 6 | -0.992893000 | -4.690462000 | -0.528598000 | 6 | 1.176627000  | 1.409646000  | -5.807926000 |
| 1 | -0.848668000 | -5.117007000 | 0.469169000  | 1 | 1.097491000  | 0.729111000  | -6.655852000 |
| 1 | -0.416533000 | -5.273522000 | -1.254806000 | 1 | 2.041029000  | 1.142130000  | -5.201319000 |
| 1 | -2.053540000 | -4.763370000 | -0.792574000 | 1 | 1.304147000  | 2.434333000  | -6.174393000 |
| 6 | -0.391950000 | 2.923346000  | 1.017234000  | 8 | -0.549822000 | -2.061201000 | -3.194845000 |
| 1 | -0.170354000 | 2.519316000  | 2.003270000  | 7 | 0.204621000  | -1.575840000 | -5.675019000 |
| 1 | -1.433777000 | 2.716892000  | 0.770320000  | 6 | 0.334278000  | -2.286289000 | -6.584945000 |
| 1 | -0.239146000 | 4.008194000  | 1.010404000  | 6 | 0.496402000  | -3.188818000 | -7.713588000 |
| 1 | 0.062107000  | -0.802176000 | 2.809653000  | 1 | 0.480596000  | -4.228717000 | -7.367674000 |
| 6 | 0.448793000  | -1.240869000 | 4.043068000  | 1 | 1.449865000  | -3.006031000 | -8.220800000 |
| 6 | 0.144877000  | -2.662466000 | 4.000756000  | 1 | -0.315092000 | -3.049444000 | -8.436537000 |
| 6 | -1.134588000 | -3.183538000 | 4.333275000  | 6 | -1.846796000 | -0.129117000 | -1.527535000 |
| 6 | -1.375767000 | -4.553918000 | 4.277238000  | 1 | -1.580318000 | -1.138387000 | -1.220663000 |
| 6 | -0.360946000 | -5.437485000 | 3.869186000  | 1 | -2.709354000 | -0.165779000 | -2.188886000 |
| 6 | 0.899558000  | -4.937313000 | 3.499166000  | 1 | -2.087067000 | 0.486296000  | -0.655987000 |
| 6 | 1.145551000  | -3.569239000 | 3.555014000  | 1 | 1.318578000  | 3.490314000  | 19.667900000 |
| 6 | -0.276607000 | -0.285464000 | 4.965226000  | 6 | 1.656678000  | 2.444040000  | 19.814251000 |
| 1 | -1.925135000 | -2.514222000 | 4.654059000  | 6 | 1.593519000  | 2.161787000  | 21.275092000 |
| 1 | -2.346692000 | -4.943325000 | 4.564135000  | 6 | 0.879348000  | 1.042186000  | 21.822565000 |
| 1 | -0.548196000 | -6.505917000 | 3.850666000  | 6 | 0.858722000  | 0.834523000  | 23.184489000 |
| 1 | 1.688373000  | -5.619248000 | 3.199537000  | 6 | 1.554471000  | 1.734728000  | 24.061176000 |
| 1 | 2.123813000  | -3.180517000 | 3.286021000  | 6 | 2.268305000  | 2.851275000  | 23.542111000 |
| 1 | 1.513614000  | -1.016730000 | 3.919968000  | 6 | 2.290783000  | 3.062076000  | 22.181705000 |
| 1 | 0.019401000  | -0.481248000 | 6.005310000  | 6 | 0.910403000  | 1.499075000  | 18.866559000 |
| 1 | -1.365048000 | -0.383694000 | 4.909876000  | 1 | 0.356045000  | 0.366538000  | 21.157170000 |
| 1 | -0.018360000 | 0.752289000  | 4.736395000  | 1 | 0.319129000  | -0.005824000 | 23.607794000 |

<sup>2</sup>RC<sub>2</sub>:

|    |              |              |              |
|----|--------------|--------------|--------------|
| 26 | -0.255121000 | -0.626909000 | -3.969302000 |
| 7  | 1.604910000  | -0.595773000 | -3.299738000 |
| 7  | -0.684188000 | 0.461882000  | -2.289987000 |
| 7  | -2.089961000 | -0.526593000 | -4.707464000 |
| 6  | 2.676629000  | -1.162071000 | -3.866025000 |
| 6  | 3.925909000  | -1.216378000 | -3.212992000 |
| 6  | 4.056156000  | -0.681043000 | -1.942211000 |
| 6  | 2.931492000  | -0.087663000 | -1.306712000 |
| 6  | 2.960657000  | 0.484093000  | -0.005531000 |
| 6  | 1.814641000  | 1.029889000  | 0.542087000  |
| 6  | 0.592667000  | 1.027025000  | -0.180207000 |
| 6  | 0.539996000  | 0.480538000  | -1.450357000 |
| 6  | 1.700021000  | -0.071143000 | -2.027967000 |
| 1  | 2.540628000  | -1.584391000 | -4.851155000 |
| 1  | 4.764123000  | -1.683342000 | -3.714052000 |
| 1  | 5.006978000  | -0.715650000 | -1.420743000 |
| 1  | 3.892571000  | 0.487472000  | 0.549578000  |
| 1  | 1.851670000  | 1.479915000  | 1.528171000  |
| 1  | -0.287793000 | 1.464389000  | 0.276825000  |
| 6  | -3.024765000 | -1.468228000 | -4.527468000 |
| 6  | -4.265631000 | -1.420183000 | -5.198028000 |
| 6  | -4.525975000 | -0.385325000 | -6.078999000 |
| 6  | -3.544188000 | 0.619672000  | -6.302608000 |
| 6  | -3.712093000 | 1.709137000  | -7.200044000 |
| 6  | -2.700865000 | 2.637679000  | -7.363316000 |
| 6  | -1.483883000 | 2.521631000  | -6.641380000 |
| 6  | -1.289624000 | 1.469380000  | -5.765537000 |
| 6  | -2.314386000 | 0.514307000  | -5.583496000 |
| 1  | -2.767742000 | -2.269992000 | -3.847308000 |
| 1  | -4.994640000 | -2.199382000 | -5.015239000 |
| 1  | -5.472247000 | -0.332334000 | -6.606781000 |
| 1  | -4.640782000 | 1.800132000  | -7.753069000 |
| 1  | -2.829990000 | 3.468009000  | -8.046940000 |
| 1  | -0.713334000 | 3.270043000  | -6.789862000 |
| 7  | -0.061515000 | 1.284232000  | -4.961998000 |
| 6  | -0.014539000 | 2.283086000  | -3.818873000 |
| 6  | -1.024071000 | 1.865705000  | -2.767515000 |
| 1  | 0.999618000  | 2.270150000  | -3.411907000 |

<sup>2</sup>TS<sub>HA</sub>:

|    |              |              |              |
|----|--------------|--------------|--------------|
| 26 | -0.120035000 | -0.110440000 | -0.215900000 |
| 7  | 1.853272000  | -0.163175000 | -0.149183000 |
| 7  | 0.099864000  | 1.908083000  | 0.039939000  |
| 7  | -2.083955000 | -0.027610000 | -0.462500000 |
| 6  | 2.641933000  | -1.238665000 | -0.270016000 |
| 6  | 4.037613000  | -1.166137000 | -0.077904000 |
| 6  | 4.618614000  | 0.044985000  | 0.261652000  |
| 6  | 3.804863000  | 1.201834000  | 0.415077000  |
| 6  | 4.302233000  | 2.484923000  | 0.775756000  |
| 6  | 3.435648000  | 3.555978000  | 0.902842000  |
| 6  | 2.043085000  | 3.397123000  | 0.672878000  |
| 6  | 1.534912000  | 2.158488000  | 0.325234000  |
| 6  | 2.401545000  | 1.055301000  | 0.192497000  |
| 1  | 2.158650000  | -2.170569000 | -0.524066000 |
| 1  | 4.636287000  | -2.059752000 | -0.202833000 |
| 1  | 5.690347000  | 0.121922000  | 0.412093000  |
| 1  | 5.365931000  | 2.612947000  | 0.944380000  |
| 1  | 3.814981000  | 4.534175000  | 1.173718000  |
| 1  | 1.395219000  | 4.260670000  | 0.772322000  |
| 6  | -2.975209000 | -0.203748000 | 0.523313000  |
| 6  | -4.359996000 | -0.279875000 | 0.269330000  |
| 6  | -4.821176000 | -0.189346000 | -1.033805000 |
| 6  | -3.897846000 | -0.020499000 | -2.102233000 |
| 6  | -4.275017000 | 0.065474000  | -3.470859000 |
| 6  | -3.310910000 | 0.222897000  | -4.449020000 |
| 6  | -1.935539000 | 0.307422000  | -4.106954000 |
| 6  | -1.538872000 | 0.223237000  | -2.783357000 |
| 6  | -2.509227000 | 0.059492000  | -1.772178000 |
| 1  | -2.567243000 | -0.293375000 | 1.521364000  |
| 1  | -5.043915000 | -0.413463000 | 1.098052000  |
| 1  | -5.882292000 | -0.250296000 | -1.250422000 |

|   |              |              |              |   |              |              |              |
|---|--------------|--------------|--------------|---|--------------|--------------|--------------|
| 1 | -5.324842000 | 0.006084000  | -3.735335000 | 6 | 1.072381000  | -3.181229000 | -3.916055000 |
| 1 | -3.598792000 | 0.288342000  | -5.491493000 | 6 | 0.766529000  | -4.049725000 | -2.834394000 |
| 1 | -1.208859000 | 0.440944000  | -4.900333000 | 6 | 0.962628000  | -3.633188000 | -1.528502000 |
| 7 | -0.130559000 | 0.336363000  | -2.335257000 | 6 | 1.477140000  | -2.344647000 | -1.275982000 |
| 6 | 0.335162000  | 1.781501000  | -2.412278000 | 1 | 2.254574000  | -0.508097000 | 1.378145000  |
| 6 | -0.299450000 | 2.557588000  | -1.278890000 | 1 | 2.786134000  | 1.187053000  | -0.417423000 |
| 1 | 1.424604000  | 1.780928000  | -2.326876000 | 1 | 2.498258000  | 0.538233000  | -2.815079000 |
| 1 | 0.069832000  | 2.212325000  | -3.383503000 | 1 | 1.796044000  | -1.247451000 | -4.513138000 |
| 1 | 0.017457000  | 3.605299000  | -1.281317000 | 1 | 0.910821000  | -3.526738000 | -4.930606000 |
| 1 | -1.389329000 | 2.528345000  | -1.335877000 | 1 | 0.374583000  | -5.038496000 | -3.049177000 |
| 6 | 0.783228000  | -0.534759000 | -3.158662000 | 7 | 0.664124000  | -4.474217000 | -0.347388000 |
| 1 | 0.390740000  | -1.549462000 | -3.172431000 | 6 | 1.611667000  | -5.661348000 | -0.273783000 |
| 1 | 1.775483000  | -0.527454000 | -2.711178000 | 6 | 2.999202000  | -5.186432000 | 0.121681000  |
| 1 | 0.858971000  | -0.164444000 | -4.185208000 | 1 | 1.208073000  | -6.348271000 | 0.473660000  |
| 8 | -0.242209000 | -0.362041000 | 1.422172000  | 1 | 1.633431000  | -6.181208000 | -1.238629000 |
| 7 | -0.314067000 | -2.057401000 | -0.655578000 | 1 | 3.707799000  | -6.023436000 | 0.133316000  |
| 6 | -0.576116000 | -3.174793000 | -0.859093000 | 1 | 3.368631000  | -4.439280000 | -0.586682000 |
| 6 | -0.907766000 | -4.569445000 | -1.109915000 | 6 | -0.766668000 | -4.950490000 | -0.370452000 |
| 1 | -0.470131000 | -5.212849000 | -0.338598000 | 1 | -1.422455000 | -4.086054000 | -0.463564000 |
| 1 | -0.526269000 | -4.888656000 | -2.086268000 | 1 | -0.973720000 | -5.470181000 | 0.564426000  |
| 1 | -1.994769000 | -4.708444000 | -1.100818000 | 1 | -0.934969000 | -5.635455000 | -1.207795000 |
| 6 | -0.771286000 | 2.434771000  | 1.154388000  | 8 | 1.553686000  | -2.336825000 | 2.667734000  |
| 1 | -0.449833000 | 1.978304000  | 2.087795000  | 7 | -0.966895000 | -2.238035000 | 1.319035000  |
| 1 | -1.803353000 | 2.161561000  | 0.947284000  | 6 | -1.749768000 | -1.385694000 | 1.482081000  |
| 1 | -0.693312000 | 3.523416000  | 1.215823000  | 6 | -2.730301000 | -0.331866000 | 1.694026000  |
| 1 | 0.824772000  | -0.524697000 | 3.229404000  | 1 | -2.519269000 | 0.198848000  | 2.629010000  |
| 6 | 1.604455000  | -0.320256000 | 4.005666000  | 1 | -3.738969000 | -0.754098000 | 1.753067000  |
| 6 | 1.217135000  | -1.004725000 | 5.271513000  | 1 | -2.703655000 | 0.387939000  | 0.868589000  |
| 6 | 0.344092000  | -0.382682000 | 6.238673000  | 6 | 4.108012000  | -3.627782000 | 1.728690000  |
| 6 | 0.038129000  | -1.022583000 | 7.419794000  | 1 | 3.992941000  | -3.176530000 | 2.714150000  |
| 6 | 0.576531000  | -2.321213000 | 7.687777000  | 1 | 4.104737000  | -2.842125000 | 0.971417000  |
| 6 | 1.425737000  | -2.966019000 | 6.735977000  | 1 | 5.052908000  | -4.178582000 | 1.672448000  |
| 6 | 1.729637000  | -2.327219000 | 5.555002000  | 1 | -2.748340000 | 19.419068000 | -3.900108000 |
| 6 | 1.784785000  | 1.1211936000 | 4.084703000  | 6 | -3.505420000 | 19.413116000 | -3.109297000 |
| 1 | -0.057357000 | 0.602275000  | 6.036630000  | 6 | -4.567460000 | 20.411203000 | -3.377594000 |
| 1 | -0.605149000 | -0.553235000 | 8.155166000  | 6 | -5.340017000 | 20.966410000 | -2.287505000 |
| 1 | 0.335201000  | -2.821593000 | 8.620375000  | 6 | -6.341592000 | 21.878343000 | -2.535141000 |
| 1 | 1.828146000  | -3.947447000 | 6.958748000  | 6 | -6.626578000 | 22.264492000 | -3.881412000 |
| 1 | 2.381933000  | -2.798965000 | 4.828376000  | 6 | -5.884937000 | 21.716590000 | -4.975623000 |
| 1 | 2.513158000  | -0.790364000 | 3.607198000  | 6 | -4.883009000 | 20.804241000 | -4.730943000 |
| 1 | 2.522916000  | 1.485689000  | 4.844604000  | 6 | -4.138989000 | 17.965023000 | -3.038655000 |
| 1 | 0.848973000  | 1.731496000  | 4.314215000  | 1 | -5.105577000 | 20.658797000 | -1.273988000 |
| 1 | 2.139325000  | 1.581924000  | 3.118698000  | 1 | -6.916644000 | 22.308589000 | -1.723021000 |

<sup>4</sup>RC<sub>2</sub>:

|    |              |              |              |
|----|--------------|--------------|--------------|
| 26 | 1.082666000  | -3.298449000 | 1.407812000  |
| 7  | 0.435833000  | -4.765390000 | 2.673745000  |
| 7  | 2.933474000  | -4.529267000 | 1.479145000  |
| 7  | 1.674839000  | -1.960961000 | 0.036268000  |
| 6  | -0.789869000 | -4.827351000 | 3.209571000  |
| 6  | -1.115002000 | -5.746082000 | 4.227730000  |
| 6  | -0.135347000 | -6.597986000 | 4.708436000  |
| 6  | 1.178849000  | -6.546253000 | 4.169988000  |
| 6  | 2.239631000  | -7.379967000 | 4.617014000  |
| 6  | 3.494436000  | -7.271996000 | 4.050592000  |
| 6  | 3.740287000  | -6.334383000 | 3.014846000  |
| 6  | 2.730548000  | -5.506494000 | 2.557401000  |
| 6  | 1.437165000  | -5.599457000 | 3.128523000  |
| 1  | -1.518734000 | -4.127073000 | 2.825642000  |
| 1  | -2.121423000 | -5.765428000 | 4.625507000  |
| 1  | -0.357351000 | -7.305831000 | 5.500291000  |
| 1  | 2.049279000  | -8.097942000 | 5.407199000  |
| 1  | 4.303849000  | -7.904998000 | 4.393294000  |
| 1  | 4.734433000  | -6.273281000 | 2.586261000  |
| 6  | 2.137363000  | -0.734654000 | 0.325041000  |
| 6  | 2.438907000  | 0.197133000  | -0.689900000 |
| 6  | 2.268378000  | -0.162821000 | -2.019333000 |
| 6  | 1.781135000  | -1.457121000 | -2.353418000 |
| 6  | 1.567352000  | -1.910020000 | -3.685127000 |

<sup>4</sup>TS<sub>HA</sub>:

|    |              |              |              |
|----|--------------|--------------|--------------|
| 26 | -0.051309000 | -0.038438000 | -0.001092000 |
| 7  | 1.969656000  | 0.022509000  | 0.039402000  |
| 7  | 0.188828000  | 2.155062000  | 0.031026000  |
| 7  | -2.029831000 | -0.009727000 | -0.220904000 |
| 6  | 2.776605000  | -1.049231000 | 0.002661000  |
| 6  | 4.173463000  | -0.934409000 | 0.139799000  |
| 6  | 4.734722000  | 0.318426000  | 0.334700000  |
| 6  | 3.903481000  | 1.470237000  | 0.392430000  |
| 6  | 4.403654000  | 2.785926000  | 0.595995000  |
| 6  | 3.536105000  | 3.861324000  | 0.632279000  |
| 6  | 2.141222000  | 3.670567000  | 0.456732000  |
| 6  | 1.620599000  | 2.403171000  | 0.256480000  |
| 6  | 2.492447000  | 1.286847000  | 0.228865000  |
| 1  | 2.299171000  | -2.008622000 | -0.142589000 |
| 1  | 4.789233000  | -1.823126000 | 0.081561000  |
| 1  | 5.808799000  | 0.431721000  | 0.438137000  |
| 1  | 5.472073000  | 2.932971000  | 0.709492000  |

|   |              |              |              |
|---|--------------|--------------|--------------|
| 1 | 3.916888000  | 4.864882000  | 0.779180000  |
| 1 | 1.488639000  | 4.536544000  | 0.468816000  |
| 6 | -2.909400000 | -0.088881000 | 0.792906000  |
| 6 | -4.291271000 | -0.196766000 | 0.560767000  |
| 6 | -4.765722000 | -0.238933000 | -0.745144000 |
| 6 | -3.859994000 | -0.163962000 | -1.836634000 |
| 6 | -4.252268000 | -0.209239000 | -3.203503000 |
| 6 | -3.298952000 | -0.125991000 | -4.202962000 |
| 6 | -1.922499000 | 0.013905000  | -3.884438000 |
| 6 | -1.515502000 | 0.056369000  | -2.560278000 |
| 6 | -2.468572000 | -0.037425000 | -1.531618000 |
| 1 | -2.485334000 | -0.073474000 | 1.788656000  |
| 1 | -4.969056000 | -0.251029000 | 1.403111000  |
| 1 | -5.828662000 | -0.329378000 | -0.942081000 |
| 1 | -5.302902000 | -0.310517000 | -3.452219000 |
| 1 | -3.596082000 | -0.161634000 | -5.244331000 |
| 1 | -1.206520000 | 0.090197000  | -4.695123000 |
| 7 | -0.104311000 | 0.239868000  | -2.137257000 |
| 6 | 0.349396000  | 1.677094000  | -2.382511000 |
| 6 | -0.253661000 | 2.601145000  | -1.346730000 |
| 1 | 1.440692000  | 1.682817000  | -2.329838000 |
| 1 | 0.059196000  | 1.978134000  | -3.394504000 |
| 1 | 0.049595000  | 3.638466000  | -1.528624000 |
| 1 | -1.345580000 | 2.560332000  | -1.367800000 |
| 6 | 0.814599000  | -0.695296000 | -2.888672000 |
| 1 | 0.425498000  | -1.708003000 | -2.825778000 |
| 1 | 1.808407000  | -0.644775000 | -2.448910000 |
| 1 | 0.882694000  | -0.397926000 | -3.939016000 |
| 8 | -0.202930000 | -0.131962000 | 1.685000000  |
| 7 | -0.151600000 | -2.222376000 | -0.373579000 |
| 6 | -0.432062000 | -3.344408000 | -0.541435000 |
| 6 | -0.786880000 | -4.737766000 | -0.765766000 |
| 1 | -0.441974000 | -5.359903000 | 0.067229000  |
| 1 | -0.330054000 | -5.108421000 | -1.690612000 |
| 1 | -1.873869000 | -4.845741000 | -0.854762000 |
| 6 | -0.675039000 | 2.762911000  | 1.099808000  |
| 1 | -0.325045000 | 2.416141000  | 2.069979000  |
| 1 | -1.701418000 | 2.431349000  | 0.946009000  |
| 1 | -0.644279000 | 3.856123000  | 1.056053000  |
| 1 | 0.719223000  | -0.310540000 | 2.755635000  |
| 6 | 1.550026000  | -0.283251000 | 3.674024000  |
| 6 | 0.956548000  | -1.103307000 | 4.717192000  |
| 6 | 0.096770000  | -0.548814000 | 5.726856000  |
| 6 | -0.384470000 | -1.342708000 | 6.750992000  |
| 6 | -0.057483000 | -2.722693000 | 6.793069000  |
| 6 | 0.755091000  | -3.302124000 | 5.786537000  |
| 6 | 1.237432000  | -2.514940000 | 4.758116000  |
| 6 | 1.786392000  | 1.207480000  | 3.908715000  |
| 1 | -0.154581000 | 0.503945000  | 5.698332000  |
| 1 | -1.009832000 | -0.917145000 | 7.527246000  |
| 1 | -0.438741000 | -3.340702000 | 7.599228000  |
| 1 | 0.998708000  | -4.357010000 | 5.834829000  |
| 1 | 1.868597000  | -2.945799000 | 3.987699000  |
| 1 | 2.399666000  | -0.777597000 | 3.187411000  |
| 1 | 2.541209000  | 1.349260000  | 4.692165000  |
| 1 | 0.879792000  | 1.736188000  | 4.217582000  |
| 1 | 2.157066000  | 1.680843000  | 2.996993000  |
